# Supplementary material for: Genome-scale metabolic reconstruction and metabolic versatility of an obligate methanotroph Methylococcus capsulatus str. Bath
Source: PeerJ. 2019 Jun 14;7:e6685. doi: 10.7717/peerj.6685 (PMC6613435; doi:10.7717/peerj.6685)
Supplement: Supplemental Information 4 [file peerj-07-6685-s004.xlsx]

## Sheet: metabolites
Abbreviation	Description	Neutral formula	Charged formula	Charge	Compartment	KEGG ID	PubChem ID	ChEBI ID	InChI string	SMILES	HMDB ID
C00001[c]	water	H2O	H2O	0	cytosol	C00001		CHEBI:15377		[H]O[H]
C00001[p]	water	H2O	H2O	0	periplam	C00001		CHEBI:15377		[H]O[H]
C00002[c]	ATP	C10H16N5O13P3	C10H16N5O13P3	0	cytosol	C00002		CHEBI:15422		Nc1ncnc2n(cnc12)[C@@H]1O[C@H](COP(O)(=O)OP(O)(=O)OP(O)(O)=O)[C@@H](O)[C@H]1O
C00003[c]	Nicotinamide adenine dinucleotide	C21H28N7O14P2	C21H29N7O14P2	1	cytosol	C00003		CHEBI:15846		NC(=O)c1ccc[n+](c1)[C@@H]1O[C@H](COP(O)(=O)OP(O)(=O)OC[C@H]2O[C@H]([C@H](O)[C@@H]2O)n2cnc3c(N)ncnc23)[C@@H](O)[C@H]1O
C00004[c]	Reduced nicotinamide adenine dinucleotide	C21H29N7O14P2	C21H29N7O14P2	0	cytosol	C00004		CHEBI:16908		NC(=O)C1=CN(C=CC1)[C@@H]1O[C@H](COP(O)(=O)OP(O)(=O)OC[C@H]2O[C@H]([C@H](O)[C@@H]2O)n2cnc3c(N)ncnc23)[C@@H](O)[C@H]1O
C00005[c]	Reduced nicotinamide adenine dinucleotide phosphate	C21H30N7O17P3	C21H30N7O17P3	0	cytosol	C00005		CHEBI:16474		NC(=O)C1=CN(C=CC1)[C@@H]1O[C@H](COP(O)(=O)OP(O)(=O)OC[C@H]2O[C@H]([C@H](OP(O)(O)=O)[C@@H]2O)n2cnc3c(N)ncnc23)[C@@H](O)[C@H]1O
C00006[c]	Nicotinamide adenine dinucleotide phosphate	C21H29N7O17P3	C21H30N7O17P3	1	cytosol	C00006		CHEBI:18009		NC(=O)c1ccc[n+](c1)[C@@H]1O[C@H](COP(O)(=O)OP(O)(=O)OC[C@H]2O[C@H]([C@H](OP(O)(O)=O)[C@@H]2O)n2cnc3c(N)ncnc23)[C@@H](O)[C@H]1O
C00007[c]	Oxygen	O2	O2	0	cytosol	C00007		CHEBI:15379		O=O
C00008[c]	Adenosine 5'-diphosphate	C10H15N5O10P2	C10H15N5O10P2	0	cytosol	C00008		CHEBI:16761		Nc1ncnc2n(cnc12)[C@@H]1O[C@H](COP(O)(=O)OP(O)(O)=O)[C@@H](O)[C@H]1O
C00009[c]	Phosphoric acid	H3PO4	O4P	-3	cytosol	C00009
C00009[p]	Phosphoric acid	H3PO4	O4P	-3	periplam	C00009
C00010[c]	Coenzyme A	C21H36N7O16P3S	C21H36N7O16P3S	0	cytosol	C00010		CHEBI:15346		CC(C)(COP(O)(=O)OP(O)(=O)OC[C@H]1O[C@H]([C@H](O)[C@@H]1OP(O)(O)=O)n1cnc2c(N)ncnc12)[C@@H](O)C(=O)NCCC(=O)NCCS
C00011[c]	Carbon dioxide	CO2	CO2	0	cytosol	C00011		CHEBI:16526		O=C=O
C00011[p]	Carbon dioxide	CO2	CO2	0	periplam	C00011		CHEBI:16526		O=C=O
C00012[c]	Peptide	C2H4NO2R(C2H2NOR)n	C2H4NO2R(C2H2NOR)n	0	cytosol	C00012		CHEBI:16670
C00013[c]	Diphosphoric acid	H4P2O7	O7P2	-4	cytosol	C00013
C00014[c]	Ammonia	NH3	NH3	0	cytosol	C00014		CHEBI:16134		[H]N([H])[H]
C00014[p]	Ammonia	NH3	NH3	0	periplam	C00014		CHEBI:16134		[H]N([H])[H]
C00015[c]	Uridine 5'-diphosphate	C9H14N2O12P2	C9H14N2O12P2	0	cytosol	C00015		CHEBI:17659		O[C@@H]1[C@@H](COP(O)(=O)OP(O)(O)=O)O[C@H]([C@@H]1O)n1ccc(=O)[nH]c1=O
C00016[c]	Flavin adenine dinucleotide	C27H33N9O15P2	C27H33N9O15P2	0	cytosol	C00016		CHEBI:16238		Cc1cc2nc3c(nc(=O)[nH]c3=O)n(C[C@H](O)[C@H](O)[C@H](O)COP(O)(=O)OP(O)(=O)OC[C@H]3O[C@H]([C@H](O)[C@@H]3O)n3cnc4c(N)ncnc34)c2cc1C
C00019[c]	S-Adenosyl-L-methionine	C15H22N6O5S	C15H23N6O5S	1	cytosol	C00019
C00020[c]	Adenosine 5'-monophosphate	C10H14N5O7P	C10H14N5O7P	0	cytosol	C00020
C00021[c]	S-Adenosylhomocysteine	C14H20N6O5S	C14H20N6O5S	0	cytosol	C00021
C00022[c]	pyruvic acid	C3H4O3	C3H3O3	-1	cytosol	C00022
C00022[p]	pyruvic acid	C3H4O3	C3H3O3	-1	periplam	C00022
C00023[c]	Iron	Fe	Fe	0	cytosol	C00023
C00023[p]	Iron	Fe	Fe	0	periplam	C00023
C00024[c]	Acetyl coenzyme A	C23H38N7O17P3S	C23H38N7O17P3S	0	cytosol	C00024
C00025[c]	L-Glutamic acid	C5H9NO4	C5H8NO4	-1	cytosol	C00025
C00025[e]	L-Glutamic acid	C5H9NO4	C5H8NO4	-1	extracellular	C00025
C00026[c]	Oxoglutaric acid;	C5H6O5	C5H4O5	-2	cytosol	C00026
C00027[c]	Hydrogen peroxide	H2O2	H2O2	0	cytosol	C00027
C00028[c]	Hydrogen-Acceptor				cytosol	C00028
C00029[c]	Uridine diphosphate glucose;	C15H24N2O17P2	C15H24N2O17P2	0	cytosol	C00029
C00030[c]	Reducedacceptor				cytosol	C00030
C00031[c]	D-Glucose	C6H12O6	C6H12O6	0	cytosol	C00031
C00032[c]	Heme	C34H32FeN4O4	C34H30FeN4O4	-2	cytosol	C00032
C00032[p]	Heme	C34H32FeN4O4	C34H30FeN4O4	-2	periplam	C00032
C00033[c]	Acetic acid	C2H4O2	C2H3O2	-1	cytosol	C00033
C00033[p]	Acetic acid	C2H4O2	C2H3O2	-1	periplam	C00033
C00035[c]	Guanosine diphosphate	C10H15N5O11P2	C10H12N5O11P2	-3	cytosol	C00035
C00036[c]	Oxalacetic acid	C4H4O5	C4H2O5	-2	cytosol	C00036
C00036[e]	Oxalacetic acid	C4H4O5	C4H2O5	-2	extracellular	C00036
C00037[c]	Glycine	C2H5NO2	C2H5NO2	0	cytosol	C00037
C00040[c]	Acyl coenzyme A	C22H35N7O17P3SR	C22H35N7O17P3SR	0	cytosol	C00040
C00041[c]	L-Alanine	C3H7NO2	C3H7NO2	0	cytosol	C00041
C00041[e]	L-Alanine	C3H7NO2	C3H7NO2	0	extracellular	C00041
C00042[c]	Succinic acid	C4H6O4	C4H4O4	-2	cytosol	C00042
C00042[p]	Succinic acid	C4H6O4	C4H4O4	-2	periplam	C00042
C00043[c]	UDP-N-acetylglucosamine	C17H27N3O17P2	C17H27N3O17P2	0	cytosol	C00043
C00044[c]	Guanosine 5'-triphosphate	C10H16N5O14P3	C10H16N5O14P3	0	cytosol	C00044
C00047[c]	L-Lysine	C6H14N2O2	C6H15N2O2	1	cytosol	C00047
C00048[c]	Glyoxylic acid	C2H2O3	C2H1O3	-1	cytosol	C00048
C00049[c]	L-Aspartic acid	C4H7NO4	C4H6NO4	-1	cytosol	C00049
C00049[e]	L-Aspartic acid	C4H7NO4	C4H6NO4	-1	extracellular	C00049
C00051[c]	Glutathione	C10H17N3O6S	C10H17N3O6S	0	cytosol	C00051
C00052[c]	UDP-galactose	C15H24N2O17P2	C15H24N2O17P2	0	cytosol	C00052
C00053[c]	3'-Phosphoadenylyl sulfate	C10H15N5O13P2S	C10H15N5O13P2S	0	cytosol	C00053
C00054[c]	Adenosine 3',5'-bisphosphate	C10H15N5O10P2	C10H11N5O10P2	-4	cytosol	C00054
C00055[c]	Cytidylic acid	C9H14N3O8P	C9H12N3O8P	-2	cytosol	C00055
C00058[c]	Formic acid	CH2O2	CHO2	-1	cytosol	C00058
C00058[p]	Formic acid	CH2O2	CHO2	-1	periplam	C00058
C00059[c]	Sulfuric acid	H2O4S	O4S	-2	cytosol	C00059
C00059[p]	Sulfuric acid	H2O4S	O4S	-2	periplam	C00059
C00060[c]	Carboxylic acid	CHO2R	CO2R	-1	cytosol	C00060
C00061[c]	Flavin mononucleotide	C17H21N4O9P	C17H21N4O9P	0	cytosol	C00061
C00062[c]	L-Arginine	C6H14N4O2	C6H15N4O2	1	cytosol	C00062
C00063[c]	Cytidine triphosphate	C9H16N3O14P3	C9H13N3O14P3	-3	cytosol	C00063
C00064[c]	L-Glutamine	C5H10N2O3	C5H9N2O3	-1	cytosol	C00064
C00064[e]	L-Glutamine	C5H10N2O3	C5H9N2O3	-1	extracellular	C00064
C00065[c]	Serine	C3H7NO3	C3H7NO3	0	cytosol	C00065
C00067[c]	Formaldehyde	CH2O	CH2O	0	cytosol	C00067
C00067[e]	Formaldehyde	CH2O	CH2O	0	extracellular	C00067
C00067[p]	Formaldehyde	CH2O	CH2O	0	cytosol	C00067
C00068[c]	Thiamin diphosphate	C12H20N4O7P2S	C12H21N4O7P2S	1	cytosol	C00068
C00070[c]	Copper	Cu	Cu+2	2	cytosol	C00070
C00070[p]	Copper	Cu	Cu+2	2	periplam	C00070
C00073[c]	Methionine	C5H11NO2S	C5H11NO2S	0	cytosol	C00073
C00074[c]	Phosphoenolpyruvate	C3H5O6P	C3H4O6P	-1	cytosol	C00074
C00075[c]	Uridine triphosphate	C9H15N2O15P3	C9H15N2O15P3	0	cytosol	C00075
C00076[c]	Calciumcation	Ca+2	Ca+2	2	cytosol	C00076
C00076[p]	Calciumcation	Ca+2	Ca+2	2	periplam	C00076
C00077[c]	L-Ornithine	C5H12N2O2	C5H13N2O2	1	cytosol	C00077
C00078[c]	Tryptophan	C11H12N2O2	C11H12N2O2	0	cytosol	C00078
C00079[c]	L-Phenylalanine	C9H11NO2	C9H11NO2	0	cytosol	C00079
C00080[c]	Hydron	H	H+	1	cytosol	C00080
C00081[c]	Inosine tripolyphosphate	C10H15N4O14P3	C10H11N4O14P3	-4	cytosol	C00081
C00082[c]	Tyrosine	C9H11NO3	C9H11NO3	0	cytosol	C00082
C00083[c]	Malonyl coenzyme A	C24H38N7O19P3S	C24H38N7O19P3S	0	cytosol	C00083
C00084[c]	Acetaldehyde	C2H4O	C2H4O	0	cytosol	C00084
C00085[c]	D-Fructose 6-phosphate	C6H13O9P	C6H11O9P	-2	cytosol	C00085
C00086[c]	Urea	CH4N2O	CH4N2O	0	cytosol	C00086
C00088[c]	Nitrite	HNO2	NO2	-1	cytosol	C00088
C00088[p]	Nitrite	HNO2	NO2	-1	periplam	C00088
C00089[c]	Sucrose	C12H22O11	C12H22O11	0	cytosol	C00089
C00091[c]	Succinyl-CoA	C25H40N7O19P3S	C25H35N7O19P3S	-5	cytosol	C00091
C00092[c]	Glucose 6-phosphate	C6H13O9P	C6H11O9P	-2	cytosol	C00092
C00093[c]	D-Glycerol 1-phosphate	C3H9O6P	C3H7O6P	-2	cytosol	C00093
C00094[c]	Sulfurous acid	H2O3S	H2O3S	-2	cytosol	C00094
C00095[c]	D-Fructose	C6H12O6	C6H12O6	0	cytosol	C00095
C00096[c]	GDP-alpha-D-mannose	C16H25N5O16P2	C16H23N5O16P2	-2	cytosol	C00096
C00097[c]	L-Cysteine	C3H7NO2S	C3H7NO2S	0	cytosol	C00097
C00097[e]	L-Cysteine	C3H7NO2S	C3H7NO2S	0	extracellular	C00097
C00099[c]	Beta-Alanine	C3H7NO2	C3H7NO2	0	cytosol	C00099
C00100[c]	Propionyl coenzyme A	C24H40N7O17P3S	C24H40N7O17P3S	0	cytosol	C00100
C00101[c]	Tetrahydrofolate	C19H23N7O6	C19H21N7O6	-2	cytosol	C00101
C00103[c]	D-Glucose 1-phosphate	C6H13O9P	C6H11O9P	-2	cytosol	C00103
C00104[c]	Inosine diphosphate	C10H14N4O11P2	C10H11N4O11P2	-3	cytosol	C00104
C00105[c]	5'Uridylic acid	C9H13N2O9P	C9H11N2O9P	-2	cytosol	C00105
C00106[c]	Uracil	C4H4N2O2	C4H4N2O2	0	cytosol	C00106
C00108[c]	2-Aminobenzoate	C7H7NO2	C7H7NO2	0	cytosol	C00108
C00109[c]	Alpha-Ketobutyrate	C4H6O3	C4H5O3	-1	cytosol	C00109
C00111[c]	3-Hydroxy-2-oxopropyl phosphate	C3H7O6P	C3H5O6P	-2	cytosol	C00111
C00112[c]	Cytidine diphosphate	C9H15N3O11P2	C9H13N3O11P2	-2	cytosol	C00112
C00114[c]	Bilineurine	C5H14NO	C5H15NO	1	cytosol	C00114
C00116[c]	Glycerol	C3H8O3	C3H8O3	0	cytosol	C00116
C00117[c]	Ribose 5-phosphate	C5H11O8P	C5H9O8P	-2	cytosol	C00117
C00118[c]	Glyceraldehyde 3-phosphate	C3H7O6P	C3H5O6P	-2	cytosol	C00118
C00119[c]	5-Phosphoribosyl 1-pyrophosphate	C5H13O14P3	C5H8O14P3	-5	cytosol	C00119
C00120[c]	Biotin	C10H16N2O3S	C10H15N2O3S	-1	cytosol	C00120
C00122[c]	trans-Butenedioic acid	C4H4O4	C4H2O4	-2	cytosol	C00122
C00123[c]	(2S)-alpha-Leucine	C6H13NO2	C6H13NO2	0	cytosol	C00123
C00125[c]	Cytochrome c3+	C42H44FeN8O8S2R4	C42H44FeN8O8S2R4	1	cytosol	C00125
C00126[c]	Reduced cytochrome c	C42H44FeN8O8S2R4	C42H44FeN8O8S2R4	0	cytosol	C00126
C00127[c]	Oxidized glutathione	C20H32N6O12S2	C20H30N6O12S2	-2	cytosol	C00127
C00129[c]	delta3-Methyl-3-butenyl diphosphate	C5H12O7P2	C5H10O7P2	-2	cytosol	C00129
C00130[c]	5'-IMP	C10H13N4O8P	C10H11N4O8P	-2	cytosol	C00130
C00131[c]	dATP	C10H16N5O12P3	C10H13N5O12P3	-3	cytosol	C00131
C00132[c]	Methanol	CH4O	CH4O	0	cytosol	C00132
C00132[e]	Methanol	CH4O	CH4O	0	extracellular	C00132
C00133[c]	D-Alanine	C3H7NO2	C3H7NO2	0	cytosol	C00133
C00134[c]	Butane-1,4-diamine	C4H12N2	C4H14N2	2	cytosol	C00134
C00135[c]	L-Histidine	C6H9N3O2	C6H9N3O2	0	cytosol	C00135
C00137[c]	Inositol	C6H12O6	C6H12O6	0	cytosol	C00137
C00138[c]	Reducedferredoxin	XH2	XH2		extracellular	C00138
C00139[c]	Oxidizedferredoxin	X	X		extracellular	C00139
C00140[c]	2-Acetamido-2-deoxy-D-glucose;	C8H15NO6	C8H15NO6	0	cytosol	C00140
C00141[c]	2-Keto-3-methylbutyric acid	C5H8O3	C5H7O3	-1	cytosol	C00141
C00141[e]	2-Keto-3-methylbutyric acid	C5H8O3	C5H7O3	-1	extracellular	C00141
C00143[c]	5,10-Methylenetetrahydrofolate	C20H23N7O6	C20H22N7O6	-1	cytosol	C00143
C00144[c]	Guanylic acid	C10H14N5O8P	C10H13N5O8P	-1	cytosol	C00144
C00147[c]	6-Aminopurine	C5H5N5	C5H6N5	1	cytosol	C00147
C00148[c]	2-Pyrrolidinecarboxylic acid	C5H9NO2	C5H9NO2	0	cytosol	C00148
C00149[c]	Malic acid	C4H6O5	C4H4O5	-2	cytosol	C00149
C00151[c]	L-2-Amino acid	C2H4NO2R	C2H4NO2R	0	cytosol	C00151
C00152[c]	2-Aminosuccinamic acid	C4H8N2O3	C4H8N2O3	0	cytosol	C00152
C00152[e]	2-Aminosuccinamic acid	C4H8N2O3	C4H8N2O3	0	extracellular	C00152
C00153[c]	Nicotinamide	C6H6N2O	C6H6N2O	0	cytosol	C00153
C00154[c]	Palmitoyl-CoA	C37H66N7O17P3S	C37H66N7O17P3S	0	extracellular	C00154
C00155[c]	Homocysteine	C4H9NO2S	C4H9NO2S	0	cytosol	C00155
C00156[c]	Hydroxybenzenecarboxylic acid	C7H6O3	C7H5O3	-1	cytosol	C00156
C00157[c]	Phosphatidylcholine (is normally +1 charged but at ph 7 loses H+)	C10H17NO8PR2	C10H18NO8PR2	1	cytosol	C00157
C00158[c]	2-Hydroxytricarballylic acid	C6H8O7	C6H5O7	-3	cytosol	C00158
C00160[c]	Hydroxyacetic acid	C2H4O3	C2H3O3	-1	cytosol	C00160
C00161[c]	2-Oxo carboxylate	C2HO3R	C2O3R	-1	cytosol	C00161
C00163[c]	Propionic acid	C3H6O2	C3H5O2	-1	cytosol	C00163
C00166[c]	2-Oxo-3-phenylpropanoate	C9H8O3	C9H7O3	-1	cytosol	C00166
C00167[c]	UDP-alpha-D-glucuronate	C15H22N2O18P2	C15H19N2O18P2	-3	cytosol	C00167
C00168[c]	3-Hydroxypyruvic acid	C3H4O4	C3H3O4	-1	cytosol	C00168
C00169[c]	Carbamoyl phosphate	CH4NO5P	CH2NO5P	-2	cytosol	C00169
C00170[c]	Thiomethyladenosine	C11H15N5O3S	C11H15N5O3S	0	cytosol	C00170
C00173[c]	Acyl-[acyl-carrier protein]	C3H4OSR2	C3H4OSR2	0	cytosol	C00173
C00175[c]	Cobalt ion	Co	Co+2	2	cytosol	C00175
C00175[p]	Cobalt ion	Co	Co+2	2	periplam	C00175
C00177[c]	Cyanide	CN	CN-	-1	cytosol	C00177
C00178[c]	Thymine	C5H6N2O2	C5H6N2O2	0	cytosol	C00178
C00179[c]	Agmatine	C5H14N4	C5H16N4	2	cytosol	C00179
C00180[c]	Benzoate	C7H6O2	C7H5O2	-1	cytosol	C00180
C00182[c]	Glycogen	C6H12O6	C6H12O6	0	cytosol	C00182
C00183[c]	L-Valine	C5H11NO2	C5H11NO2	0	cytosol	C00183
C00183[e]	L-Valine	C5H11NO2	C5H11NO2	0	extracellular	C00183
C00184[c]	Glycerone	C3H6O3	C3H6O3	0	cytosol	C00184
C00185[c]	1-beta-D-Glucopyranosyl-4-D-glucopyranose	C12H22O11	C12H22O11	0	cytosol	C00185
C00187[c]	Cholesterol	C27H46O	C27H46O	0	cytosol	C00187
C00188[c]	L-Threonine	C4H9NO3	C4H9NO3	0	cytosol	C00188
C00189[c]	2-Hydroxyethylamine	C2H7NO	C2H8NO	1	cytosol	C00189
C00190[c]	UDP-alpha-D-xylose	C14H22N2O16P2	C14H20N2O16P2	-2	cytosol	C00190
C00192[c]	Hydroxylamine	NH3O	NH3O	0	cytosol	C00192
C00194[c]	Funacomide	C72H100CoN18O17P	C72H100CoN18O17P	0	cytosol	C00194
C00197[c]	3-Phosphoglycerate	C3H7O7P	C3H4O7P	-3	cytosol	C00197
C00199[c]	D-Ribulose 5-phosphate	C5H11O8P	C5H9O8P	-2	cytosol	C00199
C00203[c]	UDP-N-acetyl-alpha-D-galactosamine	C17H27N3O17P2	C17H25N3O17P2	-2	cytosol	C00203
C00206[c]	2'-Deoxyadenosine 5'-diphosphate	C10H15N5O9P2	C10H12N5O9P2	-3	cytosol	C00206
C00208[c]	Maltose	C12H22O11	C12H22O11	0	cytosol	C00208
C00212[c]	Adenosine	C10H13N5O4	C10H13N5O4	0	cytosol	C00212
C00214[c]	Thymidine	C10H14N2O5	C10H14N2O5	0	cytosol	C00214
C00217[c]	D-Glutamic acid	C5H9NO4	C5H8NO4	-1	cytosol	C00217
C00221[c]	Beta-D-Glucose	C6H12O6	C6H12O6	0	cytosol	C00221
C00224[c]	5'-Adenylyl sulfate	C10H14N5O10PS	C10H12N5O10PS	-2	cytosol	C00224
C00227[c]	Acetyl phosphate	C2H5O5P	C2H3O5P	-2	cytosol	C00227
C00229[c]	Acyl-carrier protein	C2H3SR	C2H3SR	0	cytosol	C00229
C00231[c]	D-Xylulose 5-phosphate	C5H11O8P	C5H9O8P	-2	cytosol	C00231
C00232[c]	4-Oxobutanoate	C4H6O3	C4H5O3	-1	cytosol	C00232
C00233[c]	2-Oxoisocaproate	C6H10O3	C6H9O3	-1	cytosol	C00233
C00234[c]	10-Formyltetrahydrofolate	C20H23N7O7	C20H21N7O7	-2	cytosol	C00234
C00235[c]	Prenyl diphosphate	C5H12O7P2	C5H9O7P2	-3	cytosol	C00235
C00236[c]	D-Glycerate 1,3-diphosphate	C3H8O10P2	C3H4O10P2	-4	cytosol	C00236
C00237[c]	Carbon monoxide	CO	CO	0	cytosol	C00237
C00239[c]	2'-Deoxycytidine 5'-monophosphate	C9H14N3O7P	C9H14N3O7P	-2	cytosol	C00239
C00242[c]	Guanine	C5H5N5O	C5H5N5O	0	cytosol	C00242
C00244[c]	Nitric acid	HNO3	NO3	-1	cytosol	C00244
C00244[p]	Nitric acid	HNO3	NO3	-1	periplam	C00244
C00245[c]	Aminoethylsulfonic acid	C2H7NO3S	C2H7NO3S	0	cytosol	C00245
C00248[c]	Thioctic acid amide	C8H15NOS2	C8H15NOS2	0	cytosol	C00248
C00249[c]	Hexadecanoicacid	C16H32O2	C16H31O2	-1	cytosol	C00249
C00251[c]	Chorismate	C10H10O6	C10H8O6	-2	cytosol	C00251
C00253[c]	Nicotinic acid	C6H5NO2	C6H4NO2	-1	cytosol	C00253
C00254[c]	Prephenic acid	C10H10O6	C10H8O6	-2	cytosol	C00254
C00255[c]	Riboflavin	C17H20N4O6	C17H19N4O6	-1	cytosol	C00255
C00256[c]	D-Lactic acid	C3H6O3	C3H5O3	-1	cytosol	C00256
C00256[p]	D-Lactic acid	C3H6O3	C3H5O3	-1	periplam	C00256
C00258[c]	Glyceric acid	C3H6O4	C3H5O4	-1	cytosol	C00258
C00262[c]	Hypoxanthine	C5H4N4O	C5H4N4O	0	cytosol	C00262
C00263[c]	L-Homoserine;	C4H9NO3	C4H9NO3	0	cytosol	C00263
C00266[c]	Hydroxyacetaldehyde	C2H4O2	C2H4O2	0	cytosol	C00266
C00267[c]	Alpha-D-Glucose	C6H12O6	C6H12O6	0	cytosol	C00267
C00269[c]	CDP-diacylglycerol	C14H19N3O15P2R2	C14H17N3O15P2R2	-2	cytosol	C00269
C00275[c]	D-Mannose 6-phosphate	C6H13O9P	C6H11O9P	-2	cytosol	C00275
C00279[c]	D-Erythrose 4-phosphate	C4H9O7P	C4H7O7P	-2	cytosol	C00279
C00282[c]	Hydrogen	H2	H2	0	cytosol	C00282
C00283[c]	Hydrogen sulfide	H2S	H2S	0	cytosol	C00283
C00286[c]	Deoxyguanosine triphosphate	C10H16N5O13P3	C10H12N5O13P3	-4	cytosol	C00286
C00288[c]	Bicarbonate	HCO3	HCO3	-1	cytosol	C00288
C00294[c]	Inosine	C10H12N4O5	C10H12N4O5	0	cytosol	C00294
C00295[c]	Uracil-6-carboxylic acid	C5H4N2O4	C5H3N2O4	-1	cytosol	C00295
C00299[c]	Uridine	C9H12N2O6	C9H12N2O6	0	cytosol	C00299
C00301[c]	Adenosine diphosphate ribose	C15H23N5O14P2	C15H21N5O14P2	-2	cytosol	C00301
C00302[c]	Glutaminic acid	C5H9NO4	C5H8NO4	-1	cytosol	C00302
C00305[c]	Magnesiumcation	Mg	Mg+2	2	cytosol	C00305
C00305[p]	Magnesiumcation	Mg	Mg+2	2	periplam	C00305
C00311[c]	Isocitric acid	C6H8O7	C6H5O7	-3	cytosol	C00311
C00315[c]	Spermidine	C7H19N3	C7H22N3	3	cytosol	C00315
C00320[c]	Thiosulfate	H2S2O3	S2O3	-2	cytosol	C00320
C00322[c]	2-Oxoadipic acid	C6H8O5	C6H6O5	-2	cytosol	C00322
C00325[c]	GDP-beta-L-fucose	C16H25N5O15P2	C16H23N5O15P2	-2	cytosol	C00325
C00327[c]	Citrulline	C6H13N3O3	C6H13N3O3	0	cytosol	C00327
C00330[c]	Deoxyguanosine	C10H13N5O4	C10H13N5O4	0	cytosol	C00330
C00331[c]	Indolepyruvate	C11H9NO3	C11H8NO3	-1	cytosol	C00331
C00337[c]	Dihydro-L-orotic acid	C5H6N2O4	C5H5N2O4	-1	cytosol	C00337
C00341[c]	Geranyl diphosphate	C10H20O7P2	C10H17O7P2	-3	cytosol	C00341
C00342[c]	Reduced thioredoxin	C10H14N4O4S2R4	C10H14N4O4S2R4	0	cytosol	C00342
C00343[c]	Thioredoxin sulfide	C10H12N4O4S2R4	C10H12N4O4S2R4	0	cytosol	C00343
C00344[c]	Phosphatidylglycerol	C8H13O10PR2	C8H12O10PR2	-1	cytosol	C00344
C00345[c]	6-Phospho-D-gluconate	C6H13O10P	C6H10O10P	-3	cytosol	C00345
C00350[c]	L-1-Phosphatidylethanolamine	C7H12NO8PR2	C7H12NO8PR2	0	cytosol	C00350
C00352[c]	D-Glucosamine phosphate	C6H14NO8P	C6H13NO8P	-1	cytosol	C00352
C00354[c]	D-Fructose 1,6-bisphosphate	C6H14O12P2	C6H10O12P2	-4	cytosol	C00354
C00360[c]	Deoxyadenosine monophosphate	C10H14N5O6P	C10H12N5O6P	-2	cytosol	C00360
C00361[c]	2'-Deoxyguanosine 5'-diphosphate	C10H15N5O10P2	C10H12N5O10P2	-3	cytosol	C00361
C00362[c]	Deoxyguanosine monophosphate	C10H14N5O7P	C10H12N5O7P	-2	cytosol	C00362
C00363[c]	Deoxythymidine 5'-diphosphate	C10H16N2O11P2	C10H13N2O11P2	-3	cytosol	C00363
C00364[c]	Thymidylate	C10H15N2O8P	C10H13N2O8P	-2	cytosol	C00364
C00365[c]	Deoxyuridylic acid	C9H13N2O8P	C9H11N2O8P	-2	cytosol	C00365
C00369[c]	Starch	C6H12O6	C6H12O6	0	cytosol	C00369
C00380[c]	Cytosine	C4H5N3O	C4H5N3O	0	cytosol	C00380
C00385[c]	Xanthine	C5H4N4O2	C5H4N4O2	0	cytosol	C00385
C00387[c]	Guanosine	C10H13N5O5	C10H13N5O5	0	cytosol	C00387
C00388[c]	Histamine	C5H9N3	C5H10N3	1	cytosol	C00388
C00390[c]	Ubiquinol	C14H20O4(C5H8)8	C14H20O4(C5H8)8	0	cytosol	C00390
C00399[c]	Ubiquinone	C14H18O4(C5H8)8	C14H18O4(C5H8)8	0	cytosol	C00399
C00402[c]	D-Aspartic acid	C4H7NO4	C4H6NO4	-1	cytosol	C00402
C00405[c]	D-Amino acid	C2H4NO2R	C2H4NO2R	0	cytosol	C00405
C00407[c]	L-Isoleucine	C6H13NO2	C6H13NO2	0	cytosol	C00407
C00415[c]	Dihydrofolic acid	C19H21N7O6	C19H19N7O6	-2	cytosol	C00415
C00416[c]	Phosphatidic acid	C5H7O8PR2	C5H5O8PR2	-2	cytosol	C00416
C00417[c]	cis-Aconitic acid	C6H6O6	C6H3O6	-3	cytosol	C00417
C00423[c]	Trans-Cinnamate	C9H8O2	C9H7O2	-1	cytosol	C00423
C00430[c]	5-Amino-4-oxovaleric acid	C5H9NO3	C5H9NO3	0	cytosol	C00430
C00436[c]	N-Carbamoylputrescine	C5H13N3O	C5H14N3O	1	cytosol	C00436
C00437[c]	N2-Acetyl-L-ornithine	C7H14N2O3	C7H14N2O3	0	cytosol	C00437
C00438[c]	N-Carbamoyl-L-aspartate	C5H8N2O5	C5H6N2O5	-2	cytosol	C00438
C00440[c]	5-Methyltetrahydrofolate	C20H25N7O6	C20H23N7O6	-2	cytosol	C00440
C00441[c]	L-Aspartic 4-semialdehyde	C4H7NO3	C4H6NO3	-1	cytosol	C00441
C00445[c]	5,10-Methenyltetrahydrofolate	C20H22N7O6	C20H21N7O6	-1	cytosol	C00445
C00448[c]	(2E,6E)-Farnesyl diphosphate	C15H28O7P2	C15H25O7P2	-3	cytosol	C00448
C00455[c]	beta-Nicotinamide mononucleotide	C11H15N2O8P	C11H14N2O8P	-1	cytosol	C00455
C00458[c]	2'-Deoxycytidine 5'-triphosphate	C9H16N3O13P3	C9H12N3O13P3	-4	cytosol	C00458
C00459[c]	Deoxythymidine 5'-triphosphate	C10H17N2O14P3	C10H17N2O14P3	-4	cytosol	C00459
C00460[c]	2'-Deoxyuridine 5'-triphosphate	C9H15N2O14P3	C9H11N2O14P3	-4	cytosol	C00460
C00462[c]	Hydrogen halide	HX	X	-1	cytosol	C00462
C00463[c]	Indole	C8H7N	C8H7N	0	cytosol	C00463
C00469[c]	Ethanol	C2H6O	C2H6O	0	cytosol	C00469
C00469[p]	Ethanol	C2H6O	C2H6O	0	periplam	C00469
C00475[c]	Cytidine	C9H13N3O5	C9H13N3O5	0	cytosol	C00475
C00489[c]	Glutarate	C5H8O4	C5H6O4	-2	cytosol	C00489
C00490[c]	Itaconate	C5H6O4	C5H4O4	-2	cytosol	C00490
C00491[c]	L-Cystine	C6H12N2O4S2	C6H10N2O4S2	-2	cytosol	C00491
C00493[c]	Shikimic acid	C7H10O5	C7H9O5	-1	cytosol	C00493
C00498[c]	Adenosine diphosphoglucose	C16H25N5O15P2	C16H23N5O15P2	-2	cytosol	C00498
C00504[c]	Folic acid	C19H19N7O6	C19H17N7O6	-2	cytosol	C00504
C00506[c]	3-Sulfoalanine	C3H7NO5S	C3H6NO5S	-1	cytosol	C00506
C00515[c]	D-Ornithine	C5H12N2O2	C5H13N2O2	1	cytosol	C00515
C00522[c]	Pantoic acid	C6H12O4	C6H11O4	-1	cytosol	C00522
C00526[c]	2'-Deoxyuridine	C9H12N2O5	C9H12N2O5	0	cytosol	C00526
C00527[c]	Glutaryl-CoA	C26H42N7O19P3S	C26H37N7O19P3S	-5	cytosol	C00527
C00531[c]	Itaconyl-CoA	C26H40N7O19P3S	C26H39N7O19P3S	-1	cytosol	C00531
C00533[c]	Nitrogen monoxide	NO	NO	0	cytosol	C00533
C00536[c]	Inorganic triphosphate	H5P3O10	P3O10	-5	cytosol	C00536
C00546[c]	2-Oxopropanal	C3H4O2	C3H4O2	0	cytosol	C00546
C00556[c]	Benzylalcohol	C7H8O	C7H8O	0	cytosol	C00556
C00559[c]	2'-Deoxyadenosine	C10H13N5O3	C10H13N5O3	0	cytosol	C00559
C00561[c]	Mandelonitrile	C8H7NO	C8H7NO	0	cytosol	C00561
C00568[c]	P-Aminobenzoate	C7H7NO2	C7H6NO2	-1	cytosol	C00568
C00577[c]	D-Glyceraldehyde	C3H6O3	C3H6O3	0	cytosol	C00577
C00579[c]	Dihydrothioctamide	C8H17NOS2	C8H17NOS2	0	cytosol	C00579
C00582[c]	Phenylacetyl-CoA	C29H42N7O17P3S	C29H38N7O17P3S	-4	cytosol	C00582
C00606[c]	3-Sulfino-L-alanine	C3H7NO4S	C3H7NO4S	0	cytosol	C00606
C00617[c]	UDPgalacturonate	C15H22N2O18P2	C15H19N2O18P2	-3	cytosol	C00617
C00620[c]	D-Ribose 1-phosphate	C5H11O8P	C5H9O8P	-2	cytosol	C00620
C00624[c]	N-Acetyl-L-glutamic acid	C7H11NO5	C7H9NO5	-2	cytosol	C00624
C00627[c]	Pyridoxol 5'-phosphate	C8H12NO6P	C8H10NO6P	-2	cytosol	C00627
C00631[c]	2-Phospho-(R)-glycerate	C3H7O7P	C3H4O7P	-3	cytosol	C00631
C00636[c]	alpha-D-Mannose 1-phosphate	C6H13O9P	C6H11O9P	-2	cytosol	C00636
C00637[c]	Indoleacetaldehyde	C10H9NO	C10H9NO	0	cytosol	C00637
C00641[c]	L-1,2-Diacylglycerol	C5H6O5R2	C5H3O5R2	-3	cytosol	C00641
C00655[c]	(9-D-Ribosylxanthine)-5'-phosphate	C10H13N4O9P	C10H11N4O9P	-2	cytosol	C00655
C00666[c]	LL-2,6-Diaminopimelic acid	C7H14N2O4	C7H14N2O4	0	cytosol	C00666
C00668[c]	alpha-D-Glucose 6-phosphate	C6H13O9P	C6H11O9P	-2	cytosol	C00668
C00669[c]	Gamma-Glutamylcysteine	C8H14N2O5S	C8H13N2O5S	-1	cytosol	C00669
C00670[c]	Glycerophosphocholine	C8H21NO6P	C8H21NO6P	0	cytosol	C00670
C00671[c]	(3S)-3-Methyl-2-oxopentanoate	C6H10O3	C6H9O3	-1	cytosol	C00671
C00672[c]	2-Deoxy-alpha-D-ribose 1-phosphate	C5H11O7P	C5H9O7P	-2	cytosol	C00672
C00680[c]	Meso-Diaminoheptanedioate	C7H14N2O4	C7H14N2O4	0	cytosol	C00680
C00681[c]	Lysophosphatidic acid	C4H8O7PR	C4H6O7PR	-2	cytosol	C00681
C00688[c]	dTDP-4-oxo-L-rhamnose	C16H24N2O15P2	C16H22N2O15P2	-2	cytosol	C00688
C00692[c]	UDP-N-acetyl-alpha-D-muramoyl-L-alanyl-D-glutamate	C28H43N5O23P2	C28H39N5O23P2	-4	cytosol	C00692
C00697[c]	Nitrogen	N2	N2	0	cytosol	C00697
C00697[p]	Nitrogen	N2	N2	0	periplam	C00697
C00700[c]	Xanthosine 5'-triphosphate	C10H15N4O15P3	C10H15N4O15P3	-4	cytosol	C00700
C00705[c]	2'-Deoxycytidine 5'-diphosphate	C9H15N3O10P2	C9H12N3O10P2	-3	cytosol	C00705
C00712[c]	(9Z)-Octadecenoicacid	C18H34O2	C18H33O2	-1	cytosol	C00712
C00718[c]	1,4-alpha-D-Glucan	C6H12O6	C6H12O6	0	cytosol	C00718
C00726[c]	Nitrile	CNR	CNR	0	cytosol	C00726
C00748[c]	Siroheme	C42H44FeN4O16	C42H36FeN4O16	-8	cytosol	C00748
C00750[c]	Spermine	C10H26N4	C10H30N4	4	cytosol	C00750
C00751[c]	Supraene	C30H50	C30H50	0	cytosol	C00751
C00791[c]	Creatinine	C4H7N3O	C4H7N3O	0	cytosol	C00791
C00792[c]	D-Arginine	C6H14N4O2	C6H15N4O2	1	cytosol	C00792
C00810[c]	(R)-3-Hydroxybutan-2-one	C4H8O2	C4H8O2	0	cytosol	C00810
C00826[c]	Pretyrosine	C10H13NO5	C10H12NO5	-1	cytosol	C00826
C00828[c]	Vitamin K2	C16H16O2(C5H8)n	C16H16O2(C5H8)n	0	cytosol	C00828
C00831[c]	Pantetheine	C11H22N2O4S	C11H22N2O4S	-2	cytosol	C00831
C00842[c]	DTDP-alpha-D-glucose	C16H26N2O16P2	C16H24N2O16P2	-2	cytosol	C00842
C00844[c]	Prunasin	C14H17NO6	C14H17NO6	0	cytosol	C00844
C00853[c]	Cob(I)alamin;	C62H89CoN13O14P	C62H88CoN13O14P	-1	cytosol	C00853
C00857[c]	Deamido-NAD	C21H27N6O15P2	C21H25N6O15P2	-2	cytosol	C00857
C00860[c]	L-Histidinol	C6H11N3O	C6H12N3O	1	cytosol	C00860
C00862[c]	Methanofuran	C34H44N4O15	C34H40N4O15	-4	cytosol	C00862
C00864[c]	Pantothenate	C9H17NO5	C9H16NO5	-1	cytosol	C00864
C00870[c]	4-Hydroxynitrobenzene	C6H5NO3	C6H5NO3	0	cytosol	C00870
C00881[c]	Deoxycytidine	C9H13N3O4	C9H13N3O4	0	cytosol	C00881
C00882[c]	3'-Dephospho-CoA	C21H35N7O13P2S	C21H33N7O13P2S	-2	cytosol	C00882
C00887[c]	Nitrous oxide;	N2O	N2O	0	cytosol	C00887
C00900[c]	2-Acetolactate	C5H8O4	C5H7O4	-1	cytosol	C00900
C00921[c]	7,8-Dihydropteroate	C14H14N6O3	C14H13N6O3	-1	cytosol	C00921
C00931[c]	Porphobilinogen	C10H14N2O4	C10H13N2O4	-1	cytosol	C00931
C00940[c]	2-Oxoglutaramate	C5H7NO4	C5H6NO4	-1	cytosol	C00940
C00940[e]	2-Oxoglutaramate	C5H7NO4	C5H6NO4	-1	extracellular	C00940
C00944[c]	Porphobilinogen	C7H10O6	C7H9O6	-1	cytosol	C00944
C00954[c]	Indoleacetic acid	C10H9NO2	C10H8NO2	-1	cytosol	C00954
C00957[c]	3-Mercaptopyruvate	C3H4O3S	C3H3O3S	-1	cytosol	C00957
C00957[e]	3-Mercaptopyruvate	C3H4O3S	C3H3O3S	-1	extracellular	C00957
C00963[c]	beta-D-Glucoside	C6H11O6R	C6H11O6R	0	cytosol	C00963
C00966[c]	2-Dehydropantoate	C6H10O4	C6H9O4	-1	cytosol	C00966
C00979[c]	O3-Acetyl-L-serine	C5H9NO4	C5H9NO4	0	cytosol	C00979
C00988[c]	Phosphoglycolic acid	C2H5O6P	C2H5O6P	-3	cytosol	C00988
C00993[c]	D-Ala-D-Ala	C6H12N2O3	C6H12N2O3	0	cytosol	C00993
C00997[c]	Ferricytochromec2				cytosol	C00997
C01000[c]	Ferrocytochromec2				cytosol	C01000
C01001[c]	Formylmethanofuran	C35H44N4O16	C35H44N4O16	-5	cytosol	C01001
C01005[c]	Dexfosfoserine	C3H8NO6P	C3H5NO6P	-3	cytosol	C01005
C01024[c]	Hydroxymethylbilane	C40H46N4O17	C40H42N4O17	-4	cytosol	C01024
C01037[c]	7,8-Diaminopelargonic acid;	C9H20N2O2	C9H20N2O2	0	cytosol	C01037
C01050[c]	UDP-N-acetylmuramic acid;	C20H31N3O19P2	C20H31N3O19P2	-3	cytosol	C01050
C01051[c]	Uroporphyrinogen III	C40H44N4O16	C40H36N4O16	-8	cytosol	C01051
C01054[c]	(S)-2,3-Epoxysqualene	C30H50O	C30H50O	0	cytosol	C01054
C01063[c]	Pimeloyl-CoA	C28H46N7O19P3S	C28H41N7O19P3S	-5	cytosol	C01063
C01079[c]	Protoporphyrinogen IX	C34H40N4O4	C34H38N4O4	-2	cytosol	C01079
C01081[c]	Thiamine phosphate	C12H18N4O4PS	C12H17N4O4PS	-1	cytosol	C01081
C01092[c]	8-Amino-7-oxononanoate	C9H17NO3	C9H17NO3	0	cytosol	C01092
C01094[c]	D-Fructose 1-phosphate	C6H13O9P	C6H11O9P	-2	cytosol	C01094
C01097[c]	D-Tagatose 6-phosphate	C6H13O9P	C6H11O9P	-2	cytosol	C01097
C01100[c]	L-Histidinol phosphate	C6H12N3O4P	C6H11N3O4P	-1	cytosol	C01100
C01102[c]	O-Phospho-L-homoserine	C4H10NO6P	C4H8NO6P	-2	cytosol	C01102
C01103[c]	Orotidine 5'-phosphate;	C10H13N2O11P	C10H10N2O11P	-3	cytosol	C01103
C01110[c]	2-Oxo-5-aminovalerate	C5H9NO3	C5H9NO3	0	cytosol	C01110
C01112[c]	D-Arabinose 5-phosphate	C5H11O8P	C5H9O8P	-2	cytosol	C01112
C01118[c]	O-Succinylhomoserine	C8H13NO6	C8H12NO6	-1	cytosol	C01118
C01127[c]	4-Hydroxy-2-oxoglutaric acid	C5H6O6	C5H4O6	-2	cytosol	C01127
C01134[c]	D-Pantetheine 4'-phosphate	C11H23N2O7PS	C11H21N2O7PS	-2	cytosol	C01134
C01137[c]	Decarboxy-AdoMet	C14H23N6O3S	C14H25N6O3S	2	cytosol	C01137
C01157[c]	trans-4-Hydroxy-L-proline	C5H9NO3	C5H9NO3	0	cytosol	C01157
C01164[c]	Cholesta-5,7-dien-3beta-ol	C27H44O	C27H44O	0	cytosol	C01164
C01165[c]	L-Glutamate gamma-semialdehyde	C5H9NO3	C5H9NO3	0	cytosol	C01165
C01172[c]	Beta-D-Glucose 6-phosphate	C6H13O9P	C6H11O9P	-2	cytosol	C01172
C01177[c]	Inositol1-phosphate	C6H13O9P	C6H11O9P	-2	cytosol	C01177
C01179[c]	p-Hydroxyphenylpyruvic acid	C9H8O4	C9H7O4	-1	cytosol	C01179
C01180[c]	2-Oxo-4-methylthiobutanoic acid	C5H8O3S	C5H7O3S	-1	cytosol	C01180
C01182[c]	D-Ribulose 1,5-bisphosphate	C5H12O11P2	C5H8O11P2	-4	cytosol	C01182
C01185[c]	Nicotinic acid ribonucleotide	C11H15NO9P	C11H13NO9P	-2	cytosol	C01185
C01187[c]	3-Deoxyoctulosonic acid	C8H14O8	C8H13O8	-1	cytosol	C01187
C01189[c]	Lathosterol	C27H46O	C27H46O	0	cytosol	C01189
C01209[c]	Malonyl-[acyl-carrierprotein]	C3H3O3SR	C3H2O3SR	-1	cytosol	C01209
C01212[c]	UDP-N-acetyl-alpha-D-muramoyl-L-alanine	C23H36N4O20P2	C23H33N4O20P2	-3	cytosol	C01212
C01217[c]	Tetrahydromethanopterin	C30H45N6O16P	C30H42N6O16P	-3	cytosol	C01217
C01222[c]	GDP-4-dehydro-6-deoxy-alpha-D-mannose	C16H23N5O15P2	C16H21N5O15P2	-2	cytosol	C01222
C01228[c]	Guanosine 5'-diphosphate,3'-diphosphate	C10H17N5O17P4	C10H11N5O17P4	-6	cytosol	C01228
C01233[c]	Glycerophosphoethanolamine	C5H14NO6P	C5H14NO6P	0	cytosol	C01233
C01236[c]	6-Phospho-D-glucono-1,5-lactone	C6H11O9P	C6H9O9P	-2	cytosol	C01236
C01241[c]	Phosphatidyl-N-methylethanolamine	C8H14NO8PR2	C8H14NO8PR2	0	cytosol	C01241
C01242[c]	H-Protein-S-aminomethyldihydrolipoyllysine	C9H19N2OS2R	C9H20N2OS2R	1	cytosol	C01242
C01250[c]	2-Acetamido-5-oxopentanoate	C7H11NO4	C7H10NO4	-1	cytosol	C01250
C01251[c]	Homocitric acid	C7H10O7	C7H7O7	-3	cytosol	C01251
C01260[c]	P1,P4-Bis(5'-adenosyl)tetraphosphate	C20H28N10O19P4	C20H24N10O19P4	-4	cytosol	C01260
C01267[c]	Imidazole-acetol phosphate	C6H9N2O5P	C6H7N2O5P	-2	cytosol	C01267
C01268[c]	5-Amino-6-(5-phosphoribosylamino)uracil	C9H15N4O9P	C9H13N4O9P	-2	cytosol	C01268
C01269[c]	O5-(1-Carboxyvinyl)-3-phosphoshikimate	C10H13O10P	C10H9O10P	-4	cytosol	C01269
C01274[c]	5-Formyl-5,6,7,8-tetrahydromethanopterin	C31H45N6O17P	C31H42N6O17P	-3	cytosol	C01274
C01279[c]	4-Amino-2-methyl-5-pyrimidinemethanol	C6H9N3O	C6H9N3O	0	cytosol	C01279
C01300[c]	2-Amino-4-hydroxy-6-hydroxymethyl-7,8-dihydropteridine	C7H9N5O2	C7H9N5O2	0	cytosol	C01300
C01302[c]	1-(2-Carboxyphenylamino)-1-deoxy-D-ribulose 5-phosphate	C12H16NO9P	C12H13NO9P	-3	cytosol	C01302
C01304[c]	2,5-Diamino-6-(1-D-ribosylamino)pyrimidin-4(3H)-one 5'-phosphate	C9H16N5O8P	C9H14N5O8P	-2	cytosol	C01304
C01322[c]	Organic halide	XR	XR	0	cytosol	C01322
C01335[c]	ROH	HOR	HOR	0	cytosol	C01335
C01344[c]	2'-Deoxyinosine 5'-diphosphate	C10H14N4O10P2	C10H11N4O10P2	-3	cytosol	C01344
C01345[c]	2'-Deoxyinosine 5'-triphosphate	C10H15N4O13P3	C10H11N4O13P3	-4	cytosol	C01345
C01346[c]	2'-Deoxyuridine 5'-diphosphate	C9H14N2O11P2	C9H11N2O11P2	-3	cytosol	C01346
C01353[c]	Carbonicacid	H2CO3	HCO3	-1	cytosol	C01353
C01401[c]	Alanine	C3H7NO2	C3H7NO2	0	cytosol	C01401
C01419[c]	L-Cysteinylglycine	C5H10N2O3S	C5H10N2O3S	0	cytosol	C01419
C01438[c]	Methane	CH4	CH4	0	cytosol	C01438
C01455[c]	Toluene	C7H8	C7H8	0	cytosol	C01455
C01467[c]	3-Cresol	C7H8O	C7H8O	0	cytosol	C01467
C01528[c]	Selenide	H2Se	Se	-2	cytosol	C01528
C01530[c]	Octadecanoicacid	C18H36O2	C18H35O2	-1	cytosol	C01530
C01548[c]	Ethyne	C2H2	C2H2	0	cytosol	C01548
C01594[c]	Linamarin	C10H17NO6	C10H17NO6	0	cytosol	C01594
C01647[c]	tRNA(Met)				cytosol	C01647
C01672[c]	Cadaverine	C5H14N2	C5H16N2	2	cytosol	C01672
C01674[c]	N,N'-Diacetylchitobiose	C16H28N2O11	C16H28N2O11	0	cytosol	C01674
C01724[c]	Lanosterol	C30H50O	C30H50O	0	cytosol	C01724
C01753[c]	beta-Sitosterol	C29H50O	C29H50O	0	cytosol	C01753
C01755[c]	Thiocyanic acid	CHNS	CNS	-1	cytosol	C01755
C01762[c]	Xanthosine	C10H12N4O6	C10H12N4O6	0	cytosol	C01762
C01789[c]	Campesterol	C28H48O	C28H48O	0	cytosol	C01789
C01802[c]	Desmosterol	C27H44O	C27H44O	0	cytosol	C01802
C01847[c]	Reduced FMN	C17H23N4O9P	C17H21N4O9P	-2	cytosol	C01847
C01909[c]	Desthiobiotin	C10H18N2O3	C10H17N2O3	-1	cytosol	C01909
C01929[c]	Histidinal	C6H9N3O	C6H10N3O	1	cytosol	C01929
C01943[c]	Obtusifoliol	C30H50O	C30H50O	0	cytosol	C01943
C01962[c]	S-Mercapto-L-cysteine	C3H7NO2S2	C3H7NO2S2	0	cytosol	C01962
C02051[c]	Lipoylprotein	C8H14NOS2R	C8H14NOS2R	0	cytosol	C02051
C02059[c]	Vitamin K1	C31H46O2	C31H46O2	0	cytosol	C02059
C02191[c]	Porphyrinogen IX	C34H34N4O4	C34H32N4O4	-2	cytosol	C02191
C02226[c]	Methylmaleic acid	C5H6O4	C5H4O4	-2	cytosol	C02226
C02265[c]	D-Phenylalanine	C9H11NO2	C9H11NO2	0	cytosol	C02265
C02291[c]	Cystathionine	C7H14N2O4S	C7H14N2O4S	0	cytosol	C02291
C02320[c]	R-S-Glutathione	C10H16N3O6SR	C10H15N3O6SR	-1	cytosol	C02320
C02336[c]	Fructose	C6H12O6	C6H12O6	0	cytosol	C02336
C02356[c]	(S)-2-Aminobutyric acid	C4H9NO2	C4H9NO2	0	cytosol	C02356
C02376[c]	5-Methylcytosine	C5H7N3O	C5H7N3O	0	cytosol	C02376
C02430[c]	L-Methionyl-tRNA	C20H30N6O11PSR(C5H8O6PR)n	C20H30N6O11PSR(C5H8O6PR)n		cytosol	C02430
C02463[c]	Dihydrosirohydrochlorin	C42H48N4O16	C42H40N4O16	-8	cytosol	C02463
C02504[c]	3-Carboxy-3-hydroxyisocaproate	C7H12O5	C7H10O5	-2	cytosol	C02504
C02512[c]	L-beta-Cyanoalanine	C4H6N2O2	C4H6N2O2	0	cytosol	C02512
C02514[c]	3-Fumarylpyruvate	C7H6O6	C7H4O6	-2	cytosol	C02514
C02565[c]	N-Methylimidazolidine-2,4-dione	C4H6N2O2	C4H6N2O2	0	cytosol	C02565
C02612[c]	D-Citramalate	C5H8O5	C5H6O5	-2	cytosol	C02612
C02631[c]	2-Isopropylmaleate	C7H10O4	C7H8O4	-2	cytosol	C02631
C02637[c]	3-Dehydroshikimate	C7H8O5	C7H7O5	-1	cytosol	C02637
C02659[c]	2-Hydroxyisobutyronitrile	C4H7NO	C4H7NO	0	cytosol	C02659
C02713[c]	N-Acetylmuramate	C11H19NO8	C11H18NO8	-1	cytosol	C02713
C02737[c]	Phosphatidylserine	C8H12NO10PR2	C8H12NO10PR2	-1	cytosol	C02737
C02739[c]	Phosphoribosyl-ATP	C15H25N5O20P4	C15H19N5O20P4	-6	cytosol	C02739
C02741[c]	Phosphoribosyl-AMP	C15H23N5O14P2	C15H19N5O14P2	-4	cytosol	C02741
C02745[c]	Reducedflavodoxin	XH2	XH2		cytosol	C02745
C02823[c]	Cyanocobalamin	C63H88CoN14O14P	C63H88CoN14O14P	0	cytosol	C02823
C02869[c]	Oxidizedflavodoxin	X	X		cytosol	C02869
C02876[c]	Propionyl phosphate	C3H7O5P	C3H5O5P	-2	cytosol	C02876
C02909[c]	2-Hydroxymethylnaphthalene	C11H10O	C11H10O	0	cytosol	C02909
C02938[c]	3-Indoleacetonitrile;	C10H8N2	C10H8N2	0	cytosol	C02938
C02962[c]	D-Allose6-phosphate	C6H13O9P	C6H11O9P	-2	cytosol	C02962
C02972[c]	Dihydrolipoylprotein	C8H16NOS2R	C8H16NOS2R	0	cytosol	C02972
C03082[c]	4-Phospho-L-aspartate	C4H8NO7P	C4H6NO7P	-2	cytosol	C03082
C03089[c]	S-Methyl-5-thio-D-ribose	C6H12O4S	C6H12O4S	0	cytosol	C03089
C03090[c]	5-Phosphoribosylamine	C5H12NO7P	C5H11NO7P	-1	cytosol	C03090
C03114[c]	Dimethylbenzimidazole	C9H10N2	C9H10N2	0	cytosol	C03114
C03150[c]	N-Ribosylnicotinamide	C11H15N2O5	C11H15N2O5	1	cytosol	C03150
C03175[c]	Shikimate 5-phosphate	C7H11O8P	C7H8O8P	-3	cytosol	C03175
C03193[c]	(5-L-Glutamyl)-peptide	C7H11N2O5R(C2H2NOR)n	C7H10N2O5R(C2H2NOR)n	-1	cytosol	C03193
C03194[c]	(R)-1-Aminopropan-2-ol	C3H9NO	C3H10NO	1	cytosol	C03194
C03232[c]	3-Phosphohydroxypyruvic acid	C3H5O7P	C3H2O7P	-3	cytosol	C03232
C03263[c]	Coproporphyrinogen III	C36H44N4O8	C36H40N4O8	-4	cytosol	C03263
C03273[c]	5-Oxopentanoate	C5H8O3	C5H7O3	-1	cytosol	C03273
C03287[c]	L-Glutamate 5-phosphate	C5H10NO7P	C5H8NO7P	-2	cytosol	C03287
C03294[c]	N-Formylmethionyl-tRNA	C21H30N6O12PSRC5H8O6PR	C21H30N6O12PSRC5H8O6PR		cytosol	C03294
C03313[c]	Phytonadiol	C31H48O2	C31H48O2	0	cytosol	C03313
C03319[c]	DTDP-beta-L-rhamnose	C16H26N2O15P2	C16H26N2O15P2	-2	cytosol	C03319
C03360[c]	4-Nitrophenyl phosphate	C6H6NO6P	C6H4NO6P	-1	cytosol	C03360
C03373[c]	5-Amino-1-(5-phospho-D-ribosyl)imidazole	C8H14N3O7P	C8H13N3O7P	-1	cytosol	C03373
C03375[c]	Norspermidine	C6H17N3	C6H20N3	3	cytosol	C03375
C03393[c]	4-Phosphoerythronate	C4H9O8P	C4H6O8P	-3	cytosol	C03393
C03406[c]	L-Arginosuccinic acid	C10H18N4O6	C10H17N4O6	-1	cytosol	C03406
C03428[c]	Presqualene diphosphate	C30H52O7P2	C30H49O7P2	-3	cytosol	C03428
C03451[c]	S-D-Lactoylglutathione	C13H21N3O8S	C13H20N3O8S	-1	cytosol	C03451
C03479[c]	Folinic acid	C20H23N7O7	C20H21N7O7	-2	cytosol	C03479
C03492[c]	D-4'-Phosphopantothenate	C9H18NO8P	C9H15NO8P	-3	cytosol	C03492
C03506[c]	Indole-3-glycerol phosphate	C11H14NO6P	C11H12NO6P	-2	cytosol	C03506
C03539[c]	S-Ribosyl-L-homocysteine;	C9H17NO6S	C9H17NO6S	0	cytosol	C03539
C03546[c]	myo-Inositol4-phosphate	C6H13O9P	C6H11O9P	-2	cytosol	C03546
C03684[c]	6-Pyruvoyl-5,6,7,8-tetrahydropterin	C9H11N5O3	C9H11N5O3	0	cytosol	C03684
C03722[c]	Quinolinate	C7H5NO4	C7H5NO4	-2	cytosol	C03722
C03740[c]	L-gamma-Glutamyl-L-amino acid	C7H11N2O5R	C7H11N2O5R	-1	cytosol	C03740
C03741[c]	L-Glutamate 1-semialdehyde	C5H9NO3	C5H9NO3	0	cytosol	C03741
C03742[c]	(S)-4-Hydroxymandelonitrile	C8H7NO2	C8H7NO2	0	cytosol	C03742
C03771[c]	2-Oxoarginine	C6H11N3O3	C6H11N3O3	0	cytosol	C03771
C03785[c]	D-Tagatose 1,6-bisphosphate	C6H14O12P2	C6H10O12P2	-4	cytosol	C03785
C03794[c]	Adenylosuccinic acid	C14H18N5O11P	C14H14N5O11P	-4	cytosol	C03794
C03838[c]	Glycinamide ribonucleotide	C7H15N2O8P	C7H13N2O8P	-2	cytosol	C03838
C03845[c]	Cholestenol	C27H46O	C27H46O	0	cytosol	C03845
C03892[c]	Phosphatidylglycerophosphate	C8H14O13P2R2	C8H11O13P2R2	-3	cytosol	C03892
C03912[c]	1-Pyrroline-5-carboxylate	C5H7NO2	C5H6NO2	-1	cytosol	C03912
C03939[c]	Acetyl-[acyl-carrierprotein]	C2H3OSR	C2H3OSR	0	cytosol	C03939
C03972[c]	2,3,4,5-Tetrahydrodipicolinate	C7H9NO4	C7H7NO4	-2	cytosol	C03972
C04006[c]	Inositol 3-phosphate	C6H13O9P	C6H11O9P	-2	cytosol	C04006
C04039[c]	2,3-Dihydroxy-isovaleric acid	C5H10O4	C5H9O4	-1	cytosol	C04039
C04051[c]	5-Amino-4-imidazolecarboxyamide	C4H6N4O	C4H6N4O	0	cytosol	C04051
C04079[c]	N-Pantothenoylcysteine	C12H22N2O6S	C12H21N2O6S	-1	cytosol	C04079
C04088[c]	Octadecanoyl-[acyl-carrierprotein]	C18H35OSR	C18H35OSR	0	cytosol	C04088
C04121[c]	CMP-3-deoxy-D-manno-octulosonate	C17H26N3O15P	C17H24N3O15P	-2	cytosol	C04121
C04122[c]	(R)-1-Aminopropan-2-yl phosphate	C3H10NO4P	C3H9NO4P	-1	cytosol	C04122
C04133[c]	N-Acetyl-L-glutamyl 5-phosphate	C7H12NO8P	C7H9NO8P	-3	cytosol	C04133
C04144[c]	Tetrahydropteroyltri-L-glutamate	C29H37N9O12	C29H33N9O12	-4	cytosol	C04144
C04146[c]	all-trans-Octaprenyl diphosphate;	C40H68O7P2	C40H66O7P2	-2	cytosol	C04146
C04180[c]	cis-Dec-3-enoyl-[acp]	C10H17OSR	C10H17OSR	0	cytosol	C04180
C04181[c]	2-Oxo-3-hydroxyisovalerate	C5H8O4	C5H7O4	-1	cytosol	C04181
C04188[c]	S-Methyl-5-thio-D-ribose 1-phosphate;	C6H13O7PS	C6H11O7PS	-2	cytosol	C04188
C04225[c]	cis-2-Methylaconitate	C7H8O6	C7H5O6	-3	cytosol	C04225
C04236[c]	3-Carboxy-4-methyl-2-oxopentanoate;	C7H10O5	C7H8O5	-2	cytosol	C04236
C04246[c]	But-2-enoyl-[acyl-carrierprotein]	C4H5OSR	C4H5OSR	0	cytosol	C04246
C04272[c]	(2R)-2,3-Dihydroxy-3-methylbutanoate	C5H10O4	C5H9O4	-1	cytosol	C04272
C04281[c]	3-Hydroxy-L-1-pyrroline-5-carboxylate;	C5H7NO3	C5H6NO3	-1	cytosol	C04281
C04302[c]	N-(5-Phospho-D-ribosyl)anthranilate	C12H16NO9P	C12H13NO9P	-3	cytosol	C04302
C04308[c]	Phosphatidyl-N-dimethylethanolamine	C9H16NO8PR2	C9H16NO8PR2	0	cytosol	C04308
C04327[c]	4-Methyl-5-(2-phosphoethyl)thiazole	C6H10NO4PS	C6H8NO4PS	-2	cytosol	C04327
C04330[c]	N5,N10-Methenyltetrahydromethanopterin	C31H44N6O16P	C31H41N6O16P	-2	cytosol	C04330
C04332[c]	6,7-Dimethyl-8-(D-ribityl)lumazine	C13H18N4O6	C13H18N4O6	0	cytosol	C04332
C04348[c]	(3S)-3-Carboxy-3-hydroxypropionyl-CoA	C25H40N7O20P3S	C25H35N7O20P3S	-5	cytosol	C04348
C04352[c]	N-[(R)-4'-Phosphopantothenoyl]-L-cysteine	C12H23N2O9PS	C12H20N2O9PS	-3	cytosol	C04352
C04376[c]	5'-Phosphoribosyl-N-formylglycinamide	C8H15N2O9P	C8H13N2O9P	-2	cytosol	C04376
C04377[c]	N5,N10-Methylenetetrahydromethanopterin	C31H45N6O16P	C31H42N6O16P	-3	cytosol	C04377
C04411[c]	2-D-threo-Hydroxy-3-carboxy-isocaproate	C7H12O5	C7H10O5	-2	cytosol	C04411
C04419[c]	Carboxybiotin-carboxyl-carrierprotein	C18H26N5O6SR2	C18H25N5O6SR2	-1	cytosol	C04419
C04421[c]	N-Succinyl-L-2,6-diaminopimelate	C11H18N2O7	C11H16N2O7	-2	cytosol	C04421
C04425[c]	S-Adenosyl-4-methylthio-2-oxobutanoate	C15H20N5O6S	C15H19N5O6S	0	cytosol	C04425
C04442[c]	2-Dehydro-3-deoxy-D-gluconate 6-phosphate	C6H11O9P	C6H8O9P	-3	cytosol	C04442
C04454[c]	5-Amino-6-(5-phospho-D-ribitylamino)uracil	C9H17N4O9P	C9H15N4O9P	-2	cytosol	C04454
C04462[c]	N-Succinyl-L-2-amino-6-oxopimelate;	C11H15NO8	C11H12NO8	-3	cytosol	C04462
C04478[c]	2-Dehydro-3-deoxy-D-octonate 8-phosphate	C8H15O11P	C8H12O11P	-3	cytosol	C04478
C04489[c]	5-Methyltetrahydropteroyltri-L-glutamate	C30H39N9O12	C30H35N9O12	-4	cytosol	C04489
C04494[c]	Guanosine 5'-triphosphate,3'-diphosphate	C10H18N5O20P5	C10H11N5O20P5	-7	cytosol	C04494
C04501[c]	N-Acetyl-alpha-D-glucosamine 1-phosphate	C8H16NO9P	C8H14NO9P	-2	cytosol	C04501
C04556[c]	4-Amino-5-phosphomethyl-2-methylpyrimidine	C6H10N3O4P	C6H8N3O4P	-2	cytosol	C04556
C04574[c]	ditrans,octacis-Undecaprenyl diphosphate	C55H92O7P2	C55H89O7P2	-3	cytosol	C04574
C04582[c]	S-Methyl-5-thio-D-ribulose 1-phosphate	C6H13O7PS	C6H13O7PS	-2	cytosol	C04582
C04593[c]	Methylisocitric acid	C7H10O7	C7H7O7	-3	cytosol	C04593
C04618[c]	(3R)-3-Hydroxybutanoyl-[acyl-carrierprotein]	C4H7O2SR	C4H7O2SR	0	cytosol	C04618
C04619[c]	(3R)-3-Hydroxydecanoyl-[acyl-carrierprotein]	C10H19O2SR	C10H19O2SR	0	cytosol	C04619
C04620[c]	(3R)-3-Hydroxyoctanoyl-[acyl-carrierprotein]	C8H15O2SR	C8H15O2SR	0	cytosol	C04620
C04631[c]	UDP-N-acetylglucosamine enolpyruvate;	C20H29N3O19P2	C20H26N3O19P2	-3	cytosol	C04631
C04633[c]	(3R)-3-Hydroxypalmitoyl-[acyl-carrierprotein]	C16H31O2SR	C16H31O2SR	0	cytosol	C04633
C04640[c]	2-(Formamido)-N1-(5-phospho-D-ribosyl)acetamidine	C8H16N3O8P	C8H14N3O8P	-2	cytosol	C04640
C04652[c]	UDP-2,3-bis(beta-hydroxymyristoyl)-D-glucosamine;	C43H77N3O20P2	C43H75N3O20P2	-2	cytosol	C04652
C04666[c]	D-erythro-Imidazole-glycerol phosphate	C6H11N2O6P	C6H9N2O6P	-2	cytosol	C04666
C04677[c]	5-Amino-1-(5-phospho-D-ribosyl)imidazole-4-carboxamide	C9H15N4O8P	C9H13N4O8P	-2	cytosol	C04677
C04688[c]	beta-Hydroxymyristyl-[acyl-carrier protein];	C14H27O2SR	C14H27O2SR	0	cytosol	C04688
C04691[c]	3-Deoxy-D-arabino-heptulosonic acid 7-phosphate	C7H13O10P	C7H10O10P	-3	cytosol	C04691
C04702[c]	UDP-N-acetylmuramoyl-L-alanyl-D-glutamyl-L-lysyl-D-alanyl-D-alanine	C40H65N9O26P2	C40H62N9O26P2	-3	cytosol	C04702
C04732[c]	5-Amino-6-(1-D-ribitylamino)uracil;	C9H16N4O6	C9H16N4O6	0	cytosol	C04732
C04734[c]	5-Formamido-1-(5-phospho-D-ribosyl)imidazole-4-carboxamide;	C10H15N4O9P	C10H13N4O9P	-2	cytosol	C04734
C04738[c]	UDP-3-O-(beta-hydroxymyristoyl)-N-acetylglucosamine;	C31H53N3O19P2	C31H51N3O19P2	-2	cytosol	C04738
C04742[c]	(15S)-15-Hydroxy-5,8,11-cis-13-trans-eicosatetraenoate;	C20H32O3	C20H31O3	-1	cytosol	C04742
C04751[c]	5-Amino-1-(5-phospho-D-ribosyl)imidazole-4-carboxylate	C9H14N3O9P	C9H12N3O9P	-2	cytosol	C04751
C04752[c]	4-Amino-2-methyl-5-diphosphomethylpyrimidine	C6H11N3O7P2	C6H8N3O7P2	-3	cytosol	C04752
C04778[c]	alpha-Ribazole 5'-phosphate	C14H19N2O7P	C14H17N2O7P	-2	cytosol	C04778
C04805[c]	5-Hydroxyeicosatetraenoate;	C20H32O3	C20H31O3	-1	cytosol	C04805
C04807[c]	7,8-Dihydropterin pyrophosphate	C7H11N5O8P2	C7H8N5O8P2	-3	cytosol	C04807
C04823[c]	1-(5'-Phosphoribosyl)-5-amino-4-(N-succinocarboxamide)-imidazole;	C13H19N4O12P	C13H19N4O12P	-4	cytosol	C04823
C04824[c]	2,3-Bis(3-hydroxytetradecanoyl)-alpha-D-glucosaminyl 1-phosphate	C34H66NO12P	C34H64NO12P	-2	cytosol	C04824
C04851[c]	MurAc(oyl-L-Ala-D-gamma-Glu-L-Lys-D-Ala-D-Ala)-diphospho-undecaprenol;	C86H143N7O21P2	C86H140N7O21P2	-3	cytosol	C04851
C04874[c]	7,8-Dihydroneopterin	C9H13N5O4	C9H13N5O4	0	cytosol	C04874
C04877[c]	UDP-N-acetylmuramoyl-L-alanyl-gamma-D-glutamyl-meso-2,6-diaminopimelate;	C35H55N7O26P2	C35H51N7O26P2	-4	cytosol	C04877
C04882[c]	UDP-N-acetylmuramoyl-L-alanyl-D-gamma-glutamyl-6-carboxy-L-lysyl-D-alanyl-D-alanine	C41H65N9O28P2	C41H61N9O28P2	-4	cytosol	C04882
C04895[c]	7,8-Dihydroneopterin 3'-triphosphate;	C9H16N5O13P3	C9H14N5O13P3	-2	cytosol	C04895
C04896[c]	5-(5-Phospho-D-ribosylaminoformimino)-1-(5-phosphoribosyl)-imidazole-4-carboxamide;	C15H25N5O15P2	C15H21N5O15P2	-4	cytosol	C04896
C04916[c]	5-[(5-Phospho-1-deoxy-D-ribulos-1-ylamino)methylideneamino]-1-(5-phospho-beta-D-ribosyl)imidazole-4-carboxamide	C15H25N5O15P2	C15H21N5O15P2	-4	cytosol	C04916
C04919[c]	Lipid A disaccharide bisphosphate;	C68H130N2O23P2	C68H126N2O23P2	-4	cytosol	C04919
C04932[c]	Lipid A disaccharide;	C68H129N2O20P	C68H127N2O20P	-2	cytosol	C04932
C05107[c]	7-Dehydrodesmosterol;	C27H42O	C27H42O	0	cytosol	C05107
C05108[c]	14-Demethyllanosterol;	C29H48O	C29H48O	0	cytosol	C05108
C05109[c]	24,25-Dihydrolanosterol	C30H52O	C30H52O	0	cytosol	C05109
C05125[c]	2-(alpha-Hydroxyethyl)thiamine diphosphate;	C14H23N4O8P2S	C14H20N4O8P2S	-2	cytosol	C05125
C05143[c]	(S)-4-Hydroxymandelonitrile beta-D-glucoside	C14H17NO7	C14H17NO7	0	cytosol	C05143
C05198[c]	5'-Deoxyadenosine	C10H13N5O3	C10H13N5O3	0	cytosol	C05198
C05223[c]	Dodecanoyl-[acyl-carrierprotein]	C12H23OSR	C12H23OSR	0	cytosol	C05223
C05335[c]	L-Selenomethionine	C5H11NO2Se	C5H11NO2Se	0	cytosol	C05335
C05336[c]	Selenomethionyl-tRNA(Met)	C20H30N6O11PSeRC5H8O6PR	C20H30N6O11PSeRC5H8O6PR		cytosol	C05336
C05345[c]	beta-D-Fructose 6-phosphate	C6H13O9P	C6H11O9P	-2	cytosol	C05345
C05356[c]	(5S,6E,8Z,11Z,14Z)-5-Hydroperoxyicosa-6,8,11,14-tetraenoate	C20H32O4	C20H31O4	-1	cytosol	C05356
C05359[c]	Electron	e-	e-	-1	cytosol	C05359
C05378[c]	beta-D-Fructose 1,6-bisphosphate	C6H14O12P2	C6H10O12P2	-4	cytosol	C05378
C05381[c]	3-Carboxy-1-hydroxypropyl-ThPP	C16H25N4O10P2S	C16H21N4O10P2S	-3	cytosol	C05381
C05382[c]	altro-Heptulose 7-phosphate	C7H15O10P	C7H13O10P	-2	cytosol	C05382
C05437[c]	5alpha-Cholesta-8,24-dien-3beta-ol	C27H44O	C27H44O	0	cytosol	C05437
C05439[c]	5alpha-Cholesta-7,24-dien-3beta-ol	C27H44O	C27H44O	0	cytosol	C05439
C05527[c]	3-Sulfinylpyruvate	C3H4O5S	C3H3O5S	-1	cytosol	C05527
C05528[c]	3-Sulfopyruvic acid	C3H4O6S	C3H2O6S	-2	cytosol	C05528
C05576[c]	3,4-Dihydroxyphenylethyleneglycol	C8H10O4	C8H10O4	0	cytosol	C05576
C05577[c]	3,4-Dihydroxyphenylglycolaldehyde	C8H8O4	C8H8O4	0	cytosol	C05577
C05629[c]	3-Phenylpropionic acid	C9H10O2	C9H9O2	-1	cytosol	C05629
C05670[c]	Beta-Aminopropionitrile	C3H6N2	C3H7N2	1	cytosol	C05670
C05684[c]	Selenite	H2SeO3	SeO3	-2	cytosol	C05684
C05686[c]	Adenosine-5'-phosphoselenate	C10H14N5O10PSe	C10H12N5O10PSe	-2	cytosol	C05686
C05688[c]	L-Selenocysteine	C3H7NO2Se	C3H7NO2Se	0	cytosol	C05688
C05697[c]	Selenic acid	H2SeO4	SeO4	-2	cytosol	C05697
C05698[c]	Selenohomocysteine	C4H9NO2Se	C4H9NO2Se	0	cytosol	C05698
C05699[c]	L-Selenocystathionine	C7H14N2O4Se	C7H14N2O4Se	0	cytosol	C05699
C05703[c]	Methylselenol	CH4Se	CH4Se	0	cytosol	C05703
C05711[c]	Gamma-Glutamyl-beta-cyanoalanine	C9H13N3O5	C9H12N3O5	-1	cytosol	C05711
C05714[c]	Alpha-Aminopropiononitrile	C3H6N2	C3H6N2	0	cytosol	C05714
C05715[c]	4-Amino-4-cyanobutanoic acid	C5H8N2O2	C5H8N2O2	0	cytosol	C05715
C05726[c]	L-Cysteine S-conjugate	C3H6NO2SR	C3H6NO2SR	0	cytosol	C05726
C05729[c]	R-S-Cysteinylglycine	C5H9N2O3SR	C5H9N2O3SR	0	cytosol	C05729
C05744[c]	Acetoacetyl-[acp]	C4H5O2SR	C4H5O2SR	0	cytosol	C05744
C05745[c]	Butyryl-[acp]	C4H7OSR	C4H7OSR	0	cytosol	C05745
C05746[c]	3-Oxohexanoyl-[acp]	C6H9O2SR	C6H9O2SR	0	cytosol	C05746
C05747[c]	(R)-3-Hydroxyhexanoyl-[acp]	C6H11O2SR	C6H11O2SR	0	cytosol	C05747
C05748[c]	trans-Hex-2-enoyl-[acp]	C6H9OSR	C6H9OSR	0	cytosol	C05748
C05749[c]	Hexanoyl-[acp]	C6H11OSR	C6H11OSR	0	cytosol	C05749
C05750[c]	3-Oxooctanoyl-[acp]	C8H13O2SR	C8H13O2SR	0	cytosol	C05750
C05751[c]	trans-Oct-2-enoyl-[acp]	C8H13OSR	C8H13OSR	0	cytosol	C05751
C05752[c]	Octanoyl-[acyl-carrier protein]	C8H15OSR	C8H15OSR	0	cytosol	C05752
C05753[c]	3-Oxodecanoyl-[acp]	C10H17O2SR	C10H17O2SR	0	cytosol	C05753
C05754[c]	trans-Dec-2-enoyl-[acp]	C10H17OSR	C10H17OSR	0	cytosol	C05754
C05755[c]	Decanoyl-[acp]	C10H19OSR	C10H19OSR	0	cytosol	C05755
C05756[c]	3-Oxododecanoyl-[acp]	C12H21O2SR	C12H21O2SR	0	cytosol	C05756
C05757[c]	(R)-3-Hydroxydodecanoyl-[acp]	C12H23O2SR	C12H23O2SR	0	cytosol	C05757
C05758[c]	trans-Dodec-2-enoyl-[acp]	C12H21OSR	C12H21OSR	0	cytosol	C05758
C05759[c]	3-Oxotetradecanoyl-[acp]	C14H25O2SR	C14H25O2SR	0	cytosol	C05759
C05760[c]	trans-Tetradec-2-enoyl-[acp]	C14H25OSR	C14H25OSR	0	cytosol	C05760
C05761[c]	Tetradecanoyl-[acp]	C14H27OSR	C14H27OSR	0	cytosol	C05761
C05762[c]	3-Oxohexadecanoyl-[acp]	C16H29O2SR	C16H29O2SR	0	cytosol	C05762
C05763[c]	trans-Hexadec-2-enoyl-[acp]	C16H29OSR	C16H29OSR	0	cytosol	C05763
C05764[c]	Hexadecanoyl-[acp]	C16H31OSR	C16H31OSR	0	cytosol	C05764
C05766[c]	Uroporphyrinogen I	C40H44N4O16	C40H36N4O16	-8	cytosol	C05766
C05768[c]	Coproporphyrinogen I	C36H44N4O8	C36H40N4O8	-4	cytosol	C05768
C05772[c]	Precorrin 3A	C43H50N4O16	C43H42N4O16	-8	cytosol	C05772
C05773[c]	Cobyrinate	C45H59CoN4O14	C45H52CoN4O14	-6	cytosol	C05773
C05774[c]	Cobinamide	C48H72CoN11O8	C48H72CoN11O8	2	cytosol	C05774
C05775[c]	N1-(alpha-D-Ribosyl)-5,6-dimethylbenzimidazole	C14H18N2O4	C14H18N2O4	0	cytosol	C05775
C05778[c]	Sirohydrochlorin	C42H46N4O16	C42H38N4O16	-8	cytosol	C05778
C05807[c]	2-Polyprenylphenol	C11H14O(C5H8)n	C11H14O(C5H8)n	0	cytosol	C05807
C05809[c]	3-Octaprenyl-4-hydroxybenzoate	C47H70O3	C47H69O3	-1	cytosol	C05809
C05810[c]	2-Octaprenylphenol	C46H70O	C46H70O	0	cytosol	C05810
C05811[c]	2-Octaprenyl-6-hydroxyphenol	C46H70O2	C46H70O2	0	cytosol	C05811
C05812[c]	2-Octaprenyl-6-methoxyphenol	C47H72O2	C47H72O2	0	cytosol	C05812
C05813[c]	2-Octaprenyl-6-methoxy-1,4-benzoquinone	C47H70O3	C47H70O3	0	cytosol	C05813
C05814[c]	2-Octaprenyl-3-methyl-6-methoxy-1,4-benzoquinone	C48H72O3	C48H72O3	0	cytosol	C05814
C05815[c]	2-Octaprenyl-3-methyl-5-hydroxy-6-methoxy-1,4-benzoquinone	C48H72O4	C48H72O4	0	cytosol	C05815
C05818[c]	2-Demethylmenaquinone	C15H14O2(C5H8)n	C15H14O2(C5H8)n	0	cytosol	C05818
C05819[c]	Reduced vitamin K2	C16H18O2(C5H8)n	C16H18O2(C5H8)n	0	cytosol	C05819
C05824[c]	S-Sulfo-L-cysteine	C3H7NO5S2	C3H6NO5S2	-1	cytosol	C05824
C05840[c]	Iminosuccinate	C4H5NO4	C4H4NO4	-1	cytosol	C05840
C05841[c]	Beta-D-Ribosylnicotinate	C11H14NO6 (1)	C11H14NO6 (1)	0	cytosol	C05841
C05844[c]	Glutaurine	C7H14N2O6S	C7H13N2O6S	-1	cytosol	C05844
C05847[c]	Polyprenyl diphosphate	C5H12O7P2(C5H8)n	C5H9O7P2(C5H8)n	-3	cytosol	C05847
C05848[c]	4-Hydroxy-3-polyprenylbenzoate	C12H14O3(C5H8)n	C12H13O3(C5H8)n	-1	cytosol	C05848
C05892[c]	UDP-N-acetyl-alpha-D-muramoyl-L-alanyl-gamma-D-glutamyl-L-lysine	C34H55N7O24P2	C34H52N7O24P2	-3	cytosol	C05892
C05893[c]	GlcNAc-(1->4)-MurNAc(oyl-L-Ala-gamma-D-Glu-L-Lys-D-Ala-D-Ala)-diphosphoundecaprenol	C94H156N8O26P2	C94H153N8O26P2	-3	cytosol	C05893
C05897[c]	Undecaprenyl-diphospho-N-acetylmuramoyl-L-alanyl-D-glutamyl-meso-2,6-diaminopimeloyl-D-alanyl-D-alanine	C87H143N7O23P2	C87H139N7O23P2	-4	cytosol	C05897
C05898[c]	Undecaprenyl-diphospho-N-acetylmuramoyl-(N-acetylglucosamine)-L-alanyl-D-glutamyl-meso-2,6-diaminopimeloyl-D-alanyl-D-alanine	C95H156N8O28P2	C95H152N8O28P2	-4	cytosol	C05898
C05921[c]	Biotinyl-5'-AMP	C20H28N7O9PS	C20H27N7O9PS	-1	cytosol	C05921
C05922[c]	Formamidopyrimidine nucleoside triphosphate	C10H18N5O15P3	C10H14N5O15P3	-4	cytosol	C05922
C05923[c]	2,5-Diaminopyrimidine nucleoside triphosphate	C9H18N5O14P3	C9H14N5O14P3	-4	cytosol	C05923
C05924[c]	Molybdopterin	C10H14N5O6PS2	C10H11N5O6PS2	-3	cytosol	C05924
C05928[c]	(6R)-10-Formyltetrahydropteroyldiglutamate	C25H30N8O10	C25H27N8O10	-3	cytosol	C05928
C05946[c]	D-4-Hydroxy-2-oxoglutarate	C5H6O6	C5H4O6	-2	cytosol	C05946
C05947[c]	L-erythro-4-Hydroxyglutamate	C5H9NO5	C5H8NO5	-1	cytosol	C05947
C05966[c]	(5Z,8Z,11Z,13E)-(15S)-15-Hydroperoxyicosa-5,8,11,13-tetraenoate	C20H32O4	C20H31O4	-1	cytosol	C05966
C05980[c]	Diphosphatidylglycerol;	C13H18O17P2R4	C13H16O17P2R4	-2	cytosol	C05980
C05983[c]	Propionyl-adenosine monophosphate	C13H18N5O8P	C13H17N5O8P	-1	cytosol	C05983
C05993[c]	Acetyladenylate	C12H16N5O8P	C12H15N5O8P	-1	cytosol	C05993
C06006[c]	(S)-2-Hydroxy-2-ethyl-3-oxobutanoate	C6H10O4	C6H9O4	-1	cytosol	C06006
C06007[c]	(2R,3R)-2,3-Dihydroxy-3-methylpentanoate	C6H12O4	C6H11O4	-1	cytosol	C06007
C06010[c]	(2S)-2-Hydroxy-2-methyl-3-oxobutanoate	C5H8O4	C5H7O4	-1	cytosol	C06010
C06019[c]	D-arabino-6-Phospho-hex-3-ulose	C6H13O9P	C6H11O9P	-2	cytosol	C06019
C06022[c]	UDP-3-O-[(3R)-3-hydroxymyristoyl]-alpha-D-glucosamine	C29H51N3O18P2	C29H50N3O18P2	-1	cytosol	C06022
C06024[c]	3-Deoxy-D-manno-octulosonyl-lipid IV(A);	C76H142N2O30P2	C76H137N2O30P2	-5	cytosol	C06024
C06025[c]	KDO2-lipid IV(A)	C84H154N2O37P2	C84H148N2O37P2	-6	cytosol	C06025
C06027[c]	(2R,3S)-2-Methyl-3-carboxy-3-hydroxypropanoyl-CoA	C26H42N7O20P3S	C26H37N7O20P3S	-5	cytosol	C06027
C06032[c]	D-erythro-3-Methylmalate;	C5H8O5	C5H6O5	-2	cytosol	C06032
C06054[c]	(3R)-3-Hydroxy-2-oxo-4-phosphonooxybutanoate	C4H7O8P	C4H4O8P	-3	cytosol	C06054
C06055[c]	4-(Phosphonooxy)-L-threonine	C4H10NO7P	C4H8NO7P	-2	cytosol	C06055
C06056[c]	Hydroxythreonine	C4H9NO4	C4H9NO4	0	cytosol	C06056
C06114[c]	gamma-Glutamyl-3-aminopropiononitrile	C8H13N3O3	C8H13N3O3	0	cytosol	C06114
C06148[c]	2,5-Diamino-6-(5'-triphosphoryl-3',4'-trihydroxy-2'-oxopentyl)-amino-4-oxopyrimidine	C9H18N5O14P3	C9H14N5O14P3	-4	cytosol	C06148
C06156[c]	D-Glucosamine 1-phosphate	C6H14NO8P	C6H13NO8P	-1	cytosol	C06156
C06157[c]	[Dihydrolipoyllysine-residuesuccinyltransferase]	C13H22NO4S2R	C13H21NO4S2R	-1	cytosol	C06157
C06196[c]	2'-Deoxyinosine 5'-phosphate;	C10H13N4O7P	C10H11N4O7P	-2	cytosol	C06196
C06206[c]	Benzoyl phosphate	C7H7O5P	C7H5O5P	-2	cytosol	C06206
C06249[c]	Apo-[carboxylase]	C7H13N3O2R2	C7H14N3O2R2	1	cytosol	C06249
C06250[c]	Biotin-carboxyl-carrier protein	C17H27N5O4SR2	C17H27N5O4SR2	0	cytosol	C06250
C06309[c]	Hopan-22-ol	C30H52O	C30H52O	0	cytosol	C06309
C06310[c]	Hop-22(29)-ene	C30H50	C30H50	0	cytosol	C06310
C06319[c]	Precorrin 6B	C44H56N4O16	C44H48N4O16	-8	cytosol	C06319
C06397[c]	ADP-D-glycero-beta-D-manno-heptose	C17H27N5O16P2	C17H25N5O16P2	-2	cytosol	C06397
C06399[c]	Hydrogenobyrinate	C45H60N4O14	C45H54N4O14	-7	cytosol	C06399
C06406[c]	Precorrin 3B	C43H50N4O17	C43H50N4O17	-6	cytosol	C06406
C06407[c]	Precorrin4	C44H52N4O17	C44H46N4O17	-6	cytosol	C06407
C06408[c]	Precorrin8X	C45H60N4O14	C45H53N4O14	-7	cytosol	C06408
C06416[c]	Precorrin5	C45H54N4O17	C45H48N4O17	-6	cytosol	C06416
C06424[c]	Tetradecanoicacid	C14H28O2	C14H27O2	-1	cytosol	C06424
C06425[c]	Icosanoicacid	C20H40O2	C20H39O2	-1	cytosol	C06425
C06428[c]	(5Z,8Z,11Z,14Z,17Z)-Icosapentaenoicacid	C20H30O2	C20H29O2	-1	cytosol	C06428
C06503[c]	Hydrogenobyrinic acid a,c-diamide	C45H62N6O12	C45H60N6O12	-2	cytosol	C06503
C06504[c]	Cobyrinic acid a,c-diamide	C45H61CoN6O12	C45H57CoN6O12	-4	cytosol	C06504
C06505[c]	Cob(I)yrinic acid a,c-diamide	C45H61CoN6O12	C45H61CoN6O12	-5	cytosol	C06505
C06506[c]	Adenosylcobyrinic acid a,c-diamide	C55H73CoN11O15 (1)	C55H73CoN11O15	-4	cytosol	C06506
C06507[c]	Adenosylcobyrinatehexaamide	C55H77CoN15O11	C55H77CoN15O11	1	cytosol	C06507
C06508[c]	Adenosylcobinamide	C58H84CoN16O11	C58H84CoN16O11	0	cytosol	C06508
C06509[c]	Adenosylcobinamide phosphate	C58H85CoN16O14P (1)	C58H85CoN16O14P	-1	cytosol	C06509
C06510[c]	Adenosylcobinamide-GDP	C68H97CoN21O21P2 (1)	C68H97CoN21O21P2 (-1)	-1	cytosol	C06510
C06547[c]	Ethylene	C2H4	C2H4	0	cytosol	C06547
C06611[c]	trans-3-Chloroallyl alcohol	C3H5ClO	C3H5ClO	0	cytosol	C06611
C06612[c]	cis-3-Chloroallyl alcohol	C3H5ClO	C3H5ClO	0	cytosol	C06612
C06613[c]	trans-3-Chloro-2-propenal	C3H3ClO	C3H3ClO	0	cytosol	C06613
C06706[c]	Lipo-oligosaccharide				cytosol	C06706
C06753[c]	Glycol chlorohydrin	C2H5ClO	C2H5ClO	0	cytosol	C06753
C06754[c]	2-Chloroethanal	C2H3ClO	C2H3ClO	0	cytosol	C06754
C07086[c]	Benzeneacetic acid	C8H8O2	C8H8O2	0	cytosol	C07086
C07335[c]	2-Amino-3-oxo-4-phosphonooxybutyrate;	C4H8NO7P	C4H6NO7P	-2	cytosol	C07335
C07836[c]	D-glycero-beta-D-manno-Heptose 7-phosphate	C7H15O10P	C7H13O10P	-2	cytosol	C07836
C07838[c]	D-glycero-beta-D-manno-Heptose 1-phosphate	C7H15O10P	C7H13O10P	-2	cytosol	C07838
C08276[c]	3-Methylthiopropionate	C4H8O2S	C4H7O2S	-1	cytosol	C08276
C08325[c]	Amygdalin	C20H27NO11	C20H27NO11	0	cytosol	C08325
C08334[c]	Lotaustralin	C11H19NO6	C11H19NO6	0	cytosol	C08334
C08362[c]	(9Z)-Hexadecenoicacid	C16H30O2	C16H29O2	-1	cytosol	C08362
C08821[c]	Isofucosterol	C29H48O	C29H48O	0	cytosol	C08821
C09332[c]	Tetrahydropteroyldiglutamate	C24H30N8O9	C24H27N8O9	-3	cytosol	C09332
C09814[c]	Cyanobenzene	C7H5N	C7H5N	0	cytosol	C09814
C11038[c]	2'-Deoxy-5-hydroxymethylcytidine-5'-diphosphate	C10H17N3O11P2	C10H14N3O11P2	-3	cytosol	C11038
C11039[c]	2'-Deoxy-5-hydroxymethylcytidine-5'-triphosphate	C10H18N3O14P3	C10H14N3O14P3	-4	cytosol	C11039
C11145[c]	Methanesulfonicacid	CH4SO3	CH4SO3	0	cytosol	C11145
C11355[c]	4-Amino-4-deoxychorismate;	C10H11NO5	C10H10NO5	-1	cytosol	C11355
C11434[c]	2-C-Methyl-D-erythritol 4-phosphate	C5H13O7P	C5H11O7P	-2	cytosol	C11434
C11435[c]	4-(Cytidine 5'-diphospho)-2-C-methyl-D-erythritol	C14H25N3O14P2	C14H23N3O14P2	-2	cytosol	C11435
C11436[c]	2-Phospho-4-(cytidine 5'-diphospho)-2-C-methyl-D-erythritol	C14H26N3O17P3	C14H22N3O17P3	-4	cytosol	C11436
C11437[c]	1-Deoxy-D-xylulose 5-phosphate	C5H11O7P	C5H9O7P	-2	cytosol	C11437
C11453[c]	2-C-Methyl-D-erythritol 2,4-cyclodiphosphate;	C5H12O9P2	C5H10O9P2	-2	cytosol	C11453
C11455[c]	4,4-Dimethyl-5alpha-cholesta-8,14,24-trien-3beta-ol	C29H46O	C29H46O	0	cytosol	C11455
C11472[c]	D-glycero-beta-D-manno-Heptose 1,7-bisphosphate	C7H16O13P2	C7H12O13P2	-4	cytosol	C11472
C11508[c]	4alpha-Methyl-5alpha-ergosta-8,14,24(28)-trien-3beta-ol	C29H46O	C29H46O	0	cytosol	C11508
C11537[c]	(2R)-3-Sulfolactate	C3H6O6S	C3H4O6S	-2	cytosol	C11537
C11538[c]	Cobalt-sirohydrochlorin;	C42H44CoN4O16	C42H36CoN4O16	-8	cytosol	C11538
C11539[c]	Cobalt-precorrin 3	C43H48CoN4O16	C43H40CoN4O16	-8	cytosol	C11539
C11540[c]	Cobalt-precorrin 4	C44H50CoN4O16	C44H43CoN4O16	-7	cytosol	C11540
C11542[c]	Cobalt-precorrin6	C44H53CoN4O16	C44H45CoN4O16	-7	cytosol	C11542
C11545[c]	Cobalt-precorrin-8	C45H59CoN4O14	C45H52CoN4O14	-7	cytosol	C11545
C11588[c]	cis-3-(2-Carboxy-ethyl)-3,5-cyclo-hexadiene-1,2-diol;	C9H12O4	C9H11O4	-1	cytosol	C11588
C11638[c]	1-Amino-3-(phosphohydroxy)propan-2-one	C3H8NO5P	C3H7NO5P	-1	cytosol	C11638
C11811[c]	(E)-4-Hydroxy-3-methylbut-2-en-1-yl diphosphate	C5H12O8P2	C5H9O8P2	-3	cytosol	C11811
C11907[c]	4,6-Dideoxy-4-oxo-dTDP-D-glucose	C16H24N2O15P2	C16H22N2O15P2	-2	cytosol	C11907
C12622[c]	cis-3-(3-Carboxyethenyl)-3,5-cyclohexadiene-1,2-diol;	C9H10O4	C9H9O4	-1	cytosol	C12622
C13309[c]	Demethylphylloquinone	C30H44O2	C30H44O2	0	cytosol	C13309
C14089[c]	1-Naphthalenemethanol	C11H10O	C11H10O	0	cytosol	C14089
C14090[c]	1-Formylnaphthalene	C11H8O	C11H8O	0	cytosol	C14090
C14099[c]	2-Naphthalenecarboxaldehyde	C11H8O	C11H8O	0	cytosol	C14099
C14463[c]	(R)-3-Hydroxy-3-methyl-2-oxopentanoate	C6H10O4	C6H9O4	-1	cytosol	C14463
C14818[c]	Ferrous ion;	Fe	Fe	2	cytosol	C14818
C14819[c]	Ferric ion;	Fe	Fe	3	cytosol	C14819
C15532[c]	N-Acetyl-L-citrulline	C8H15N3O4	C8H14N3O4	-1	cytosol	C15532
C15556[c]	2-Hydroxy-3-oxobutyl phosphate	C4H9O6P	C4H7O6P	-2	cytosol	C15556
C15602[c]	Quinone	C6H4O2	C6H4O2	0	cytosol	C15602
C15603[c]	Reduced quinone	C6H6O2	C6H6O2	0	cytosol	C15603
C15606[c]	1,2-Dihydroxy-5-(methylthio)pent-1-en-3-one	C6H10O3S	C6H10O3S	0	cytosol	C15606
C15650[c]	2,3-Diketo-5-methylthiopentyl-1-phosphate;	C6H11O6PS	C6H9O6PS	-2	cytosol	C15650
C15667[c]	5-Carboxyamino-1-(5-phospho-D-ribosyl)imidazole	C9H14N3O9P	C9H11N3O9P	-3	cytosol	C15667
C15670[c]	HemeA	C49H56FeN4O6	C49H54FeN4O6	-2	cytosol	C15670
C15672[c]	HemeO	C49H58FeN4O5	C49H56FeN4O5	-2	cytosol	C15672
C15781[c]	24-Methylenecholesterol	C28H46O	C28H46O	0	cytosol	C15781
C15809[c]	2-Iminoacetate	C2H3NO2	C2H3NO2	0	cytosol	C15809
C15810[c]	Sulfur-carrierprotein	C4H7N2O3R	C4H7N2O3R	0	cytosol	C15810
C15811[c]	[Enzyme]-cysteine	C4H6N2O2SR2	C4H6N2O2SR2		cytosol	C15811
C15812[c]	[Enzyme]-S-sulfanylcysteine	C4H6N2O2S2R2	C4H6N2O2S2R2	0	cytosol	C15812
C15814[c]	Thiocarboxy-[sulfur-carrierprotein]	C4H7N2O2SR	C4H7N2O2SR	0	cytosol	C15814
C15915[c]	4,4-Dimethyl-5alpha-cholesta-8-en-3beta-ol	C29H50O	C29H50O	0	cytosol	C15915
C15973[c]	Dihydrolipoamide-E	C8H16NOS2R	C8H16NOS2R	0	cytosol	C15973
C15996[c]	7-Cyano-7-deazaguanine	C7H5N5O	C7H5N5O	0	cytosol	C15996
C16219[c]	3-Oxostearoyl-[acp]	C18H33O2SR	C18H33O2SR	0	cytosol	C16219
C16220[c]	(R)-3-Hydroxyoctadecanoyl-[acp]	C18H35O2SR	C18H35O2SR	0	cytosol	C16220
C16221[c]	(2E)-Octadecenoyl-[acp]	C18H33OSR	C18H33OSR	0	cytosol	C16221
C16236[c]	Protein N6-(octanoyl)lysine	C8H16NOR	C8H16NOR	0	cytosol	C16236
C16237[c]	Protein N6-(lipoyl)lysine;	C8H14NOS2R	C8H14NOS2R	0	cytosol	C16237
C16239[c]	Lipoyl-ACP	C8H13OS3R	C8H13OS3R	0	cytosol	C16239
C16240[c]	Apoprotein	NH2R	NH3R	1	cytosol	C16240
C16242[c]	Cobalt-precorrin 5A	C45H52CoN4O16	C45H45CoN4O16	-7	cytosol	C16242
C16243[c]	Cobalt-precorrin5B	C43H50CoN4O16	C43H42CoN4O16	-8	cytosol	C16243
C16254[c]	[Dihydrolipoyllysine-residuesuccinyltransferase]	C12H20NO4S2R	C12H19NO4S2R	-1	cytosol	C16254
C16348[c]	cis-3-Chloro-2-propenal	C3H3ClO	C3H3ClO	0	cytosol	C16348
C16391[c]	Trinitrotoluene;	C7H5N3O6	C7H5N3O6	0	cytosol	C16391
C16392[c]	4-Hydroxylamino-2,6-dinitrotoluene	C7H7N3O5	C7H7N3O5	0	cytosol	C16392
C16393[c]	2-Hydroxylamino-4,6-dinitrotoluene	C7H7N3O5	C7H7N3O5	0	cytosol	C16393
C16396[c]	2,4-Diamino-6-nitrotoluene	C7H9N3O2	C7H9N3O2	0	cytosol	C16396
C16399[c]	2,4-Diamino-6-hydroxylaminotoluene	C7H11N3O	C7H11N3O	0	cytosol	C16399
C16565[c]	Aminopropylcadaverine	C8H21N3	C8H24N3	3	cytosol	C16565
C16675[c]	7-Aminomethyl-7-deazaguanine	C7H9N5O	C7H10N5O	1	cytosol	C16675
C17023[c]	Sulfurdonor	XS	XS	0	cytosol	C17023
C17401[c]	Cobalt-factor III	C43H46CoN4O16	C43H38CoN4O16	-8	cytosol	C17401
C17551[c]	3-Polyprenylcatechol	C11H14O2(C5H8)n	C11H14O2(C5H8)n	0	cytosol	C17551
C17552[c]	2-Polyprenyl-6-methoxyphenol	C12H16O2(C5H8)n	C12H16O2(C5H8)n	0	cytosol	C17552
C17556[c]	ditrans,octacis-Undecaprenyl phosphate	C55H91O4P	C55H91O4P	-2	cytosol	C17556
C17558[c]	di-trans,poly-cis-Undecaprenol	C55H90O	C55H90O	0	cytosol	C17558
C17560[c]	2-Polyprenyl-6-methoxy-1,4-benzoquinone	C12H14O3(C5H8)n	C12H14O3(C5H8)n	0	cytosol	C17560
C17561[c]	2-Polyprenyl-3-methyl-6-methoxy-1,4-benzoquinone	C13H16O3(C5H8)n	C13H16O3(C5H8)n	0	cytosol	C17561
C17562[c]	2-Polyprenyl-3-methyl-5-hydroxy-6-methoxy-1,4-benzoquinone	C13H16O4(C5H8)n	C13H16O4(C5H8)n	0	cytosol	C17562
C17569[c]	Ubiquinone-8	C49H74O4	C49H74O4	0	cytosol	C17569
C18096[c]	D-Allulose6-phosphate	C6H13O9P	C6H11O9P	-2	cytosol	C18096
C18172[c]	Carboxyspermidine	C8H19N3O2	C8H21N3O2	2	cytosol	C18172
C18174[c]	Carboxynorspermidine	C7H17N3O2	C7H19N3O2	2	cytosol	C18174
C18233[c]	FerricytochromecL				cytosol	C18233
C18234[c]	FerrocytochromecL			0	cytosol	C18234
C18239[c]	Cyclic pyranopterin phosphate;	C10H14N5O8P	C10H13N5O8P	-1	cytosol	C18239
C18796[c]	2-Hydroxy-2-methylbutanenitrile	C5H9NO	C5H9NO	0	cytosol	C18796
C18902[c]	Methylseleninate	CH4O2Se	CH4O2Se	0	cytosol	C18902
C19673[c]	Malonyl-[acp] methyl ester;	C4H5O3SR	C4H5O3SR	0	cytosol	C19673
C19787[c]	S-Methyl-5'-thioinosine	C11H14N4O4S	C11H14N4O4S	0	cytosol	C19787
C19845[c]	7-Hydroxy-7-oxoheptanoyl-[acyl-carrier protein]	C7H11O3SR	C7H10O3SR	-1	cytosol	C19845
C19846[c]	Pimelyl-[acp] methyl ester	C8H13O3SR	C8H13O3SR	0	cytosol	C19846
C19878[c]	D-glycero-alpha-D-manno-Heptose 7-phosphate	C7H15O10P	C7H13O10P	-2	cytosol	C19878
C19879[c]	D-glycero-alpha-D-manno-Heptose 1,7-bisphosphate	C7H16O13P2	C7H12O13P2	-4	cytosol	C19879
C19880[c]	D-glycero-alpha-D-manno-Heptose 1-phosphate	C7H15O10P	C7H13O10P	-2	cytosol	C19880
C20239[c]	6-Carboxytetrahydropterin	C7H9N5O3	C7H8N5O3	-1	cytosol	C20239
C20246[c]	2-[(2R,5Z)-2-Carboxy-4-methylthiazol-5(2H)-ylidene]ethyl phosphate	C7H10NO6PS	C7H7NO6PS	-3	cytosol	C20246
C20247[c]	2-(2-Carboxy-4-methylthiazol-5-yl)ethyl phosphate;	C7H10NO6PS	C7H7NO6PS	-3	cytosol	C20247
C20248[c]	7-Carboxy-7-deazaguanine	C7H6N4O3	C7H5N4O3	-1	cytosol	C20248
C20258[c]	(2S,4S)-4-Hydroxy-2,3,4,5-tetrahydrodipicolinate;	C7H9NO5	C7H7NO5	-2	cytosol	C20258
C20372[c]	3-Ketoglutaryl-[acyl-carrier protein] methyl ester	C6H7O4SR	C6H7O4SR	0	cytosol	C20372
C20373[c]	3-Hydroxyglutaryl-[acp] methyl ester;	C6H9O4SR	C6H9O4SR	0	cytosol	C20373
C20374[c]	Enoylglutaryl-[acyl-carrier protein] methyl ester	C6H7O3SR	C6H7O3SR	0	cytosol	C20374
C20375[c]	Glutaryl-[acyl-carrier protein] methyl ester	C6H9O3SR	C6H9O3SR	0	cytosol	C20375
C20376[c]	3-Ketopimeloyl-[acyl-carrier protein] methyl ester	C8H11O4SR	C8H11O4SR	0	cytosol	C20376
C20377[c]	3-Hydroxypimeloyl-[acyl-carrier protein] methyl ester	C8H13O4SR	C8H13O4SR	0	cytosol	C20377
C20378[c]	Enoylpimeloyl-[acyl-carrier protein] methyl ester	C8H11O3SR	C8H11O3SR	0	cytosol	C20378
C20994[c]	S-(Hercyn-2-yl)-L-cysteine S-oxide	C12H21N4O5S	C12H20N4O5S	0	cytosol	C20994
C20995[c]	gamma-L-Glutamyl-S-(hercyn-2-yl)-L-cysteine S-oxide	C17H28N5O8S	C17H26N5O8S	-2	cytosol	C20995
C21015[c]	gamma-L-Glutamyl-L-2-aminobutyrate	C9H16N2O5	C9H15N2O5	-1	cytosol	C21015
C21016[c]	Ophthalmate	C11H19N3O6	C11H18N3O6	-1	cytosol	C21016
C21027[c]	N-Acetylmuramicacidalpha-1-phosphate	C11H20NO11P	C11H17NO11P	-3	cytosol	C21027
C21106[c]	24-epi-Campesterol	C28H48O	C28H48O	0	cytosol	C21106
C21310[c]	(8S)-3',8-Cyclo-7,8-dihydroguanosine5'-triphosphate	C10H16N5O14P3	C10H12N5O14P3	-4	cytosol	C21310
CCL160161[c]	cardiolipin with palmitic acid and palmitoleic acid	C77H142O21P2	C77H142O21P2	0	cytosol	CCL160161
CCL161140[c]	cardiolipin with myristic and palmitoleic acid	C73H134O21P2	C73H134O21P2	0	cytosol	CCL161140
CCL161161[c]	cardiolipin with palmitoleic acid	C77H138O21P2	C77H138O21P2	0	cytosol	CCL161161
CPC160161[c]	phosphatidyl choline with palmitic acid and palmitoleic acid	C42H80N1O10P1	C42H80N1O10P1	0	cytosol	CPC160161
CPC161140[c]	phosphatidyl choline with myristic and palmitoleic acid	C40H76N1O10P1	C40H76N1O10P1	0	cytosol	CPC161140
CPC161161[c]	phosphatidyl choline with palmitoleic acid	C42H78N1O10P1	C42H78N1O10P1	0	cytosol	CPC161161
CPE160161[c]	phosphatidyl ethanol amine with palmitic acid and palmitoleic acid	C37H72N1O10P1	C37H72N1O10P1	0	cytosol	CPE160161
CPE161140[c]	phosphatidyl ethanol amine with myristic and palmitoleic acid	C35H68N1O10P1	C35H68N1O10P1	0	cytosol	CPE161140
CPE161161[c]	phosphatidyl ethanol amine with palmitoleic acid	C37H70N1O10P1	C37H70N1O10P1	0	cytosol	CPE161161
CPG160161[c]	phosphatidyl glycerol with palmitic acid and palmitoleic acid	C38H73O12P1	C38H73O12P1	0	cytosol	CPG160161
CPG161140[c]	phosphatidyl glycerol with myristic and palmitoleic acid	C36H69O12P1	C36H69O12P1	0	cytosol	CPG161140
CPG161161[c]	phosphatidyl glycerol with palmitoleic acid	C38H71O12P1	C38H71O12P1	0	cytosol	CPG161161

## Sheet: reactions
Abbreviation	Description	Reaction	GPR	Genes	Proteins	Subsystem	Reversible	Lower bound	Upper bound	Objective	Confidence Score	EC Number	rxnNotes	References
Starch_synthesis	Starch Synthesis Reaction	C00498[c] -> C00008[c] + C00369[c]				Starch and sucrose metabolism	0	0	1000	0
Starch_degredation	Starch Degredation Reaction	C00369[c] + C00009[c] -> C00103[c]				Starch and sucrose metabolism	0	0	1000	0
Rspont2	Spontanous Reaction	C01165[c] <=> C00001[c] + C00080[c] + C03912[c]				Arginine and proline metabolism	1	-1000	1000	0
RPG161161	Phosphatidylglycerol Synthesis Reaction	C00001[c] + C00093[c] + C00111[c] + C00063[c] + 2 C08362[c] + C00005[c] <=> C00009[c] + C00013[c] + C00006[c] + CPG161161[c] + C00055[c]				Fatty acid biosynthesis	0	0	1000	0
RPG161140	Phosphatidylglycerol Synthesis Reaction	C00001[c] + C00093[c] + C00111[c] + C00063[c] + C08362[c] + C00005[c] + C06424[c] <=> C00009[c] + C00013[c] + C00006[c] + C00055[c] + CPG161140[c]				Fatty acid biosynthesis	0	0	1000	0
RPG160161	Phosphatidylglycerol Synthesis Reaction	C00001[c] + C00093[c] + C00111[c] + C00063[c] + C08362[c] + C00005[c] + C00249[c] <=> C00009[c] + C00013[c] + C00006[c] + C00055[c] + CPG160161[c]				Fatty acid biosynthesis	0	0	1000	0
RPE161161	Phosphatidylethanol Synthesis Reaction	C00111[c] + C00063[c] + 2 C08362[c] + C00005[c] + C00065[c] <=> C00013[c] + C00006[c] + C00055[c] + C00011[c] + CPE161161[c]				Fatty acid biosynthesis	0	0	1000	0
RPE161140	Phosphatidylethanol Synthesis Reaction	C00111[c] + C00063[c] + C08362[c] + C00005[c] + C06424[c] + C00065[c] <=> C00013[c] + C00006[c] + C00055[c] + C00011[c] + CPE161140[c]				Fatty acid biosynthesis	0	0	1000	0
RPE160161	Phosphatidylethanol Synthesis Reaction	C00111[c] + C00063[c] + C08362[c] + C00005[c] + C00249[c] + C00065[c] <=> C00013[c] + C00006[c] + C00055[c] + C00011[c] + CPE160161[c]				Fatty acid biosynthesis	0	0	1000	0
RPC161161	PhosphatidylCholine Synthesis Reaction	CPE161161[c] + 3 C00019[c] <=> 3 C00021[c] + CPC161161[c]				Fatty acid biosynthesis	0	0	1000	0
RPC161140	PhosphatidylCholine Synthesis Reaction	CPE161140[c] + 3 C00019[c] <=> 3 C00021[c] + CPC161140[c]				Fatty acid biosynthesis	0	0	1000	0
RPC160161	PhosphatidylCholine Synthesis Reaction	CPE160161[c] + 3 C00019[c] <=> 3 C00021[c] + CPC160161[c]				Fatty acid biosynthesis	0	0	1000	0
RCL161161	Cardiolipin Syntheis Reaction	2 CPG161161[c] <=> C00116[c] + CCL161161[c]				Fatty acid biosynthesis	0	0	1000	0
RCL161140	Cardiolipin Syntheis Reaction	2 CPG161140[c] <=> C00116[c] + CCL161140[c]				Fatty acid biosynthesis	0	0	1000	0
RCL160161	Cardiolipin Syntheis Reaction	2 CPG160161[c] <=> C00116[c] + CCL160161[c]				Fatty acid biosynthesis	0	0	1000	0
RC08362	Fatty Acid Synthesis Reation	C00080[c] + C00249[c] + C00004[c] + C00007[c] -> 2 C00001[c] + C08362[c] + C00003[c]				Fatty acid biosynthesis	0	0	1000	0
R11096		C00080[c] + C00005[c] + C15781[c] -> C00006[c] + C21106[c]	MCA1404	MCA1404	1.3.1.-	Steroid biosynthesis	0	0	1000	0		1.3.1.-
R11025	UTP:N-acetyl-alpha-D-muramate-1-phosphate uridylyltransferase	C00075[c] + C21027[c] -> C00013[c] + C01050[c]	MCA0599	MCA0599	2.7.7.-	Amino sugar and nucleotide sugar metabolism	0	0	1000	0		2.7.7.-
R11024	ATP:N-acetylmuramate 1-phosphotransferase	C00002[c] + C02713[c] -> C00008[c] + C21027[c]	MCA0600	MCA0600	2.7.1.-	Amino sugar and nucleotide sugar metabolism	0	0	1000	0		2.7.1.-
R10994	gamma-L-glutamyl-L-2-aminobutyrate:glycine ligase (ADP-forming)	C00002[c] + C21015[c] + C00037[c] -> C00008[c] + C00009[c] + C21016[c]	MCA2338	MCA2338	6.3.2.3	Cysteine and methionine metabolism	0	0	1000	0		6.3.2.3
R10993	L-glutamate:2-aminobutanoate gamma-ligase (ADP-forming)	C00002[c] + C00025[c] + C02356[c] -> C00008[c] + C00009[c] + C21015[c]	MCA2467	MCA2467	6.3.2.2	Cysteine and methionine metabolism	0	0	1000	0		6.3.2.2
R10991	2-aminobutanoate:2-oxoglutarate aminotransferase	C02356[c] + C00026[c] <=> C00025[c] + C00109[c]	MCA2344	MCA2344	2.6.1.42	Cysteine and methionine metabolism	1	-1000	1000	0		2.6.1.42
R10907	beta-D-glucose-6-phosphate:NAD+ 1-oxidoreductase	C00003[c] + C01172[c] <=> C00080[c] + C00004[c] + C01236[c]	MCA0025 or MCA2971	MCA0025,MCA2971		Pentose phosphate pathway	1	-1000	1000	0
R10866	pyruvate:flavodoxin 2-oxidoreductase (CoA-acetylating)	C00010[c] + C00022[c] + C02869[c] <=> C00011[c] + C00024[c] + C02745[c]	MCA0769	MCA0769	1.2.7.-	Pyruvate metabolism	1	-1000	1000	0		1.2.7.-
R10859	(E)-4-hydroxy-3-methylbut-2-en-1-yl-diphosphate:oxidized flavodoxin oxidoreductase	C02745[c] + C11453[c] -> C00001[c] + C02869[c] + C11811[c]	MCA2483	MCA2483	1.17.7.3	Terpenoid backbone biosynthesis	0	0	1000	0		1.17.7.3
R10712	2-methyl-4-amino-5-hydroxymethylpyrimidine-diphosphate:2-(2-carboxy-4-methylthiazol-5-yl)ethyl phosphate 2-methyl-4-aminopyrimidine-5-methenyltransferase	C20247[c] + C04752[c] -> C00013[c] + C00011[c] + C01081[c]	MCA2999	MCA2999	2.5.1.3	Thiamine metabolism	0	0	1000	0		2.5.1.3
R10707	acetyl-CoA:malonyl-[acyl-carrier protein] C-acetyltransferase (decarboxylating)	C00024[c] + C01209[c] -> C00011[c] + C00010[c] + C05744[c]	MCA2003	MCA2003	2.3.1.180	Fatty acid biosynthesis	0	0	1000	0		2.3.1.180
R10221	6-phospho-D-gluconate:NAD+ 2-oxidoreductase (decarboxylating)	C00003[c] + C00345[c] -> C00080[c] + C00011[c] + C00004[c] + C00199[c]	MCA1950	MCA1950		Pentose phosphate pathway	0	0	1000	0
R10164	hydroxylamine:ferricytochrome-c oxidoreductase	C00001[c] + 4 C00125[c] + C00192[c] <=> 5 C00080[c] + 4 C00126[c] + C00088[c]	MCA0956	MCA0956	1.7.2.6	Nitrogen metabolism	1	-1000	1000	0		1.7.2.6
R10151		5 C00001[c] + 8 C00125[c] + C00320[c] -> 10 C00080[c] + 8 C00126[c] + 2 C00059[c]	MCA0297 or MCA1504 or MCA1987 or MCA1989 or MCA2405	MCA0297,MCA1504,MCA1987,MCA1989,MCA2405		Sulfur metabolism	0	0	1000	0
R10147	L-aspartate-4-semialdehyde hydro-lyase [adding pyruvate and cyclizing; (2S,4S)-4-hydroxy-2,3,4,5-tetrahydrodipicolinate-forming]	C00022[c] + C00441[c] -> C00001[c] + C20258[c]	MCA0671	MCA0671	4.3.3.7	Monobactam biosynthesis	0	0	1000	0		4.3.3.7
R10124	pimeloyl-[acyl-carrier protein]:L-alanine C-pimeloyltransferase (decarboxylating)	C19845[c] + C00041[c] -> C00011[c] + C00229[c] + C01092[c]	MCA1125	MCA1125	2.3.1.47	Biotin metabolism	0	0	1000	0		2.3.1.47
R10122	pimelyl-[acyl-carrier protein]-methyl-ester:NADP+ oxidoreductase	C00080[c] + C00005[c] + C20378[c] -> C00006[c] + C19846[c]	MCA1263	MCA1263	1.3.1.10	Biotin metabolism	0	0	1000	0		1.3.1.10
R10121	3-hydroxypimeloyl-[acp]-methyl-ester hydro-lyase	C20377[c] -> C00001[c] + C20378[c]	MCA2445	MCA2445	4.2.1.59	Biotin metabolism	0	0	1000	0		4.2.1.59
R10120	3-hydroxypimeloyl-[acp]-methyl-ester:NADP+ oxidoreductase	C00080[c] + C00005[c] + C20376[c] -> C00006[c] + C20377[c]	MCA0927 or MCA2001	MCA0927,MCA2001	1.1.1.100	Biotin metabolism	0	0	1000	0		1.1.1.100
R10119	glutaryl-[acp]-methyl-ester:malonyl-[acyl-carrier protein] C-acyltransferase (decarboxylating)	C01209[c] + C20375[c] -> C00011[c] + C00229[c] + C20376[c]	MCA0924 or MCA2879 or MCA1999	MCA0924,MCA2879,MCA1999	2.3.1.41, 2.3.1.179	Biotin metabolism	0	0	1000	0		2.3.1.41, 2.3.1.179
R10118	glutaryl-[acp]-methyl-ester:NADP+ oxidoreductase	C00080[c] + C00005[c] + C20374[c] -> C00006[c] + C20375[c]	MCA1263	MCA1263	1.3.1.10	Biotin metabolism	0	0	1000	0		1.3.1.10
R10117	3-hydroxyglutaryl-[acp]-methyl-ester hydro-lyase	C20373[c] -> C00001[c] + C20374[c]	MCA2445	MCA2445	4.2.1.59	Biotin metabolism	0	0	1000	0		4.2.1.59
R10116	3-hydroxyglutaryl-[acp]-methyl-ester:NADP+ oxidoreductase	C00080[c] + C00005[c] + C20372[c] -> C00006[c] + C20373[c]	MCA0927 or MCA2001	MCA0927,MCA2001	1.1.1.100	Biotin metabolism	0	0	1000	0		1.1.1.100
R10115	malonyl-[acyl-carrier protein]-methyl-ester:malonyl-[acyl-carrier protein] C-acyltransferase	C01209[c] + C19673[c] -> C00011[c] + C00229[c] + C20372[c]	MCA0924 or MCA2879 or MCA1999	MCA0924,MCA2879,MCA1999	2.3.1.41, 2.3.1.179	Biotin metabolism	0	0	1000	0		2.3.1.41, 2.3.1.179
R10092	carbonate hydro-lyase (carbon-dioxide-forming)	C00001[c] + C00011[c] -> C00080[c] + C00288[c]	MCA0910 or MCA1080 or MCA1442 or MCA1665	MCA0910,MCA1080,MCA1442,MCA1665	4.2.1.1	Nitrogen metabolism	0	0	1000	0		4.2.1.1
R10040	beta-D-glucoside glucohydrolase	C00001[c] + C01594[c] -> C00221[c] + C02659[c]	MCA1578	MCA1578	3.2.1.21	Cyanoamino acid metabolism	0	0	1000	0		3.2.1.21
R10039	beta-D-glucoside glucohydrolase	C00001[c] + C08334[c] -> C00221[c] + C18796[c]	MCA1578	MCA1578	3.2.1.21	Cyanoamino acid metabolism	0	0	1000	0		3.2.1.21
R10035	beta-D-glucoside glucohydrolase	C00001[c] + C05143[c] -> C00221[c] + C03742[c]	MCA1578	MCA1578	3.2.1.21	Cyanoamino acid metabolism	0	0	1000	0		3.2.1.21
R10002	6-carboxy-5,6,7,8-tetrahydropterin ammonia-lyase	C20239[c] -> C00014[c] + C20248[c]	MCA1232	MCA1232	4.3.99.3	Folate biosynthesis	0	0	1000	0		4.3.99.3
R09978	7-carboxy-7-carbaguanine:ammonia ligase (ADP-forming)	C00002[c] + C00014[c] + C20248[c] -> C00008[c] + C00009[c] + C00001[c] + C15996[c]	MCA1233	MCA1233	6.3.4.20	Folate biosynthesis	0	0	1000	0		6.3.4.20
R09959	7,8-dihydroneopterin 3'-triphosphate acetaldehyde-lyase (6-carboxy-5,6,7,8-tetrahydropterin and triphosphate-forming)	C00001[c] + C04895[c] -> C20239[c] + C00084[c] + C00536[c]	MCA2527	MCA2527	4.1.2.50	Folate biosynthesis	0	0	1000	0		4.1.2.50
R09780	D-arabino-hex-3-ulose-6-phosphate isomerase	C06019[c] <=> C05345[c]	MCA2738 or MCA3044 or MCA3050	MCA2738,MCA3044,MCA3050	5.3.1.27	Pentose phosphate pathway	1	-1000	1000	0		5.3.1.27
R09771	D-glycero-alpha-D-manno-heptose 1,7-bisphosphate 7-phosphohydrolase	C00001[c] + C19879[c] -> C00009[c] + C19880[c]	MCA2051	MCA2051	3.1.3.83	Lipopolysaccharide biosynthesis	0	0	1000	0		3.1.3.83
R09769	D-glycero-alpha-D-manno-heptose 7-phosphate aldose-ketose-isomerase	C05382[c] -> C19878[c]	MCA0183	MCA0183	5.3.1.28	Lipopolysaccharide biosynthesis	0	0	1000	0		5.3.1.28
R09725	pimeloyl-[acyl-carrier protein]-methyl-ester hydrolase	C00001[c] + C19846[c] -> C19845[c] + C00132[c]	MCA1127	MCA1127	3.1.1.85	Biotin metabolism	0	0	1000	0		3.1.1.85
R09668	S-methyl-5'-thioinosine:phosphate S-methyl-5-thio-alpha-D-ribosyl-transferase	C00009[c] + C19787[c] -> C04188[c] + C00262[c]	MCA1986	MCA1986	2.4.2.44	Cysteine and methionine metabolism	0	0	1000	0		2.4.2.44
R09660	S-methyl-5'-thioadenosine amidohydrolase	C00001[c] + C00170[c] -> C00014[c] + C19787[c]	MCA1273	MCA1273	3.5.4.31	Cysteine and methionine metabolism	0	0	1000	0		3.5.4.31
R09543	S-adenosyl-L-methionine:malonyl-[acyl-carrier protein] O-methyltransferase	C00019[c] + C01209[c] -> C00021[c] + C19673[c]	MCA1128	MCA1128	2.1.1.197	Biotin metabolism	0	0	1000	0		2.1.1.197
R09518	methane,quinol:oxygen oxidoreductase	C00007[p] + C00390[p] + C01438[p] -> C00001[c] + C00132[p] + C00399[p]	(MCA1796 or MCA2853) and (MCA1797 or MCA2854) and (MCA1798 or MCA2855 or MCA0295)	MCA1796,MCA2853,MCA1797,MCA2854,MCA1798,MCA2855,MCA0295	1.14.18.3	Methane metabolism	0	0	1000	0		1.14.18.3
R09394	GTP 3',8-cyclase [(8S)-3',8-cyclo-7,8-dihydroguanosine 5'-triphosphate-forming]	C00019[c] + C00004[c] + C00044[c] -> C00003[c] + C05198[c] + C21310[c] + C00073[c]	MCA1949	MCA1949	4.1.99.22	Folate biosynthesis	0	0	1000	0		4.1.99.22
R09380	acyl-ACP:sn-glycerol-3-phosphate 1-O-acyltransferase	C00093[c] + C00173[c] -> C00229[c] + C00681[c]	MCA2004 or MCA2989	MCA2004,MCA2989	2.3.1.15	Glycerolipid metabolism	0	0	1000	0		2.3.1.15
R09372	methaneselenol:NADP+ oxidoreductase	2 C00080[c] + 2 C00005[c] + C18902[c] -> 2 C00001[c] + 2 C00006[c] + C05703[c]	MCA1694	MCA1694	1.8.1.9	Selenocompound metabolism	0	0	1000	0		1.8.1.9
R09365	5-methyltetrahydropteroyltri-L-glutamate:L-selenohomocysteine Se-methyltransferase	C04489[c] + C05698[c] -> C05335[c] + C04144[c]	MCA1545 or MCA2260	MCA1545,MCA2260	2.1.1.13, 2.1.1.14	Selenocompound metabolism	0	0	1000	0		2.1.1.13, 2.1.1.14
R09248	(2E,6E)-farnesyl-diphosphate:isopentenyl-diphosphate farnesyltranstransferase (adding 5 isopentenyl units)	C00448[c] + 5 C00129[c] -> 5 C00013[c] + C04146[c]	MCA2996	MCA2996	2.5.1.90	Terpenoid backbone biosynthesis	0	0	1000	0		2.5.1.90
R09128	2-chloroethanol:cytochrome c oxidoreductase	C06753[c] + 2 C18233[c] -> 2 C00080[c] + C06754[c] + 2 C18234[c]	MCA0779 and MCA0782	MCA0779,MCA0782	1.1.2.7	Chloroalkane and chloroalkene degradation	0	0	1000	0		1.1.2.7
R09127	ethanol:cytochrome c oxidoreductase	2 C18233[c] + C00469[c] <=> 2 C00080[c] + C00084[c] + 2 C18234[c]	MCA0779 and MCA0782	MCA0779,MCA0782	1.1.2.7	Glycolysis / Gluconeogenesis	1	-1000	1000	0		1.1.2.7
R09107	N-acetyl-L-citrulline amidohydrolase	C00001[c] + C15532[c] -> C00033[c] + C00327[c]	MCA2083	MCA2083	3.5.1.16	Arginine biosynthesis	0	0	1000	0		3.5.1.16
R09099	5,10-methylenetetrahydromethanopterin:glycine hydroxymethyltransferase	C00065[c] + C01217[c] -> C00001[c] + C00037[c] + C04377[c]	MCA1660	MCA1660	2.1.2.1	Methane metabolism	0	0	1000	0		2.1.2.1
R09082	carboxynorspermidine carboxy-lyase (norspermidine-forming)	C18174[c] -> C00011[c] + C03375[c]	MCA2593	MCA2593	4.1.1.96	Arginine and proline metabolism	0	0	1000	0		4.1.1.96
R09081	carboxyspermidine carboxy-lyase (spermidine-forming)	C18172[c] -> C00011[c] + C00315[c]	MCA2593	MCA2593	4.1.1.96	Arginine and proline metabolism	0	0	1000	0		4.1.1.96
R09030	D-allose-6-phosphate aldose-ketose-isomerase	C02962[c] -> C18096[c]	MCA0043 or MCA0355	MCA0043,MCA0355	5.3.1.6	Fructose and mannose metabolism	0	0	1000	0		5.3.1.6
R08968	ATP:N-acetyl-D-glucosamine 1-phosphotransferase	C00002[c] + C00140[c] -> C00008[c] + C04501[c]	MCA0600	MCA0600	2.7.1.162, 2.7.1.-	Amino sugar and nucleotide sugar metabolism	0	0	1000	0		2.7.1.162, 2.7.1.-
R08781	S-adenosyl-L-methionine:3-hydroxy-2-methoxy-5-methyl-6-(all-trans-polyprenyl)-1,4-benzoquinone 3-O-methyltransferase	C00019[c] + C17562[c] -> C00021[c] + C00399[c]	MCA1164 or MCA1272	MCA1164,MCA1272	2.1.1.64	Ubiquinone and other terpenoid-quinone biosynthesis	0	0	1000	0		2.1.1.64
R08775		C00080[c] + C00005[c] + C00007[c] + C17561[c] -> C00001[c] + C00006[c] + C17562[c]	MCA1754	MCA1754	1.14.13.-	Ubiquinone and other terpenoid-quinone biosynthesis	0	0	1000	0		1.14.13.-
R08774		C00019[c] + C17560[c] -> C00021[c] + C17561[c]	MCA2017	MCA2017	2.1.1.201	Ubiquinone and other terpenoid-quinone biosynthesis	0	0	1000	0		2.1.1.201
R08773		C00007[c] + C17552[c] -> C00001[c] + C17560[c]	MCA2769	MCA2769	1.14.13.-	Ubiquinone and other terpenoid-quinone biosynthesis	0	0	1000	0		1.14.13.-
R08769	S-adenosyl-L-methionine:3-polyprenylcatechol 1-O-methyltransferase;	C00019[c] + C17551[c] -> C00021[c] + C17552[c]	MCA1164 or MCA1272	MCA1164,MCA1272	2.1.1.222	Ubiquinone and other terpenoid-quinone biosynthesis	0	0	1000	0		2.1.1.222
R08716	cobalt-precorrin 3 dehydrogenase	C17401[c] <=> C11539[c]				Porphyrin and chlorophyll metabolism	1	-1000	1000	0
R08689	(E)-4-hydroxy-3-methylbut-2-en-1-yl-diphosphate:oxidized ferredoxin oxidoreductase (hydrating)	C11453[c] + 2 C00138[c] -> C00001[c] + C11811[c] + 2 C00139[c]	MCA2483	MCA2483	1.17.7.1	Terpenoid backbone biosynthesis	0	0	1000	0		1.17.7.1
R08676		C00498[c] + C00095[c] -> C00008[c] + C00089[c]				Starch and sucrose metabolism	0	0	1000	0
R08648	pyruvate:2-oxobutanoate acetaldehydetransferase (decarboxylating)	C00109[c] + C00022[c] -> C00011[c] + C06006[c]	(MCA1837 or MCA2270) and MCA2271	MCA1837,MCA2270,MCA2271	2.2.1.6	Valine, leucine and isoleucine biosynthesis	0	0	1000	0		2.2.1.6
R08639	alpha-D-glucose 1,6-phosphomutase	C00103[c] <=> C00092[c]	MCA0607 or MCA2782	MCA0607,MCA2782	5.4.2.2	Starch and sucrose metabolism	1	-1000	1000	0		5.4.2.2
R08575	sedoheptulose-7-phosphate:D-glyceraldehyde-3-phosphate glyceronetransferase	C05382[c] + C00118[c] <=> C00085[c] + C00279[c]	MCA3045	MCA3045	2.2.1.2	Pentose phosphate pathway	1	-1000	1000	0		2.2.1.2
R08549	2-Oxoglutarate dehydrogenase complex	C00003[c] + C00010[c] + C00026[c] <=> C00080[c] + C00011[c] + C00004[c] + C00091[c]	MCA1952 and MCA1953 and MCA3002	MCA1952,MCA1953,MCA3002	1.2.4.2, 1.8.1.4, 2.3.1.61	Metabolic pathways	1	-1000	1000	0		1.2.4.2, 1.8.1.4, 2.3.1.61
R08359	S-adenosylmethioninamine:cadaverine 3-aminopropyltransferase	C01137[c] + C01672[c] -> C00170[c] + C16565[c]	MCA1034 or MCA2046	MCA1034,MCA2046	2.5.1.16	Glutathione metabolism	0	0	1000	0		2.5.1.16
R08210	dimethylallyl diphosphate:ferredoxin oxidoreductase	2 C00080[c] + C11811[c] + 2 C00138[c] -> C00001[c] + 2 C00139[c] + C00235[c]	MCA1815	MCA1815	1.17.7.4	Terpenoid backbone biosynthesis	0	0	1000	0		1.17.7.4
R08060		C00001[c] + C01001[c] -> C00058[c] + C00862[c]	(MCA2319 or MCA2859) and MCA2857 and MCA2860	MCA2319,MCA2859,MCA2857,MCA2860	1.2.99.5	Methane metabolism	0	0	1000	0		1.2.99.5
R08059		C00006[c] + C04377[c] -> C00005[c] + C04330[c]	MCA3018 or MCA3019	MCA3018,MCA3019	1.5.1.-	Methane metabolism	0	0	1000	0		1.5.1.-
R08058	5,6,7,8-tetrahydromethanopterin hydro-lyase (formaldehyde-adding, 5,10-methylenetetrahydromethanopterin-forming)	C00067[c] + C01217[c] -> C00001[c] + C04377[c]	MCA2866	MCA2866	4.2.1.147	Methane metabolism	0	0	1000	0		4.2.1.147
R08042		2 C00080[c] + 2 C00004[c] + C16391[c] -> C00001[c] + 2 C00003[c] + C16393[c]	MCA0639	MCA0639	1.-.-.-	Nitrotoluene degradation	0	0	1000	0		1.-.-.-
R08034		C16396[c] +2.0 C00282 -> C16399[c] + C00001	MCA0165 and MCA0166	MCA0165,MCA0166	1.2.7.4, 1.12.99.6	Nitrotoluene degradation	0	0	1000	0		1.2.7.4, 1.12.99.6
R07773	S-adenosyl-L-methionine:cobalt-precorrin-5B (C1)-methyltransferase	C00019[c] + C16243[c] -> C00021[c] + C11542[c]	MCA2297	MCA2297	2.1.1.195	Porphyrin and chlorophyll metabolism	0	0	1000	0		2.1.1.195
R07765	octadecanoyl-[acp]:NAD+ trans-2-oxidoreductase	C00080[c] + C00004[c] + C16221[c] <=> C00003[c] + C04088[c]	MCA1263	MCA1263	1.3.1.9, 1.3.1.-, 2.3.1.-	Fatty acid biosynthesis	1	-1000	1000	0		1.3.1.9, 1.3.1.-, 2.3.1.-
R07764		C16220[c] <=> C00001[c] + C16221[c]	MCA2445	MCA2445	2.3.1.-, 4.2.1.-	Fatty acid biosynthesis	1	-1000	1000	0		2.3.1.-, 4.2.1.-
R07763		C00080[c] + C00005[c] + C16219[c] <=> C00006[c] + C16220[c]	MCA0927 or MCA2001	MCA0927,MCA2001	1.1.1.100, 2.3.1.-	Fatty acid biosynthesis	1	-1000	1000	0		1.1.1.100, 2.3.1.-
R07762		C01209[c] + C05764[c] <=> C00011[c] + C00229[c] + C16219[c]	MCA0924 or MCA2879 or MCA1999	MCA0924,MCA2879,MCA1999	2.3.1.41, 2.3.1.179, 2.3.1.-	Fatty acid biosynthesis	1	-1000	1000	0		2.3.1.41, 2.3.1.179, 2.3.1.-
R07639	decenoyl-[acyl-carrier-protein] Delta2-trans-Delta3-cis-isomerase	C05754[c] <=> C04180[c]	MCA2878	MCA2878	5.3.3.14	Fatty acid biosynthesis	1	-1000	1000	0		5.3.3.14
R07605	7-aminomethyl-7-carbaguanine:NADP+ oxidoreductase	2 C00080[c] + 2 C00005[c] + C15996[c] -> 2 C00006[c] + C16675[c]	MCA2441	MCA2441	1.7.1.13	Folate biosynthesis	0	0	1000	0		1.7.1.13
R07507		C00080[c] + C00005[c] + C05107[c] <=> C00006[c] + C01164[c]	MCA1404	MCA1404	1.3.1.72	Steroid biosynthesis	1	-1000	1000	0		1.3.1.72
R07499		C00080[c] + C00005[c] + C05108[c] <=> C00006[c] + C15915[c]	MCA1404	MCA1404	1.3.1.72	Steroid biosynthesis	1	-1000	1000	0		1.3.1.72
R07498		C00080[c] + C00005[c] + C05437[c] <=> C00006[c] + C03845[c]	MCA1404	MCA1404	1.3.1.72	Steroid biosynthesis	1	-1000	1000	0		1.3.1.72
R07493		C00080[c] + C00005[c] + C15781[c] -> C00006[c] + C01789[c]	MCA1404	MCA1404	1.3.1.-	Steroid biosynthesis	0	0	1000	0		1.3.1.-
R07488		C00080[c] + C00005[c] + C08821[c] -> C00006[c] + C01753[c]	MCA1404	MCA1404	1.3.1.-	Steroid biosynthesis	0	0	1000	0		1.3.1.-
R07463	glycine:oxygen oxidoreductase	C00007[c] + C00037[c] -> C15809[c] + C00027[c]	MCA2715	MCA2715	1.4.3.19	Thiamine metabolism	0	0	1000	0		1.4.3.19
R07412		C15672[c] -> C15670[c]	MCA1778	MCA1778		Porphyrin and chlorophyll metabolism	0	0	1000	0
R07411	protoheme IX farnesyltransferase	C00001[c] + C00448[c] + C00032[c] -> C00013[c] + C15672[c]	MCA0062	MCA0062	2.5.1.-	Porphyrin and chlorophyll metabolism	0	0	1000	0		2.5.1.-
R07410	L-aspartate:NAD+ oxidoreductase (deaminating)	C00003[c] + C00049[c] -> C00080[c] + C00004[c] + C05840[c]				Nicotinate and nicotinamide metabolism	0	0	1000	0
R07407	L-aspartate:NADP+ oxidoreductase (deaminating)	C00006[c] + C00049[c] -> C00080[c] + C00005[c] + C05840[c]			1.4.1.21	Nicotinate and nicotinamide metabolism	0	0	1000	0		1.4.1.21
R07405	5-carboxyamino-1-(5-phospho-D-ribosyl)imidazole carboxymutase	C15667[c] <=> C04751[c]	MCA2530	MCA2530	5.4.99.18	Purine metabolism	1	-1000	1000	0		5.4.99.18
R07404	5-amino-1-(5-phospho-D-ribosyl)imidazole:carbon-dioxide ligase (ADP-forming)	C00002[c] + C00288[c] + C03373[c] -> C00008[c] + C00009[c] + C15667[c]	MCA2529	MCA2529	6.3.4.18	Purine metabolism	0	0	1000	0		6.3.4.18
R07395	5-(methylthio)-2,3-dioxopentyl-phosphate phosphohydrolase (isomerizing)	C00001[c] + C15650[c] -> C00009[c] + C15606[c]	MCA0797	MCA0797	3.1.3.77	Cysteine and methionine metabolism	0	0	1000	0		3.1.3.77
R07392	S-methyl-5-thio-D-ribulose-1-phosphate hydro-lyase	C04582[c] -> C00001[c] + C15650[c]	MCA0799	MCA0799	4.2.1.109	Cysteine and methionine metabolism	0	0	1000	0		4.2.1.109
R07364	1,2-dihydroxy-5-(methylthio)pent-1-en-3-one:oxygen oxidoreductase (formate-forming)	C00007[c] + C15606[c] -> C00058[c] + C01180[c]	MCA0798	MCA0798	1.13.11.54	Cysteine and methionine metabolism	0	0	1000	0		1.13.11.54
R07363	1,2-dihydroxy-5-(methylthio)pent-1-en-3-one:oxygen oxidoreductase (formate- and CO-forming)	C00007[c] + C15606[c] -> C00058[c] + C00237[c] + C08276[c]	MCA0798	MCA0798	1.13.11.53	Cysteine and methionine metabolism	0	0	1000	0		1.13.11.53
R07323	squalene mutase (cyclizing);	C00001[c] + C00751[c] -> C06309[c]	MCA0812	MCA0812	4.2.1.129	Sesquiterpenoid and triterpenoid biosynthesis	0	0	1000	0		4.2.1.129
R07322	squalene mutase (cyclizing)	C00751[c] -> C06310[c]	MCA0812	MCA0812	5.4.99.17	Sesquiterpenoid and triterpenoid biosynthesis	0	0	1000	0		5.4.99.17
R07302	adenosylcobyric acid:(R)-1-aminopropan-2-ol ligase (ADP-forming)	C00002[c] + C03194[c] + C06507[c] -> C00008[c] + C00009[c] + C06508[c]	MCA2287 or MCA2288	MCA2287,MCA2288	6.3.1.10	Porphyrin and chlorophyll metabolism	0	0	1000	0		6.3.1.10
R07281	D-ribulose 5-phosphate formate-lyase (L-3,4-dihydroxybutan-2-one 4-phosphate-forming)	C00199[c] -> C00058[c] + C15556[c]	MCA1656	MCA1656	4.1.99.12	Riboflavin metabolism	0	0	1000	0		4.1.99.12
R07280	5-amino-6-(5-phospho-D-ribitylamino)uracil phosphohydrolase	C00001[c] + C04454[c] -> C00009[c] + C04732[c]			3.1.3.104	Riboflavin metabolism	0	0	1000	0		3.1.3.104
R07268	ATP:cobinamide Cobeta-adenosyltransferase	C00002[c] + C05774[c] -> C00536[c] + C06508[c]	MCA1814 or MCA2291	MCA1814,MCA2291	2.5.1.17	Porphyrin and chlorophyll metabolism	0	0	1000	0		2.5.1.17
R07168	5-methyltetrahydrofolate:NAD+ oxidoreductase	C00080[c] + C00004[c] + C00143[c] -> C00003[c] + C00440[c]	MCA0137	MCA0137	1.5.1.20	One carbon pool by folate	0	0	1000	0		1.5.1.20
R07136	(2R)-3-sulfolactate:NAD+ oxidoreductase	C00003[c] + C11537[c] <=> C00080[c] + C00004[c] + C05528[c]	MCA0610	MCA0610	1.1.1.37	Cysteine and methionine metabolism	1	-1000	1000	0		1.1.1.37
R07035	Glutathione: 15-HPETE oxidoreductase	C05966[c] + 2 C00051[c] -> C00001[c] + C00127[c] + C04742[c]	MCA0841	MCA0841	1.11.1.9	Arachidonic acid metabolism	0	0	1000	0		1.11.1.9
R07034	Glutathione: 5-HPETE oxidoreductase	2 C00051[c] + C05356[c] -> C00001[c] + C00127[c] + C04805[c]	MCA0841	MCA0841	1.11.1.9	Arachidonic acid metabolism	0	0	1000	0		1.11.1.9
R06927	(2-naphthyl)methanol:NAD+ oxidoreductase	C00003[c] + C02909[c] -> C00080[c] + C00004[c] + C14099[c]	MCA0775	MCA0775	1.1.1.1	Naphthalene degradation	0	0	1000	0		1.1.1.1
R06917	1-hydroxymethylnaphthalene:NAD+ oxidoreductase	C00003[c] + C14089[c] -> C00080[c] + C00004[c] + C14090[c]	MCA0775	MCA0775	1.1.1.1	Naphthalene degradation	0	0	1000	0		1.1.1.1
R06895	coproporphyrinogen-III:S-adenosyl-L-methionine oxidoreductase(decarboxylating)	2 C00019[c] + C03263[c] -> 2 C00011[c] + 2 C05198[c] + 2 C00073[c] + C01079[c]	MCA0115	MCA0115	1.3.98.3	Porphyrin and chlorophyll metabolism	0	0	1000	0		1.3.98.3
R06859		C00019[c] + C13309[c] -> C00021[c] + C02059[c]	MCA2017	MCA2017	2.1.1.163	Ubiquinone and other terpenoid-quinone biosynthesis	0	0	1000	0		2.1.1.163
R06783	trans-cinnamate,NADH:oxygen oxidoreductase (2,3-hydroxylating)	C00080[c] + C00004[c] + C00007[c] + C00423[c] -> C00003[c] + C12622[c]	MCA0987	MCA0987	1.14.12.19	Phenylalanine metabolism	0	0	1000	0		1.14.12.19
R06782	3-phenylpropanoate,NADH:oxygen oxidoreductase (2,3-hydroxylating)	C00080[c] + C00004[c] + C00007[c] + C05629[c] -> C00003[c] + C11588[c]	MCA0987	MCA0987	1.14.12.19	Phenylalanine metabolism	0	0	1000	0		1.14.12.19
R06558		C00044[c] + C06508[c] -> C00035[c] + C06509[c]	MCA0462	MCA0462	2.7.1.156	Porphyrin and chlorophyll metabolism	0	0	1000	0		2.7.1.156
R06529	adenosylcobyric acid:(R)-1-aminopropan-2-yl phosphate ligase	C00002[c] + C06507[c] + C04122[c] -> C00008[c] + C00009[c] + C06509[c]	MCA2287 or MCA2288	MCA2287,MCA2288	6.3.1.10	Porphyrin and chlorophyll metabolism	0	0	1000	0		6.3.1.10
R06514	dTDP-4-dehydro-6-deoxy-alpha-D-glucose 3,5-epimerase;	C11907[c] -> C00688[c]	MCA1284	MCA1284	5.1.3.13	Streptomycin biosynthesis	0	0	1000	0		5.1.3.13
R06513	dTDPglucose 4,6-hydro-lyase	C00842[c] -> C00001[c] + C11907[c]	MCA1282	MCA1282	4.2.1.46	Streptomycin biosynthesis	0	0	1000	0		4.2.1.46
R06447	(2E,6E)-farnesyl-diphosphate:isopentenyl-diphosphate cistransferase (adding 8 isopentenyl units)	C00448[c] + 8 C00129[c] -> 8 C00013[c] + C04574[c]	MCA0571	MCA0571	2.5.1.31	Terpenoid backbone biosynthesis	0	0	1000	0		2.5.1.31
R06146	2-Octaprenyl-3-methyl-6-methoxy-1,4-benzoquinone ,NADPH2:oxygen oxidoreductase	C00080[c] + C00005[c] + C00007[c] + C05814[c] -> C00001[c] + C00006[c] + C05815[c]	MCA1754	MCA1754	1.14.13.-	Ubiquinone and other terpenoid-quinone biosynthesis	0	0	1000	0		1.14.13.-
R05884	isopentenyl-diphosphate:ferredoxin oxidoreductase	2 C00080[c] + C11811[c] + 2 C00138[c] -> C00001[c] + C00129[c] + 2 C00139[c]	MCA1815	MCA1815	1.17.7.4	Terpenoid backbone biosynthesis	0	0	1000	0		1.17.7.4
R05838	pyridoxine 5'-phosphate synthase	C11437[c] + C11638[c] -> C00009[c] + 2 C00001[c] + C00627[c]	MCA1667	MCA1667	2.6.99.2	Vitamin B6 metabolism	0	0	1000	0		2.6.99.2
R05815	cobyrinate:L-glutamine amido-ligase (ADP-forming)	2 C00001[c] + 2 C00002[c] + C05773[c] + 2 C00064[c] -> 2 C00008[c] + 2 C00009[c] + 2 C00025[c] + C06504[c]	MCA2290	MCA2290	6.3.5.11	Porphyrin and chlorophyll metabolism	0	0	1000	0		6.3.5.11
R05814	precorrin-8 11,12-methylmutase	C11545[c] -> C05773[c]	MCA2298	MCA2298	5.4.99.60	Porphyrin and chlorophyll metabolism	0	0	1000	0		5.4.99.60
R05810	cobalt-precorrin-4 methyltransferase	C00019[c] + C11540[c] -> C00021[c] + C16242[c]	MCA2300	MCA2300	2.1.1.271	Porphyrin and chlorophyll metabolism	0	0	1000	0		2.1.1.271
R05809		C00019[c] + C11539[c] -> C00021[c] + C11540[c]	MCA2293	MCA2293	2.1.1.131	Porphyrin and chlorophyll metabolism	0	0	1000	0		2.1.1.131
R05808	S-adenosyl-L-methionine:cobalt-factor-II C20-methyltransferase	C00019[c] + C11538[c] -> C00021[c] + C17401[c]	MCA2295	MCA2295	2.1.1.151	Porphyrin and chlorophyll metabolism	0	0	1000	0		2.1.1.151
R05807	sirohydrochlorin cobalt-lyase	C05778[c] + C00175[c] -> 2 C00080[c] + C11538[c]	MCA2299	MCA2299	4.99.1.3	Porphyrin and chlorophyll metabolism	0	0	1000	0		4.99.1.3
R05731	sterol,NADPH:oxygen oxidoreductase (14-methyl cleaving)	3 C00080[c] + 3 C00005[c] + 3 C00007[c] + C01943[c] -> 4 C00001[c] + 3 C00006[c] + C00058[c] + C11508[c]	MCA2711	MCA2711	1.14.13.70	Steroid biosynthesis	0	0	1000	0		1.14.13.70
R05705	FMNH2:NAD+ oxidoreductase	C00080[c] + C00004[c] + C00061[c] -> C00003[c] + C01847[c]			1.5.1.42, 1.5.1.-	Riboflavin metabolism	0	0	1000	0		1.5.1.42, 1.5.1.-
R05703	lanosterol D24-reductase	C00006[c] + C01189[c] <=> C00080[c] + C00005[c] + C05439[c]	MCA1404	MCA1404	1.3.1.72	Steroid biosynthesis	1	-1000	1000	0		1.3.1.72
R05692	GDP-L-fucose:NADP+ 4-oxidoreductase (3,5-epimerizing)	C00080[c] + C00005[c] + C01222[c] -> C00006[c] + C00325[c]	MCA1147	MCA1147	1.1.1.271	Fructose and mannose metabolism	0	0	1000	0		1.1.1.271
R05688	1-Deoxy-D-xylulose-5-phosphate isomeroreductase	C00080[c] + C00005[c] + C11437[c] -> C00006[c] + C11434[c]	MCA0573	MCA0573	1.1.1.267	Terpenoid backbone biosynthesis	0	0	1000	0		1.1.1.267
R05681	NAD-dependent threonine 4-phosphate dehydrogenase	C00003[c] + C06055[c] -> C00080[c] + C00004[c] + C07335[c]	MCA0603	MCA0603	1.1.1.262	Vitamin B6 metabolism	0	0	1000	0		1.1.1.262
R05662	UDP-N-acetyl-D-glucosamine:N-acetyl-alpha-D-muramyl(oyl-L-Ala-gamma-D-Glu-L-Lys-D-Ala-D-Ala)-diphosphoundecaprenol 4-beta-N-acetylglucosaminlytransferase	C00043[c] + C04851[c] -> C00015[c] + C05893[c]	MCA2429	MCA2429	2.4.1.227	Peptidoglycan biosynthesis	0	0	1000	0		2.4.1.227
R05647	D-glycero-beta-D-manno-heptose 1,7-bisphosphate 7-phosphohydrolase	C00001[c] + C11472[c] -> C00009[c] + C07838[c]	MCA2051	MCA2051	3.1.3.82	Lipopolysaccharide biosynthesis	0	0	1000	0		3.1.3.82
R05646	ATP:D-glycero-beta-D-manno-heptose 7-phosphate 1-phosphotransferase	C00002[c] + C07836[c] -> C00008[c] + C11472[c]	MCA1736	MCA1736	2.7.1.167	Lipopolysaccharide biosynthesis	0	0	1000	0		2.7.1.167
R05645	D-glycero-beta-D-manno-heptose-7-phosphate aldose-ketose-isomerase	C05382[c] -> C07836[c]	MCA0183	MCA0183	5.3.1.28	Lipopolysaccharide biosynthesis	0	0	1000	0		5.3.1.28
R05644	ATP:D-glycero-beta-D-manno-heptose 1-phosphate adenylyltransferase	C00002[c] + C07838[c] -> C00013[c] + C06397[c]	MCA1736	MCA1736	2.7.7.70	Lipopolysaccharide biosynthesis	0	0	1000	0		2.7.7.70
R05640	Lanosterol,NADPH:oxygen oxidoreductase (14-methyl cleaving)	3 C00080[c] + 3 C00005[c] + 3 C00007[c] + C01724[c] -> 4 C00001[c] + 3 C00006[c] + C00058[c] + C11455[c]	MCA2711	MCA2711	1.14.13.70	Steroid biosynthesis	0	0	1000	0		1.14.13.70
R05639	4,4-dimethyl-5a-cholesta-8,24-dien-3b-ol:NADP+ D14-oxidoreductase	C00080[c] + C00005[c] + C11455[c] -> C00006[c] + C05108[c]			1.3.1.70	Steroid biosynthesis	0	0	1000	0		1.3.1.70
R05637	2-Phospho-4-(cytidine 5'-diphospho)-2-C-methyl-D-erythritol CMP-lyase (cyclizing)	C11436[c] -> C00055[c] + C11453[c]	MCA2518	MCA2518	4.6.1.12	Terpenoid backbone biosynthesis	0	0	1000	0		4.6.1.12
R05636	1-Deoxy-D-xylulose-5-phosphate pyruvate-lyase (carboxylating)	C00022[c] + C00118[c] -> C00011[c] + C11437[c]	MCA0817	MCA0817	2.2.1.7	Thiamine metabolism	0	0	1000	0		2.2.1.7
R05634	ATP:4-(Cytidine 5'-diphospho)-2-C-methyl-D-erythritol 2-phosphotransferase	C00002[c] + C11435[c] -> C00008[c] + C11436[c]	MCA1055	MCA1055	2.7.1.148	Terpenoid backbone biosynthesis	0	0	1000	0		2.7.1.148
R05633	CTP: 2-C-Methyl-D-erythritol 4-phosphate cytidylyltransferase	C00063[c] + C11434[c] -> C00013[c] + C11435[c]	MCA2517	MCA2517	2.7.7.60	Terpenoid backbone biosynthesis	0	0	1000	0		2.7.7.60
R05630	UDP-N-acetylmuramoyl-L-alanyl-gamma-D-glutamyl-meso-2,6-diaminopimeloyl-D-alanyl-D-alanine:undecaprenyl-phosphate phospho-N-acetylmuramoyl-pentapeptide-transferase	C17556[c] + C04882[c] -> C05897[c] + C00105[c]	MCA2432	MCA2432	2.7.8.13	Peptidoglycan biosynthesis	0	0	1000	0		2.7.8.13
R05629	UDPMurAc(oyl-L-Ala-D-gamma-Glu-L-Lys-D-Ala-D-Ala):undecaprenyl-phosphate phospho-N-acetylmuramoyl-pentapeptide-transferase	C17556[c] + C04702[c] -> C04851[c] + C00105[c]	MCA2432	MCA2432	2.7.8.13	Peptidoglycan biosynthesis	0	0	1000	0		2.7.8.13
R05627	undecaprenyl-diphosphate phosphohydrolase	C00001[c] + C04574[c] -> C00009[c] + C17556[c]	MCA0666 or MCA2985	MCA0666,MCA2985	3.6.1.27	Peptidoglycan biosynthesis	0	0	1000	0		3.6.1.27
R05615	all-trans-octaprenyl-diphosphate:4-hydroxybenzoate 3-octaprenyltransferase	C04146[c] + C00156[c] -> C00013[c] + C05809[c]	MCA1336	MCA1336	2.5.1.39	Ubiquinone and other terpenoid-quinone biosynthesis	0	0	1000	0		2.5.1.39
R05614		C00019[c] + C05815[c] -> C00021[c] + C00399[c]	MCA1164 or MCA1272	MCA1164,MCA1272	2.1.1.64	Ubiquinone and other terpenoid-quinone biosynthesis	0	0	1000	0		2.1.1.64
R05605	2-dehydro-3-deoxy-6-phospho-D-gluconate D-glyceraldehyde-3-phosphate-lyase (pyruvate-forming)	C04442[c] <=> C00022[c] + C00118[c]	MCA0038	MCA0038		Pentose phosphate pathway	1	-1000	1000	0
R05591	Nitrile aminohydrolase	2 C00001[c] + C09814[c] -> C00014[c] + C00180[c]	MCA0381	MCA0381	3.5.5.1	Aminobenzoate degradation	0	0	1000	0		3.5.5.1
R05553	4-amino-4-deoxychorismate pyruvate-lyase	C11355[c] -> C00022[c] + C00568[c]	MCA1998	MCA1998	4.1.3.38	Folate biosynthesis	0	0	1000	0		4.1.3.38
R05496	reduced ferredoxin:acetylene oxidoreductase (ATP-hydrolysing)	C00001[c] + 2 C00080[c] + C00002[c] + C00138[c] + C01548[c] -> C00008[c] + C00009[c] + C00139[c] + C06547[c]	MCA0229 and MCA0230 and MCA0231	MCA0229,MCA0230,MCA0231	1.18.6.1	Chloroalkane and chloroalkene degradation	0	0	1000	0		1.18.6.1
R05339	D-arabino-hex-3-ulose-6-phosphate isomerase	C06019[c] -> C00085[c]	MCA2738 or MCA3043 or MCA3049	MCA2738,MCA3043,MCA3049	5.3.1.27	Methane metabolism	0	0	1000	0		5.3.1.27
R05338	D-arabino-hex-3-ulose-6-phosphate formaldehyde-lyase (D-ribulose-5-phosphate-forming)	C00199[c] + C00067[c] <=> C06019[c]	MCA2738 or MCA3043 or MCA3049	MCA2738,MCA3043,MCA3049	4.1.2.43	Pentose phosphate pathway	1	-1000	1000	0		4.1.2.43
R05332	Acetyl-CoA:D-glucosamine-1-phosphate N-acetyltransferase	C00024[c] + C06156[c] -> C00010[c] + C04501[c]	MCA0014	MCA0014	2.3.1.157	Amino sugar and nucleotide sugar metabolism	0	0	1000	0		2.3.1.157
R05234	cis-3-chloro-2-propene-1-ol:NAD+ oxidoreductase	C00003[c] + C06612[c] -> C00080[c] + C00004[c] + C16348[c]	MCA0775	MCA0775	1.1.1.1	Chloroalkane and chloroalkene degradation	0	0	1000	0		1.1.1.1
R05233	trans-3-Chloro-2-propene-1-ol:NAD+ oxidoreductase	C00003[c] + C06611[c] -> C00080[c] + C00004[c] + C06613[c]	MCA0775	MCA0775	1.1.1.1	Chloroalkane and chloroalkene degradation	0	0	1000	0		1.1.1.1
R05225		4 C00001[c] + 4 C00002[c] + 4 C00064[c] + C06506[c] -> 4 C00008[c] + 4 C00009[c] + 4 C00025[c] + C06507[c]	MCA2304	MCA2304	6.3.5.10	Porphyrin and chlorophyll metabolism	0	0	1000	0		6.3.5.10
R05224		2 C00001[c] + 2 C00002[c] + 2 C00064[c] + C06399[c] -> 2 C00008[c] + 2 C00009[c] + 2 C00025[c] + C06503[c]	MCA2290	MCA2290	6.3.5.9	Porphyrin and chlorophyll metabolism	0	0	1000	0		6.3.5.9
R05223		C06510[c] + C05775[c] -> C00144[c] + C00194[c]	MCA0465	MCA0465	2.7.8.26	Porphyrin and chlorophyll metabolism	0	0	1000	0		2.7.8.26
R05222	GTP:adenosylcobinamide-phosphate guanylyltransferase	C00044[c] + C06509[c] -> C00013[c] + C06510[c]	MCA0462	MCA0462	2.7.7.62	Porphyrin and chlorophyll metabolism	0	0	1000	0		2.7.7.62
R05221		C00002[c] + C06508[c] -> C00008[c] + C06509[c]	MCA0462	MCA0462	2.7.1.156	Porphyrin and chlorophyll metabolism	0	0	1000	0		2.7.1.156
R05220	ATP:cob(I)yrinic acid-a,c-diamide Cobeta-adenosyltransferase	C00002[c] + C06505[c] -> C00536[c] + C06506[c]	MCA1814 or MCA2291	MCA1814,MCA2291	2.5.1.17	Porphyrin and chlorophyll metabolism	0	0	1000	0		2.5.1.17
R05185	reduced ferredoxin:dinitrogen oxidoreductase (ATP-hydrolysing)	16 C00001[c] + 8 C00080[c] + 16 C00002[c] + 8 C00138[c] + C00697[c] -> 16 C00008[c] + 16 C00009[c] + 2 C00014[c] + 8 C00139[c] + C00282[c]	MCA0229 and MCA0230 and MCA0231	MCA0229,MCA0230,MCA0231	1.18.6.1	Nitrogen metabolism	0	0	1000	0		1.18.6.1
R05181	S-adenosyl-L-methionine:precorrin-4 C11 methyltransferase	C00019[c] + C06407[c] -> C00021[c] + C06416[c]	MCA2300	MCA2300	2.1.1.133	Porphyrin and chlorophyll metabolism	0	0	1000	0		2.1.1.133
R05180	S-adenosyl-L-methionine:precorrin-3B C17-methyltransferase	C00019[c] + C06406[c] -> C00021[c] + C06407[c]	MCA2293	MCA2293	2.1.1.131	Porphyrin and chlorophyll metabolism	0	0	1000	0		2.1.1.131
R05177	precorrin 8X 11,12-methylmutase	C06408[c] -> C06399[c]	MCA2298	MCA2298	5.4.99.61	Porphyrin and chlorophyll metabolism	0	0	1000	0		5.4.99.61
R05149	S-Adenosyl-L-methionine:1-precorrin-6Y C5,15-methyltransferase (C-12-decarboxylating)	2 C00019[c] + C06319[c] -> C00011[c] + 2 C00021[c] + C06408[c]	MCA2296	MCA2296	2.1.1.132	Porphyrin and chlorophyll metabolism	0	0	1000	0		2.1.1.132
R05086	O-Phospho-4-hydroxy-L-threonine phospho-lyase (adding water)	C00001[c] + C06055[c] -> C00009[c] + C06056[c]	MCA0596	MCA0596	4.2.3.1	Vitamin B6 metabolism	0	0	1000	0		4.2.3.1
R05085	O-Phospho-4-hydroxy-L-threonine:2-oxoglutarate aminotransferase	C00026[c] + C06055[c] <=> C00025[c] + C06054[c]	MCA1420	MCA1420	2.6.1.52	Vitamin B6 metabolism	1	-1000	1000	0		2.6.1.52
R05074	CMP-3-deoxy-D-manno-oct-2-ulosonate:(KDO)-lipid IVA 3-deoxy-D-manno-oct-2-ulosonate transferase	C04121[c] + C06024[c] -> C00055[c] + C06025[c]	MCA2034	MCA2034	2.4.99.13	Lipopolysaccharide biosynthesis	0	0	1000	0		2.4.99.13
R05071	(S)-2-Acetolactate methylmutase	C06010[c] <=> C04181[c]	MCA2272	MCA2272	1.1.1.86	Valine, leucine and isoleucine biosynthesis	1	-1000	1000	0		1.1.1.86
R05070	(R)-2,3-Dihydroxy-3-methylpentanoate hydro-lyase	C06007[c] -> C00001[c] + C00671[c]	MCA2082	MCA2082	4.2.1.9	Valine, leucine and isoleucine biosynthesis	0	0	1000	0		4.2.1.9
R05069	(S)-2-Aceto-2-hydroxybutanoate:NADP+ oxidoreductase (isomerizing)	C06006[c] <=> C14463[c]	MCA2272	MCA2272	1.1.1.86	Valine, leucine and isoleucine biosynthesis	1	-1000	1000	0		1.1.1.86
R05068	(R)-2,3-Dihydroxy-3-methylpentanoate:NADP+ oxidoreductase (isomerizing)	C00006[c] + C06007[c] <=> C00080[c] + C00005[c] + C14463[c]	MCA2272	MCA2272	1.1.1.86	Valine, leucine and isoleucine biosynthesis	1	-1000	1000	0		1.1.1.86
R05053	D-aspartate:2-oxoglutarate aminotransferase	C05947[c] + C00036[c] -> C05946[c] + C00402[c]	MCA0106	MCA0106	2.6.1.21	Arginine and proline metabolism	0	0	1000	0		2.6.1.21
R05052	L-erythro-4-hydroxyglutamate:2-oxoglutarate aminotransferase	C00026[c] + C05947[c] -> C00025[c] + C05946[c]	MCA2202	MCA2202	2.6.1.1	Arginine and proline metabolism	0	0	1000	0		2.6.1.1
R05048	2,5-diaminopyrimidine nucleoside triphosphate mutase	C05923[c] -> C06148[c]	MCA1670 or MCA2318	MCA1670,MCA2318	3.5.4.16	Folate biosynthesis	0	0	1000	0		3.5.4.16
R05046	formamidopyrimidine nucleoside triphosphate amidohydrolase	C00001[c] + C05922[c] -> C00058[c] + C05923[c]	MCA1670 or MCA2318	MCA1670,MCA2318	3.5.4.16	Folate biosynthesis	0	0	1000	0		3.5.4.16
R05032	UDP-N-acetyl-D-glucosamine:undecaprenyl-diphospho-N-acetylmuramoyl-L-alanyl-gamma-D-glutamyl-meso-2,6-diaminopimeloyl-D-alanyl-D-alanine 4-beta-N-acetylglucosaminlytransferase	C00043[c] + C05897[c] -> C00015[c] + C05898[c]	MCA2429	MCA2429	2.4.1.227	Peptidoglycan biosynthesis	0	0	1000	0		2.4.1.227
R05000	polyisopentenylpyrolinate:4-hydroxybenzoate nonaprenyltransferase	C00156[c] + C05847[c] -> C00013[c] + C05848[c]	MCA1336	MCA1336	2.5.1.39	Ubiquinone and other terpenoid-quinone biosynthesis	0	0	1000	0		2.5.1.39
R04993	S-adenosyl-L-methione:demethylmenaquinone methyltransferase	C00019[c] + C05818[c] -> C00021[c] + C00828[c]	MCA2017	MCA2017	2.1.1.163	Ubiquinone and other terpenoid-quinone biosynthesis	0	0	1000	0		2.1.1.163
R04990	UDP-L-rhamnose:flavonol-3-O-D-glucoside L-rhamnosyltransferase	C00019[c] + C05813[c] -> C00021[c] + C05814[c]	MCA2017	MCA2017	2.1.1.201	Ubiquinone and other terpenoid-quinone biosynthesis	0	0	1000	0		2.1.1.201
R04989		C00005[c] + C00007[c] + C05812[c] -> C00001[c] + C00006[c] + C05813[c]	MCA2759	MCA2759	1.14.13.-	Ubiquinone and other terpenoid-quinone biosynthesis	0	0	1000	0		1.14.13.-
R04988	S-adenosyl-L-methionine:3-(all-trans-octaprenyl)benzene-1,2-diol 2-O-methyltransferase	C00019[c] + C05811[c] -> C00021[c] + C05812[c]	MCA1164 or MCA1272	MCA1164,MCA1272	2.1.1.222	Ubiquinone and other terpenoid-quinone biosynthesis	0	0	1000	0		2.1.1.222
R04986	3-octaprenyl-4-hydroxybenzoate carboxy-lyase	C05809[c] -> C00011[c] + C05810[c]	MCA3063	MCA3063	4.1.1.98	Ubiquinone and other terpenoid-quinone biosynthesis	0	0	1000	0		4.1.1.98
R04985	4-hydroxy-3-polyprenylbenzoate carboxy-lyase	C05848[c] -> C00011[c] + C05807[c]	MCA1240 and MCA3063	MCA1240,MCA3063	4.1.1.98	Ubiquinone and other terpenoid-quinone biosynthesis	0	0	1000	0		4.1.1.98
R04972	Uroporphyrinogen I carboxy-lyase	C05766[c] -> 4 C00011[c] + C05768[c]	MCA0332	MCA0332	4.1.1.37	Porphyrin and chlorophyll metabolism	0	0	1000	0		4.1.1.37
R04970	hexadecanoyl-[acp]:NADP+ trans-2-oxidoreductase	C00006[c] + C05764[c] <=> C00080[c] + C00005[c] + C05763[c]	MCA1263	MCA1263		Fatty acid biosynthesis	1	-1000	1000	0
R04969	hexadecanoyl-[acp]:NAD+ trans-2-oxidoreductase	C00003[c] + C05764[c] <=> C00080[c] + C00004[c] + C05763[c]	MCA1263	MCA1263	1.3.1.9, 2.3.1.-	Fatty acid biosynthesis	1	-1000	1000	0		1.3.1.9, 2.3.1.-
R04968	Tetradecanoyl-[acyl-carrier protein]:malonyl-[acyl-carrier-protein] C-acyltransferase (decarboxylating)	C01209[c] + C05761[c] -> C00011[c] + C00229[c] + C05762[c]	MCA0924 or MCA2879 or MCA1999	MCA0924,MCA2879,MCA1999	2.3.1.41, 2.3.1.179	Fatty acid biosynthesis	0	0	1000	0		2.3.1.41, 2.3.1.179
R04967	tetradecanoyl-[acp]:NADP+ trans-2-oxidoreductase	C00006[c] + C05761[c] <=> C00080[c] + C00005[c] + C05760[c]	MCA1263	MCA1263		Fatty acid biosynthesis	1	-1000	1000	0
R04966	tetradecanoyl-[acp]:NAD+ trans-2-oxidoreductase	C00003[c] + C05761[c] <=> C00080[c] + C00004[c] + C05760[c]	MCA1263	MCA1263	1.3.1.9, 2.3.1.-	Fatty acid biosynthesis	1	-1000	1000	0		1.3.1.9, 2.3.1.-
R04965	(3R)-3-Hydroxybutanoyl-[acyl-carrier-protein] hydro-lyase	C05757[c] <=> C00001[c] + C05758[c]	MCA2878 or MCA2445	MCA2878,MCA2445	2.3.1.-, 4.2.1.59	Fatty acid biosynthesis	1	-1000	1000	0		2.3.1.-, 4.2.1.59
R04964	(3R)-3-Hydroxydodecanoyl-[acyl-carrier-protein]:NADP+ oxidoreductase	C00006[c] + C05757[c] <=> C00080[c] + C00005[c] + C05756[c]	MCA0927 or MCA2001	MCA0927,MCA2001	1.1.1.100, 2.3.1.-	Fatty acid biosynthesis	1	-1000	1000	0		1.1.1.100, 2.3.1.-
R04963	Decanoyl-[acyl-carrier protein]:malonyl-[acyl-carrier-protein] C-acyltransferase (decarboxylating)	C01209[c] + C05755[c] -> C00011[c] + C00229[c] + C05756[c]	MCA0924 or MCA2879 or MCA1999	MCA0924,MCA2879,MCA1999	2.3.1.41, 2.3.1.179	Fatty acid biosynthesis	0	0	1000	0		2.3.1.41, 2.3.1.179
R04962	decanoyl-[acp]:NADP+ trans-2-oxidoreductase	C00006[c] + C05755[c] <=> C00080[c] + C00005[c] + C05754[c]	MCA1263	MCA1263		Fatty acid biosynthesis	1	-1000	1000	0
R04961	decanoyl-[acp]:NAD+ trans-2-oxidoreductase	C00003[c] + C05755[c] <=> C00080[c] + C00004[c] + C05754[c]	MCA1263	MCA1263	1.3.1.9, 2.3.1.-	Fatty acid biosynthesis	1	-1000	1000	0		1.3.1.9, 2.3.1.-
R04960	Octanoyl-[acyl-carrier protein]:malonyl-[acyl-carrier-protein] C-acyltransferase (decarboxylating)	C01209[c] + C05752[c] -> C00011[c] + C00229[c] + C05753[c]	MCA0924 or MCA2879 or MCA1999	MCA0924,MCA2879,MCA1999	2.3.1.41, 2.3.1.179	Fatty acid biosynthesis	0	0	1000	0		2.3.1.41, 2.3.1.179
R04959	octanoyl-[acp]:NADP+ trans-2-oxidoreductase	C00006[c] + C05752[c] <=> C00080[c] + C00005[c] + C05751[c]	MCA1263	MCA1263		Fatty acid biosynthesis	1	-1000	1000	0
R04958	octanoyl-[acp]:NAD+ trans-2-oxidoreductase	C00003[c] + C05752[c] <=> C00080[c] + C00004[c] + C05751[c]	MCA1263	MCA1263	1.3.1.9, 2.3.1.-	Fatty acid biosynthesis	1	-1000	1000	0		1.3.1.9, 2.3.1.-
R04957	hexanoyl-[acyl-carrier protein]:malonyl-[acyl-carrier-protein] C-acyltransferase (decarboxylating)	C01209[c] + C05749[c] -> C00011[c] + C00229[c] + C05750[c]	MCA0924 or MCA2879 or MCA1999	MCA0924,MCA2879,MCA1999	2.3.1.41, 2.3.1.179	Fatty acid biosynthesis	0	0	1000	0		2.3.1.41, 2.3.1.179
R04956	hexanoyl-[acp]:NADP+ trans-2-oxidoreductase	C00006[c] + C05749[c] <=> C00080[c] + C00005[c] + C05748[c]	MCA1263	MCA1263		Fatty acid biosynthesis	1	-1000	1000	0
R04955	hexanoyl-[acp]:NAD+ trans-2-oxidoreductase	C00003[c] + C05749[c] <=> C00080[c] + C00004[c] + C05748[c]	MCA1263	MCA1263	1.3.1.9, 2.3.1.-	Fatty acid biosynthesis	1	-1000	1000	0		1.3.1.9, 2.3.1.-
R04954	(3R)-3-Hydroxybutanoyl-[acyl-carrier-protein] hydro-lyase	C05747[c] <=> C00001[c] + C05748[c]	MCA2878 or MCA2445	MCA2878,MCA2445	2.3.1.-, 4.2.1.59	Fatty acid biosynthesis	1	-1000	1000	0		2.3.1.-, 4.2.1.59
R04953	(3R)-3-Hydroxyhexanoyl-[acyl-carrier-protein]:NADP+ oxidoreductase	C00006[c] + C05747[c] <=> C00080[c] + C00005[c] + C05746[c]	MCA0927 or MCA2001	MCA0927,MCA2001	1.1.1.100, 2.3.1.-	Fatty acid biosynthesis	1	-1000	1000	0		1.1.1.100, 2.3.1.-
R04952	butyryl-[acyl-carrier protein]:malonyl-[acyl-carrier-protein] C-acyltransferase (decarboxylating)	C01209[c] + C05745[c] -> C00011[c] + C00229[c] + C05746[c]	MCA0924 or MCA2879 or MCA1999	MCA0924,MCA2879,MCA1999	2.3.1.41, 2.3.1.179	Fatty acid biosynthesis	0	0	1000	0		2.3.1.41, 2.3.1.179
R04941	Selenocystathionine L-homocysteine-lyase (deaminating)	C00001[c] + C05699[c] -> C00022[c] + C00014[c] + C05698[c]	MCA1021	MCA1021	4.4.1.8	Selenocompound metabolism	0	0	1000	0		4.4.1.8
R04929	ATP:selenate adenylyltransferase	C00002[c] + C05697[c] -> C00013[c] + C05686[c]	MCA2628 and MCA2629	MCA2628,MCA2629	2.7.7.4	Selenocompound metabolism	0	0	1000	0		2.7.7.4
R04880	3,4-dihydroxyphenylethyleneglycol:NAD+ oxidoreductase	C00003[c] + C05576[c] <=> C00080[c] + C00004[c] + C05577[c]	MCA0775	MCA0775	1.1.1.1	Tyrosine metabolism	1	-1000	1000	0		1.1.1.1
R04779	ATP:D-fructose-6-phosphate 1-phosphotransferase	C05345[c] + C00002[c] -> C00008[c] + C05378[c]	MCA1251	MCA1251	2.7.1.11	Glycolysis / Gluconeogenesis	0	0	1000	0		2.7.1.11
R04726	dodecanoyl-[acyl-carrier-protein]:malonyl-[acyl-carrier-protein] C-acyltransferase (decarboxylating)	C01209[c] + C05223[c] -> C00011[c] + C00229[c] + C05759[c]	MCA0924 or MCA2879 or MCA1999	MCA0924,MCA2879,MCA1999	2.3.1.41, 2.3.1.179	Fatty acid biosynthesis	0	0	1000	0		2.3.1.41, 2.3.1.179
R04725	dodecanoyl-[acp]:NADP+ trans-2-oxidoreductase	C00006[c] + C05223[c] <=> C00080[c] + C00005[c] + C05758[c]	MCA1263	MCA1263		Fatty acid biosynthesis	1	-1000	1000	0
R04724	dodecanoyl-[acp]:NAD+ trans-2-oxidoreductase	C00003[c] + C05223[c] <=> C00080[c] + C00004[c] + C05758[c]	MCA1263	MCA1263	1.3.1.9, 2.3.1.-	Fatty acid biosynthesis	1	-1000	1000	0		1.3.1.9, 2.3.1.-
R04658	CMP-3-deoxy-D-manno-oct-2-ulosonate:lipid IVA 3-deoxy-D-manno-oct-2-ulosonate transferase	C04121[c] + C04919[c] -> C00055[c] + C06024[c]	MCA2034	MCA2034	2.4.99.12	Lipopolysaccharide biosynthesis	0	0	1000	0		2.4.99.12
R04657	ATP:2,3,2',3'-tetrakis(3-hydroxytetradecanoyl)-D-glucosaminyl-beta-D-1,6-glucosaminyl-alpha-phosphate 4-O'-phosphotransferase	C00002[c] + C04932[c] -> C00008[c] + C04919[c]	MCA0633	MCA0633	2.7.1.130	Lipopolysaccharide biosynthesis	0	0	1000	0		2.7.1.130
R04640	N-(5'-phospho-D-ribosylformimino)-5-amino-1- (5''-phospho-D-ribosyl)-4-imidazolecarboxamide ketol-isomerase;	C04896[c] <=> C04916[c]	MCA2803 or MCA2867	MCA2803,MCA2867	5.3.1.16	Histidine metabolism	1	-1000	1000	0		5.3.1.16
R04639	2-amino-4-hydroxy-6-(erythro-1,2,3-trihydroxypropyl) dihydropteridine triphosphate hydrolase	C06148[c] -> C00001[c] + C04895[c]	MCA1670 or MCA2318	MCA1670,MCA2318	3.5.4.16	Folate biosynthesis	0	0	1000	0		3.5.4.16
R04620	2-Amino-4-hydroxy-6-(erythro-1,2,3-trihydroxypropyl) dihydropteridine triphosphate phosphohydrolase (alkaline optimum)	3 C00001[c] + C04895[c] -> 3 C00009[c] + C04874[c]	MCA0221 or MCA2187	MCA0221,MCA2187	3.1.3.1	Folate biosynthesis	0	0	1000	0		3.1.3.1
R04617	UDP-N-acetylmuramoyl-L-alanyl-D-glutamyl-meso-2,6-diaminoheptanedioate:D-alanyl-D-alanine ligase(ADP-forming)	C00002[c] + C00993[c] + C04877[c] -> C00008[c] + C00009[c] + C04882[c]	MCA1294	MCA1294	6.3.2.10	Lysine biosynthesis	0	0	1000	0		6.3.2.10
R04606	UDP-2,3-bis(3-hydroxytetradecanoyl)glucosamine:2,3-bis-(3-hydroxytetradecanoyl)-alpha-D-glucosaminyl-1-phosphate 2,3-bis(3-hydroxytetradecanoyl)-glucosaminyltransferase	C04824[c] + C04652[c] -> C00015[c] + C04932[c]	MCA0400	MCA0400	2.4.1.182	Lipopolysaccharide biosynthesis	0	0	1000	0		2.4.1.182
R04594		C00001[c] + C04778[c] -> C00009[c] + C05775[c]	MCA0464 or MCA1249	MCA0464,MCA1249	3.1.3.73	Porphyrin and chlorophyll metabolism	0	0	1000	0		3.1.3.73
R04591	1-(5-Phosphoribosyl)-5-amino-4-carboxyimidazole:L-aspartate ligase (ADP-forming)	C00002[c] + C00049[c] + C04751[c] -> C00008[c] + C00009[c] + C04823[c]	MCA0021	MCA0021	6.3.2.6	Purine metabolism	0	0	1000	0		6.3.2.6
R04587	UDP-3-O-[(3R)-3-hydroxymyristoyl]-N-acetylglucosamine amidohydrolase	C00001[c] + C04738[c] -> C00033[c] + C06022[c]	MCA2422	MCA2422	3.5.1.108	Lipopolysaccharide biosynthesis	0	0	1000	0		3.5.1.108
R04573	UDP-N-acetylmuramoyl-L-alanyl-D-glutamyl-L-lysine:alanyl-D-alanine ligase (ADP-forming)	C00002[c] + C00993[c] + C05892[c] -> C00008[c] + C00009[c] + C04702[c]	MCA1294	MCA1294	6.3.2.10	Peptidoglycan biosynthesis	0	0	1000	0		6.3.2.10
R04568	(3R)-3-Hydroxypalmitoyl-[acyl-carrier-protein] hydro-lyase	C04688[c] <=> C00001[c] + C05760[c]	MCA2878 or MCA2445	MCA2878,MCA2445	2.3.1.-, 4.2.1.59	Fatty acid biosynthesis	1	-1000	1000	0		2.3.1.-, 4.2.1.59
R04567	(R)-3-Hydroxytetradecanoly-[acyl-carrier-protein]:UDP-N-acetyl-glucosamine 3-O-(3-hydroxytetradecanoyl)transferase	C00043[c] + C04688[c] -> C00229[c] + C04738[c]	MCA0397 or MCA2444	MCA0397,MCA2444	2.3.1.129	Lipopolysaccharide biosynthesis	0	0	1000	0		2.3.1.129
R04566	(3R)-3-Hydroxytetradecanoyl-[acyl-carrier-protein]:NADP+ oxidoreductase	C00006[c] + C04688[c] <=> C00080[c] + C00005[c] + C05759[c]	MCA0927 or MCA2001	MCA0927,MCA2001	1.1.1.100, 2.3.1.-	Fatty acid biosynthesis	1	-1000	1000	0		1.1.1.100, 2.3.1.-
R04560	10-Formyltetrahydrofolate:5'-phosphoribosyl-5-amino-4-imidazolecarboxamide formyltransferase	C00234[c] + C04677[c] <=> C04734[c] + C00101[c]	MCA1747	MCA1747	2.1.2.3	Purine metabolism	1	-1000	1000	0		2.1.2.3
R04559	1-(5'-Phosphoribosyl)-5-amino-4-(N-succinocarboxamide)-imidazole AMP-lyase	C04823[c] <=> C04677[c] + C00122[c]	MCA1784	MCA1784	4.3.2.2	Purine metabolism	1	-1000	1000	0		4.3.2.2
R04558		C00064[c] + C04916[c] -> C00025[c] + C04677[c] + C04666[c]	MCA2802 and MCA2804	MCA2802, MCA2804	2.4.2.-, 4.1.3.-	Histidine metabolism	0	0	1000	0		2.4.2.-, 4.1.3.-
R04550	(3R)-3-hydroxymyristoyl-[acyl-carrier protein]:UDP-3-O-[(3R)-3-hydroxymyristoyl]-alpha-D-glucosamine N-acetyltransferase	C06022[c] + C04688[c] -> C00229[c] + C04652[c]	MCA2588	MCA2588	2.3.1.191	Lipopolysaccharide biosynthesis	0	0	1000	0		2.3.1.191
R04549	UDP-2,3-bis[(3R)-3-hydroxymyristoyl]-alpha-D-glucosamine 2,3-bis[(3R)-3-hydroxymyristoyl]-beta-D-glucosaminyl 1-phosphate phosphohydrolase	C00001[c] + C04652[c] -> C00105[c] + C04824[c]	MCA1318	MCA1318	3.6.1.54	Lipopolysaccharide biosynthesis	0	0	1000	0		3.6.1.54
R04544	(3R)-3-hydroxypalmitoyl-[acyl-carrier-protein] hydro-lyase	C04633[c] <=> C00001[c] + C05763[c]	MCA2878 or MCA2445	MCA2878,MCA2445	2.3.1.-, 4.2.1.59	Fatty acid biosynthesis	1	-1000	1000	0		2.3.1.-, 4.2.1.59
R04543	(3R)-3-Hydroxypalmitoyl-[acyl-carrier-protein]:NADP+ oxidoreductase	C00006[c] + C04633[c] <=> C00080[c] + C00005[c] + C05762[c]	MCA0927 or MCA2001	MCA0927,MCA2001	1.1.1.100, 2.3.1.-	Fatty acid biosynthesis	1	-1000	1000	0		1.1.1.100, 2.3.1.-
R04537	(3R)-3-Hydroxybutanoyl-[acyl-carrier-protein] hydro-lyase;	C04620[c] <=> C00001[c] + C05751[c]	MCA2878 or MCA2445	MCA2878,MCA2445	2.3.1.-, 4.2.1.59	Fatty acid biosynthesis	1	-1000	1000	0		2.3.1.-, 4.2.1.59
R04536	(3R)-3-Hydroxyoctanoyl-[acyl-carrier-protein]:NADP+ oxidoreductase	C00006[c] + C04620[c] <=> C00080[c] + C00005[c] + C05750[c]	MCA0927 or MCA2001	MCA0927,MCA2001	1.1.1.100, 2.3.1.-	Fatty acid biosynthesis	1	-1000	1000	0		1.1.1.100, 2.3.1.-
R04535	(3R)-3-Hydroxybutanoyl-[acyl-carrier-protein] hydro-lyase	C04619[c] <=> C00001[c] + C05754[c]	MCA2878 or MCA2445	MCA2878,MCA2445	2.3.1.-, 4.2.1.59	Fatty acid biosynthesis	1	-1000	1000	0		2.3.1.-, 4.2.1.59
R04534	(3R)-3-Hydroxydecanoyl-[acyl-carrier-protein]:NADP+ oxidoreductase	C00006[c] + C04619[c] <=> C00005[c] + C05753[c]	MCA0927 or MCA2001	MCA0927,MCA2001	1.1.1.100, 2.3.1.-	Fatty acid biosynthesis	1	-1000	1000	0		1.1.1.100, 2.3.1.-
R04533	(3R)-3-Hydroxybutanoyl-[acyl-carrier protein]:NADP+ oxidoreductase	C00006[c] + C04618[c] <=> C00080[c] + C00005[c] + C05744[c]	MCA0927 or MCA2001	MCA0927,MCA2001	1.1.1.100, 2.3.1.-	Fatty acid biosynthesis	1	-1000	1000	0		1.1.1.100, 2.3.1.-
R04509	ATP:4-amino-2-methyl-5-phosphomethylpyrimidine phosphotransferase	C00002[c] + C04556[c] -> C00008[c] + C04752[c]	MCA0629	MCA0629	2.7.4.7	Thiamine metabolism	0	0	1000	0		2.7.4.7
R04475	N-Succinyl-L-2,6-diaminoheptanedioate:2-oxoglutarate amino-transferase	C00026[c] + C04421[c] <=> C00025[c] + C04462[c]	MCA1491	MCA1491	2.6.1.17	Lysine biosynthesis	1	-1000	1000	0		2.6.1.17
R04463	5'-Phosphoribosylformylglycinamide:L-glutamine amido-ligase (ADP-forming)	C00001[c] + C00002[c] + C00064[c] + C04376[c] -> C00008[c] + C00009[c] + C00025[c] + C04640[c]	MCA0673	MCA0673	6.3.5.3	Purine metabolism	0	0	1000	0		6.3.5.3
R04457	5-amino-6-(D-ribitylamino)uracil butanedionetransferase	C15556[c] + C04732[c] -> C00009[c] + 2 C00001[c] + C04332[c]	MCA1655	MCA1655	2.5.1.78	Riboflavin metabolism	0	0	1000	0		2.5.1.78
R04441	(R)-2,3-Dihydroxy-3-methylbutanoate hydro-lyase	C04272[c] <=> C00001[c] + C00141[c]	MCA2082	MCA2082	4.2.1.9	Valine, leucine and isoleucine biosynthesis	1	-1000	1000	0		4.2.1.9
R04440	(R)-2,3-Dihydroxy-3-methylbutanoate:NADP+ oxidoreductase (isomerizing)	C00006[c] + C04272[c] <=> C00080[c] + C00005[c] + C04181[c]	MCA2272	MCA2272	1.1.1.86	Valine, leucine and isoleucine biosynthesis	1	-1000	1000	0		1.1.1.86
R04430	butyryl-[acp]:NADP+ trans-2-oxidoreductase	C00006[c] + C05745[c] <=> C00080[c] + C00005[c] + C04246[c]	MCA1263	MCA1263		Fatty acid biosynthesis	1	-1000	1000	0
R04429	butyryl-[acp]:NAD+ trans-2-oxidoreductase	C00003[c] + C05745[c] <=> C00080[c] + C00004[c] + C04246[c]	MCA1263	MCA1263	1.3.1.9, 2.3.1.-	Fatty acid biosynthesis	1	-1000	1000	0		1.3.1.9, 2.3.1.-
R04428	(3R)-3-Hydroxybutanoyl-[acyl-carrier-protein] hydro-lyase	C04618[c] <=> C00001[c] + C04246[c]	MCA2878 or MCA2445	MCA2878,MCA2445	2.3.1.-, 4.2.1.59	Fatty acid biosynthesis	1	-1000	1000	0		2.3.1.-, 4.2.1.59
R04426	(2R,3S)-3-isopropylmalate:NAD+ oxidoreductase	C00003[c] + C04411[c] <=> C00080[c] + C00004[c] + C04236[c]	MCA2063	MCA2063	1.1.1.85	Valine, leucine and isoleucine biosynthesis	1	-1000	1000	0		1.1.1.85
R04425	(2S,3R)-3-Hydroxybutane-1,2,3-tricarboxylate hydro-lyase	C04593[c] <=> C00001[c] + C04225[c]	MCA2485	MCA2485	4.2.1.99	Propanoate metabolism	1	-1000	1000	0		4.2.1.99
R04420	5-Methylthio-5-deoxy-D-ribose-1-phosphate ketol-isomerase	C04188[c] -> C04582[c]	MCA1974	MCA1974	5.3.1.23	Cysteine and methionine metabolism	0	0	1000	0		5.3.1.23
R04405	5-Methyltetrahydropteroyltri-L-glutamate:L-homocysteine S-methyltransferase	C04489[c] + C00155[c] -> C00073[c] + C04144[c]	MCA2260	MCA2260	2.1.1.14	Cysteine and methionine metabolism	0	0	1000	0		2.1.1.14
R04391	ATP:pantothenate 4'-phosphotransferase	C00002[c] + C04079[c] -> C00008[c] + C04352[c]	MCA1780	MCA1780	2.7.1.33	Pantothenate and CoA biosynthesis	0	0	1000	0		2.7.1.33
R04378	1-(5'-Phosphoribosyl)-5-amino-4-imidazolecarboxamide:pyrophosphate phosphoribosyltransferase	C00013[c] + C04677[c] <=> C00119[c] + C04051[c]	MCA0816	MCA0816	2.4.2.7	Purine metabolism	1	-1000	1000	0		2.4.2.7
R04365	Succinyl-CoA:2,3,4,5-tetrahydropyridine-2,6-dicarboxylate N-succinyltransferase	C00001[c] + C00091[c] + C03972[c] -> C00010[c] + C04462[c]	MCA1490	MCA1490	2.3.1.117	Lysine biosynthesis	0	0	1000	0		2.3.1.117
R04355	Acyl-[acyl-carrier-protein]:malonyl-[acyl-carrier-protein] C-acyltransferase (decarboxylating)	C01209[c] + C03939[c] -> C00011[c] + C05744[c] + C00229[c]	MCA0924 or MCA2879 or MCA1999	MCA0924,MCA2879,MCA1999	2.3.1.41, 2.3.1.179	Fatty acid biosynthesis	0	0	1000	0		2.3.1.41, 2.3.1.179
R04326		C00001[c] + C03838[c] + C00445[c] -> C00101[c] + C04376[c]	MCA2009	MCA2009	2.1.2.2	One carbon pool by folate	0	0	1000	0		2.1.2.2
R04325	10-Formyltetrahydrofolate:5'-phosphoribosylglycinamide formyltransferase	C00234[c] + C03838[c] -> C00101[c] + C04376[c]	MCA2009	MCA2009	2.1.2.2	Purine metabolism	0	0	1000	0		2.1.2.2
R04292	glycerone phosphate:iminosuccinate alkyltransferase (cyclizing)	C00111[c] + C05840[c] -> C00009[c] + 2 C00001[c] + C03722[c]	MCA0376	MCA0376	2.5.1.72	Nicotinate and nicotinamide metabolism	0	0	1000	0		2.5.1.72
R04286	2-amino-4-hydroxy-6-(erythro-1,2,3-trihydroxypropyl) dihydropteridine triphosphate lyase	C04895[c] -> C00536[c] + C03684[c]	MCA2527	MCA2527	4.2.3.12	Folate biosynthesis	0	0	1000	0		4.2.3.12
R04231	(R)-4'-Phosphopantothenate:L-cysteine ligase	C00063[c] + C00097[c] + C03492[c] -> C00013[c] + C00055[c] + C04352[c]	MCA2784	MCA2784	6.3.2.5	Pantothenate and CoA biosynthesis	0	0	1000	0		6.3.2.5
R04230	(R)-4'-Phosphopantothenate:L-cysteine ligase	C00002[c] + C00097[c] + C03492[c] -> C00013[c] + C00020[c] + C04352[c]	MCA2784	MCA2784	6.3.2.5	Pantothenate and CoA biosynthesis	0	0	1000	0		6.3.2.5
R04208	2-(Formamido)-N1-(5-phosphoribosyl)acetamidine cyclo-ligase (ADP-forming)	C00002[c] + C04640[c] -> C00008[c] + C00009[c] + C03373[c]	MCA0373	MCA0373	6.3.3.1	Purine metabolism	0	0	1000	0		6.3.3.1
R04199	2,3,4,5-tetrahydrodipicolinate:NADP+ 4-oxidoreductase	C00080[c] + C00005[c] + C20258[c] -> C00001[c] + C00006[c] + C03972[c]	MCA1854	MCA1854	1.17.1.8	Monobactam biosynthesis	0	0	1000	0		1.17.1.8
R04198	2,3,4,5-tetrahydrodipicolinate:NAD+ 4-oxidoreductase	C00080[c] + C00004[c] + C20258[c] -> C00001[c] + C00003[c] + C03972[c]	MCA1854	MCA1854	1.17.1.8	Monobactam biosynthesis	0	0	1000	0		1.17.1.8
R04173	3-Phosphoserine:2-oxoglutarate aminotransferase	C00026[c] + C01005[c] <=> C00025[c] + C03232[c]	MCA1420	MCA1420	2.6.1.52	Glycine, serine and threonine metabolism	1	-1000	1000	0		2.6.1.52
R04148	Nicotinate-nucleotide:dimethylbenzimidazole phospho-D-ribosyltransferase	C03114[c] + C01185[c] -> C00080[c] + C04778[c] + C00253[c]	MCA0463	MCA0463	2.4.2.21	Porphyrin and chlorophyll metabolism	0	0	1000	0		2.4.2.21
R04144	5-Phospho-D-ribosylamine:glycine ligase (ADP-forming)	C00002[c] + C00037[c] + C03090[c] -> C00008[c] + C00009[c] + C03838[c]	MCA0361	MCA0361	6.3.4.13	Purine metabolism	0	0	1000	0		6.3.4.13
R04037	1-(5-phospho-D-ribosyl)-AMP 1,6-hydrolase	C00001[c] + C02741[c] <=> C04896[c]	MCA2801	MCA2801	3.5.4.19	Histidine metabolism	1	-1000	1000	0		3.5.4.19
R04035	Phosphoribosyl-ATP pyrophosphohydrolase	C00001[c] + C02739[c] <=> C00013[c] + C02741[c]	MCA2800	MCA2800	3.6.1.31	Histidine metabolism	1	-1000	1000	0		3.6.1.31
R04001	3-Isopropylmalate hydro-lyase	C04411[c] <=> C00001[c] + C02631[c]	MCA2065 and MCA2064	MCA2065,MCA2064	4.2.1.33	Valine, leucine and isoleucine biosynthesis	1	-1000	1000	0		4.2.1.33
R03971	gamma-glutamyl-beta-aminopropiononitrile amidohydrolase	C00025[c] + C05670[c] -> C00001[c] + C06114[c]	MCA2148	MCA2148	2.3.2.2	Cyanoamino acid metabolism	0	0	1000	0		2.3.2.2
R03970	(5-glutamyl)-peptide:amino-acid 5-glutamyltransferase	C00025[c] + C02512[c] -> C00001[c] + C05711[c]	MCA2148	MCA2148	2.3.2.2	Cyanoamino acid metabolism	0	0	1000	0		2.3.2.2
R03968	2-Isopropylmalate hydro-lyase	C02504[c] <=> C00001[c] + C02631[c]	MCA2065 and MCA2064	MCA2065,MCA2064	4.2.1.33	Valine, leucine and isoleucine biosynthesis	1	-1000	1000	0		4.2.1.33
R03948	S-adenosyl-L-methionine:precorrin-4 C20-methyltransferase	C00019[c] + C02463[c] -> C00080[c] + C00021[c] + C05772[c]	MCA2295	MCA2295	2.1.1.130	Porphyrin and chlorophyll metabolism	0	0	1000	0		2.1.1.130
R03947	S-Adenosyl-L-methionine:uroporphyrin-III C-methyltransferase	C00003[c] + C02463[c] -> C00080[c] + C00004[c] + C05778[c]	MCA2089	MCA2089	1.3.1.76	Porphyrin and chlorophyll metabolism	0	0	1000	0		1.3.1.76
R03916	(5-glutamyl)-peptide:amino-acid 5-glutamyltransferase	C00001[c] + C02320[c] -> C00025[c] + C05729[c]	MCA2148	MCA2148	2.3.2.2	Glutathione metabolism	0	0	1000	0		2.3.2.2
R03898	2-methylmaleate hydratase;	C00001[c] + C02226[c] -> C06032[c]	MCA2065 and MCA2064	MCA2065,MCA2064	4.2.1.35	Valine, leucine and isoleucine biosynthesis	0	0	1000	0		4.2.1.35
R03896	(R)-2-Methylmalate hydro-lyase (2-methylmaleate-forming)	C02612[c] -> C00001[c] + C02226[c]	MCA2065 and MCA2064	MCA2065,MCA2064	4.2.1.35	Valine, leucine and isoleucine biosynthesis	0	0	1000	0		4.2.1.35
R03816	NADH:phylloquinone oxidoreductase	C00080[c] + C00004[c] + C02059[c] -> C00003[c] + C03313[c]	MCA2521	MCA2521	1.6.5.2	Ubiquinone and other terpenoid-quinone biosynthesis	0	0	1000	0		1.6.5.2
R03689	lanosterol delta24-reductase	C00080[c] + C00005[c] + C01724[c] <=> C00006[c] + C05109[c]	MCA1404	MCA1404	1.3.1.72	Steroid biosynthesis	1	-1000	1000	0		1.3.1.72
R03599	L-selenocysteine selenide-lyase (L-alanine-forming)	C00004[c] + C05688[c] -> C00003[c] + C00041[c] + C01528[c]	MCA0989	MCA0989	4.4.1.16	Selenocompound metabolism	0	0	1000	0		4.4.1.16
R03596	Hydrogen selenide:NADP+ oxidoreductase	5 C00080[c] + 3 C00005[c] + C05684[c] -> 3 C00001[c] + 3 C00006[c] + C01528[c]	MCA1694	MCA1694	1.8.1.9	Selenocompound metabolism	0	0	1000	0		1.8.1.9
R03562	Toluene,NADPH:oxogen oxidoreductase (3-hydroxylating)	C00080[c] + C00005[c] + C00007[c] + C01455[c] -> C00001[c] + C00006[c] + C01467[c]	MCA0225	MCA0225	1.14.13.-	Toluene degradation	0	0	1000	0		1.14.13.-
R03542	alpha-Aminopropiononitrile aminohydrolase	2 C00001[c] + C05714[c] -> C00014[c] + C01401[c]	MCA0381	MCA0381	3.5.5.1	Cyanoamino acid metabolism	0	0	1000	0		3.5.5.1
R03531	2'-Deoxyinosine-5'-triphosphate pyrophosphohydrolase;	C00001[c] + C01345[c] -> C00013[c] + C06196[c]	MCA3023	MCA3023	3.6.1.-	Purine metabolism	0	0	1000	0		3.6.1.-
R03530	ATP:dIDP phosphotransferase	C00002[c] + C01344[c] -> C00008[c] + C01345[c]	MCA2886	MCA2886	2.7.4.6	Purine metabolism	0	0	1000	0		2.7.4.6
R03509	N-(5-Phospho-beta-D-ribosyl)anthranilate ketol-isomerase	C04302[c] <=> C01302[c]	MCA2496	MCA2496	5.3.1.24	Phenylalanine, tyrosine and tryptophan biosynthesis	1	-1000	1000	0		5.3.1.24
R03508	1-(2-Carboxyphenylamino)-1-deoxy-D-ribulose-5-phosphate carboxy-lyase(cyclizing)	C01302[c] <=> C00001[c] + C00011[c] + C03506[c]	MCA2587	MCA2587	4.1.1.48	Phenylalanine, tyrosine and tryptophan biosynthesis	1	-1000	1000	0		4.1.1.48
R03504	2-amino-4-hydroxy-6-(D-erythro-1,2,3-trihydroxypropyl)-7,8-dihydropteridine glycolaldehyde-lyase	C04874[c] -> C01300[c] + C00266[c]	MCA2988	MCA2988	4.1.2.25	Folate biosynthesis	0	0	1000	0		4.1.2.25
R03503	ATP:2-amino-4-hydroxy-6-hydroxymethyl-7,8-dihydropteridine 6'-pyrophosphotransferase	C00002[c] + C01300[c] -> C00020[c] + C04807[c]	MCA2313 or MCA2987	MCA2313,MCA2987	2.7.6.3	Folate biosynthesis	0	0	1000	0		2.7.6.3
R03472	5-amino-1-(5-phospho-D-ribosyl)imidazole formate-lyase (decarboxylating, 4-amino-2-methyl-5-phosphomethylpyrimidine-forming)	C00019[c] + C03373[c] -> C05198[c] + C00073[c] + C00058[c] + C00237[c] + C04556[c]	MCA2710	MCA2710	4.1.99.17	Thiamine metabolism	0	0	1000	0		4.1.99.17
R03471	ATP:4-amino-5-hydroxymethyl-2-methylpyrimidine 5-phosphotransferase	C00002[c] + C01279[c] -> C00008[c] + C04556[c]	MCA0629	MCA0629	2.7.1.49	Thiamine metabolism	0	0	1000	0		2.7.1.49
R03464	5,10-Methenyltetrahydromethanopterin 10-hydrolase (decyclizing)	C00080[c] + C01274[c] <=> C00001[c] + C04330[c]	MCA2863	MCA2863	3.5.4.27	Methane metabolism	1	-1000	1000	0		3.5.4.27
R03460	Phosphoenolpyruvate:3-phosphoshikimate 5-O-(1-carboxyvinyl)-transferase	C00074[c] + C03175[c] <=> C00009[c] + C01269[c]	MCA1415	MCA1415	2.5.1.19	Phenylalanine, tyrosine and tryptophan biosynthesis	1	-1000	1000	0		2.5.1.19
R03459	2,5-Diamino-6-hydroxy-4-(5-phosphoribosylamino)-pyrimidine 2-aminohydrolase	C00001[c] + C01304[c] -> C00014[c] + C01268[c]	MCA1658	MCA1658	3.5.4.26	Riboflavin metabolism	0	0	1000	0		3.5.4.26
R03458	5-amino-6-(5-phosphoribitylamino)uracil:NADP+ 1'-oxidoreductase	C00080[c] + C00005[c] + C01268[c] -> C00006[c] + C04454[c]	MCA1658	MCA1658	1.1.1.193	Riboflavin metabolism	0	0	1000	0		1.1.1.193
R03457	D-erythro-1-(Imidazol-4-yl)glycerol 3-phosphate hydro-lyase	C04666[c] <=> C00001[c] + C01267[c]	MCA0354	MCA0354	4.2.1.19	Histidine metabolism	1	-1000	1000	0		4.2.1.19
R03443	N-acetyl-L-glutamate-5-semialdehyde:NADP+ 5-oxidoreductase (phosphrylating)	C00080[c] + C00005[c] + C04133[c] -> C00009[c] + C00006[c] + C01250[c]	MCA0700	MCA0700	1.2.1.38	Arginine biosynthesis	0	0	1000	0		1.2.1.38
R03424	S-adenosyl-L-methionine:phosphatidyl-N-methylethanolamine N-methyltransferase	C00019[c] + C01241[c] -> C00021[c] + C04308[c]	MCA3065	MCA3065		Glycerophospholipid metabolism	0	0	1000	0
R03409	guanosine 3'-diphosphate 5'-triphosphate 5'-phosphohydrolase	C00001[c] + C04494[c] <=> C00009[c] + C01228[c]	MCA2123	MCA2123	3.6.1.11	Purine metabolism	1	-1000	1000	0		3.6.1.11
R03390	Formylmethanofuran:5,6,7,8-tetrahydromethanopterin 5-formyltransferase	C01217[c] + C01001[c] -> C00862[c] + C01274[c]	MCA2858	MCA2858	2.3.1.101	Methane metabolism	0	0	1000	0		2.3.1.101
R03351	CTP:3-deoxy-D-manno-octulosonate cytidylyltransferase	C00063[c] + C01187[c] -> C00013[c] + C04121[c]	MCA0635	MCA0635	2.7.7.38	Lipopolysaccharide biosynthesis	0	0	1000	0		2.7.7.38
R03350	3-Deoxy-D-manno-octulosonate-8-phosphate 8-phosphohydrolase	C00001[c] + C04478[c] -> C00009[c] + C01187[c]	MCA0745	MCA0745	3.1.3.45	Lipopolysaccharide biosynthesis	0	0	1000	0		3.1.3.45
R03348	Nicotinate-nucleotide:pyrophosphate phosphoribosyltransferase (carboxylating)	C00119[c] + C03722[c] -> C00013[c] + C00011[c] + C01185[c]	MCA3101	MCA3101	2.4.2.19	Nicotinate and nicotinamide metabolism	0	0	1000	0		2.4.2.19
R03346	nicotinate D-ribonucleotide phosphohydrolase	C00001[c] + C01185[c] -> C00009[c] + C05841[c]	MCA0448 or MCA1322 or MCA2418 or MCA2982	MCA0448,MCA1322,MCA2418,MCA2982	3.1.3.5, 3.1.3.-	Nicotinate and nicotinamide metabolism	0	0	1000	0		3.1.3.5, 3.1.3.-
R03321	beta-D-Glucose 6-phosphate ketol-isomerase	C01172[c] <=> C05345[c]	MCA1247	MCA1247	5.3.1.9	Glycolysis / Gluconeogenesis	1	-1000	1000	0		5.3.1.9
R03313	L-glutamate-5-semialdehyde:NADP+ 5-oxidoreductase (phosphorylating)	C00080[c] + C00005[c] + C03287[c] -> C00009[c] + C01165[c] + C00006[c]	MCA1880	MCA1880	1.2.1.41	Arginine and proline metabolism	0	0	1000	0		1.2.1.41
R03293	trans-4-Hydroxy-L-proline:NADP+ 5-oxidoreductase	C00080[c] + C00005[c] + C04281[c] -> C00006[c] + C01157[c]	MCA1535	MCA1535	1.5.1.2	Arginine and proline metabolism	0	0	1000	0		1.5.1.2
R03291	trans-4-Hydroxy-L-proline:NAD+ 5-oxidoreductase	C00080[c] + C00004[c] + C04281[c] -> C00003[c] + C01157[c]	MCA1535	MCA1535	1.5.1.2	Arginine and proline metabolism	0	0	1000	0		1.5.1.2
R03269	N-[(R)-4'-Phosphopantothenoyl]-L-cysteine carboxy-lyase	C04352[c] -> C00011[c] + C01134[c]	MCA2784	MCA2784	4.1.1.36	Pantothenate and CoA biosynthesis	0	0	1000	0		4.1.1.36
R03254	phosphoenolpyruvate:D-arabinose-5-phosphate C-(1-carboxyvinyl)transferase (phosphate-hydrolysing, 2-carboxy-2-oxoethyl-forming);	C00001[c] + C00074[c] + C01112[c] -> C00009[c] + C04478[c]	MCA2514	MCA2514	2.5.1.55	Lipopolysaccharide biosynthesis	0	0	1000	0		2.5.1.55
R03243	5-Amino-2-oxopentanoate:2-oxoglutarate aminotransferase	C00026[c] + C01100[c] <=> C00025[c] + C01267[c]	MCA1113 or MCA1417	MCA1113,MCA1417	2.6.1.9	Histidine metabolism	1	-1000	1000	0		2.6.1.9
R03239	ITP:D-tagatose 6-phosphate 1-phosphotransferase	C00081[c] + C01097[c] <=> C03785[c] + C00104[c]	MCA1251	MCA1251	2.7.1.11	Galactose metabolism	1	-1000	1000	0		2.7.1.11
R03238	UTP:D-tagatose 6-phosphate 1-phosphotransferase	C00075[c] + C01097[c] <=> C00015[c] + C03785[c]	MCA1251	MCA1251	2.7.1.11	Galactose metabolism	1	-1000	1000	0		2.7.1.11
R03237	CTP:D-tagatose 6-phosphate 1-phosphotransferase	C00063[c] + C01097[c] <=> C03785[c] + C00112[c]	MCA1251	MCA1251	2.7.1.11	Galactose metabolism	1	-1000	1000	0		2.7.1.11
R03236	ATP:D-tagatose-6-phosphate 1-phosphotransferase	C00002[c] + C01097[c] -> C00008[c] + C03785[c]	MCA1251	MCA1251	2.7.1.11	Galactose metabolism	0	0	1000	0		2.7.1.11
R03231	S-Adenosyl-L-methionine:8-amino-7-oxononanoate aminotransferase	C00019[c] + C01092[c] -> C04425[c] + C01037[c]	MCA0017	MCA0017	2.6.1.62	Biotin metabolism	0	0	1000	0		2.6.1.62
R03223	2-methyl-4-amino-5-hydroxymethylpyrimidine-diphosphate:4-methyl-5-(2-phosphoethyl)-thiazole 2-methyl-4-aminopyridine-5-methenyltransferase	C04752[c] + C04327[c] -> C00013[c] + C01081[c]	MCA2999	MCA2999	2.5.1.3	Thiamine metabolism	0	0	1000	0		2.5.1.3
R03220	Coproporphyrinogen:oxygen oxidoreductase(decarboxylating)	C00007[c] + C03263[c] -> 2 C00001[c] + 2 C00011[c] + C01079[c]	MCA2791	MCA2791	1.3.3.3	Porphyrin and chlorophyll metabolism	0	0	1000	0		1.3.3.3
R03210	6-Carboxyhexanoyl-CoA:L-alanine C-carboxyhexanoyltransferase (decarboxylating)	C00041[c] + C01063[c] -> C00011[c] + C00010[c] + C01092[c]	MCA1126	MCA1126	2.3.1.47	Biotin metabolism	0	0	1000	0		2.3.1.47
R03199	(S)-2,3-Epoxysqualene mutase (cyclizing, lanosterol-forming)	C01054[c] -> C01724[c]			5.4.99.7	Steroid biosynthesis	0	0	1000	0		5.4.99.7
R03197	Uroporphyrinogen-III carboxy-lyase	C01051[c] -> 4 C00011[c] + C03263[c]	MCA0332	MCA0332	4.1.1.37	Porphyrin and chlorophyll metabolism	0	0	1000	0		4.1.1.37
R03194	S-adenosyl-L-methionine:uroporphyrin-III C-methyltransferase	2 C00019[c] + C01051[c] -> 2 C00021[c] + C02463[c]	MCA2089 or MCA3061	MCA2089,MCA3061	2.1.1.107	Porphyrin and chlorophyll metabolism	0	0	1000	0		2.1.1.107
R03193	UDP-N-acetylmuramate:L-alanine ligase (ADP-forming)	C00002[c] + C01050[c] + C00041[c] -> C00008[c] + C00009[c] + C01212[c]	MCA2428	MCA2428	6.3.2.8	D-Glutamine and D-glutamate metabolism	0	0	1000	0		6.3.2.8
R03192	UDP-N-acetylmuramate:NADP+ oxidoreductase	C00080[c] + C00005[c] + C04631[c] -> C00006[c] + C01050[c]	MCA2427	MCA2427	1.3.1.98	Amino sugar and nucleotide sugar metabolism	0	0	1000	0		1.3.1.98
R03191	UDP-N-acetylmuramate:NADP+ oxidoreductase	C00080[c] + C00004[c] + C04631[c] -> C00003[c] + C01050[c]	MCA2427	MCA2427	1.3.1.98	Amino sugar and nucleotide sugar metabolism	0	0	1000	0		1.3.1.98
R03182	7,8-Diaminononanoate:carbon-dioxide cyclo-ligase	C00011[c] + C00002[c] + C01037[c] -> C00008[c] + C00009[c] + C01909[c]	MCA1129	MCA1129	6.3.3.3	Biotin metabolism	0	0	1000	0		6.3.3.3
R03165	Hydroxymethylbilane hydro-lyase(cyclizing)	C01024[c] -> C00001[c] + C01051[c]	MCA3061	MCA3061	4.2.1.75	Porphyrin and chlorophyll metabolism	0	0	1000	0		4.2.1.75
R03140	D-Ribulose 1,5-bisphosphate oxygenase	C00007[c] + C01182[c] -> C00988[c] + C00197[c]	MCA2743 and MCA2744	MCA2743,MCA2744	4.1.1.39	Glyoxylate and dicarboxylate metabolism	0	0	1000	0		4.1.1.39
R03132	O3-acetyl-L-serine acetate-lyase (adding hydrogen sulfide)	C00320[c] + C00979[c] -> C00033[c] + C05824[c]	MCA1022 or MCA1899	MCA1022,MCA1899	2.5.1.47	Cysteine and methionine metabolism	0	0	1000	0		2.5.1.47
R03105	3-Mercaptopyruvate:cyanide sulfurtransferase	C00094[c] + C00957[c] -> C00022[c] + C00320[c]	MCA1555	MCA1555	2.8.1.2	Cysteine and methionine metabolism	0	0	1000	0		2.8.1.2
R03093	3-Indoleacetonitrile aminohydrolase	2 C00001[c] + C02938[c] -> C00014[c] + C00954[c]	MCA0381	MCA0381	3.5.5.1	Tryptophan metabolism	0	0	1000	0		3.5.5.1
R03084	3-Dehydroquinate hydro-lyase	C00944[c] <=> C00001[c] + C02637[c]	MCA1044	MCA1044	4.2.1.10	Phenylalanine, tyrosine and tryptophan biosynthesis	1	-1000	1000	0		4.2.1.10
R03083	2-Dehydro-3-deoxy-D-arabino-heptonate 7-phosphate phosphate-lyase (cyclyzing)	C04691[c] <=> C00009[c] + C00944[c]	MCA0331	MCA0331	4.2.3.4	Phenylalanine, tyrosine and tryptophan biosynthesis	1	-1000	1000	0		4.2.3.4
R03067	2-amino-4-hydroxy-6-hydroxymethyl-7,8-dihydropteridine-diphosphate:4-aminobenzoate 2-amino-4-hydroxydihydropteridine-6-methenyltransferase	C00568[c] + C04807[c] -> C00013[c] + C00921[c]	MCA2318	MCA2318	2.5.1.15	Folate biosynthesis	0	0	1000	0		2.5.1.15
R03066	2-amino-4-hydroxy-6-hydroxymethyl-7,8-dihydropteridine:4-aminobenzoate 2-amino-4-hydroxydihydropteridine-6-methenyltransferase	C00568[c] + C01300[c] -> C00001[c] + C00921[c]	MCA2317	MCA2317	2.5.1.15	Folate biosynthesis	0	0	1000	0		2.5.1.15
R03051	2,3-Dihydroxy-3-methylbutanoate:NADP+ oxidoreductase (isomerizing)	C00080[c] + C00005[c] + C00900[c] -> C00006[c] + C04039[c]	MCA2272	MCA2272	1.1.1.86	Pantothenate and CoA biosynthesis	0	0	1000	0		1.1.1.86
R03035	ATP:pantetheine-4'-phosphate adenylyltransferase	C00002[c] + C01134[c] -> C00013[c] + C00882[c]	MCA0066	MCA0066	2.7.7.3	Pantothenate and CoA biosynthesis	0	0	1000	0		2.7.7.3
R03024	4-Nitrophenyl phosphate phosphohydrolase	C00001[c] + C03360[c] -> C00009[c] + C00870[c]	MCA2221	MCA2221	3.1.3.1, 3.1.3.2	Aminobenzoate degradation	0	0	1000	0		3.1.3.1, 3.1.3.2
R03018	ATP:pantothenate 4'-phosphotransferase	C00002[c] + C00864[c] -> C00008[c] + C03492[c]	MCA1780	MCA1780	2.7.1.33	Pantothenate and CoA biosynthesis	0	0	1000	0		2.7.1.33
R03015	Formylmethanofuran:(acceptor) oxidoreductase	C00011[c] + C00004[c] + C00862[c] -> C00001[c] + C00003[c] + C01001[c]	(MCA2319 or MCA2859) and MCA2857 and MCA2860	MCA2319,MCA2859,MCA2857,MCA2860	1.2.99.5	Methane metabolism	0	0	1000	0		1.2.99.5
R03013	L-histidinol-phosphate phosphohydrolase	C00001[c] + C01100[c] <=> C00009[c] + C00860[c]			3.1.3.15	Histidine metabolism	1	-1000	1000	0		3.1.3.15
R03012	L-Histidinol:NAD+ oxidoreductase	C00003[c] + C00860[c] <=> C00080[c] + C00004[c] + C01929[c]	MCA1963	MCA1963	1.1.1.23	Histidine metabolism	1	-1000	1000	0		1.1.1.23
R03005	ATP:nicotinamide-nucleotide adenylyltransferase	C00002[c] + C01185[c] -> C00013[c] + C00857[c]	MCA1879	MCA1879	2.7.7.1, 2.7.7.18	Nicotinate and nicotinamide metabolism	0	0	1000	0		2.7.7.1, 2.7.7.18
R02999	NADPH:cyanocob(III)alamin oxidoreductase (cyanide-eliminating)	C00005[c] + C02823[c] -> C00006[c] + C00177[c] + C00853[c]			1.16.1.6	Porphyrin and chlorophyll metabolism	0	0	1000	0		1.16.1.6
R02985	amygdalin beta-glucosidase	C00001[c] + C08325[c] -> C00031[c] + C00844[c]	MCA1578	MCA1578	3.2.1.21	Cyanoamino acid metabolism	0	0	1000	0		3.2.1.21
R02971	ATP:pantothenate 4'-phosphotransferase	C00002[c] + C00831[c] -> C00008[c] + C01134[c]	MCA1780	MCA1780	2.7.1.33	Pantothenate and CoA biosynthesis	0	0	1000	0		2.7.1.33
R02964	NADH:menaquinone oxidoreductase	C00080[c] + C00004[c] + C00828[c] -> C00003[c] + C05819[c]	MCA2521	MCA2521	1.6.5.2	Ubiquinone and other terpenoid-quinone biosynthesis	0	0	1000	0		1.6.5.2
R02948	(S)-2-hydroxy-2-methyl-3-oxobutanoate carboxy-lyase	C06010[c] -> C00011[c] + C00810[c]	MCA1838	MCA1838	4.1.1.5	Butanoate metabolism	0	0	1000	0		4.1.1.5
R02922	Creatinine iminohydrolase	C00001[c] + C00791[c] -> C00014[c] + C02565[c]	MCA1307	MCA1307	3.5.4.1	Arginine and proline metabolism	0	0	1000	0		3.5.4.1
R02874	squalene,NADPH-hemoprotein:oxygen oxidoreductase (2,3-epoxidizing)	C00080[c] + C00005[c] + C00007[c] + C00751[c] -> C00001[c] + C00006[c] + C01054[c]			1.14.14.17	Steroid biosynthesis	0	0	1000	0		1.14.14.17
R02872	presqualene-diphosphate diphosphate-lyase (reducing, squalene-forming)	C00080[c] + C00005[c] + C03428[c] -> C00013[c] + C00006[c] + C00751[c]	MCA0813	MCA0813	2.5.1.21	Steroid biosynthesis	0	0	1000	0		2.5.1.21
R02869	S-adenosylmethioninamine:spermidine 3-aminopropyltransferase	C00315[c] + C01137[c] -> C00170[c] + C00750[c]	MCA1034 or MCA2046	MCA1034,MCA2046	2.5.1.16	Cysteine and methionine metabolism	0	0	1000	0		2.5.1.16
R02864	S-Adenosyl-L-methionine:uroporphyrin-III C-methyltransferase	C05778[c] + C14818[c] -> 2 C00080[c] + C00748[c]	MCA2089	MCA2089	4.99.1.4	Porphyrin and chlorophyll metabolism	0	0	1000	0		4.99.1.4
R02788	UDP-N-acetylmuramoyl-L-alanyl-D-glutamate:(L)-meso-2,6-diaminoheptanedioate gamma-ligase (ADP-forming);	C00002[c] + C00692[c] + C00680[c] -> C00008[c] + C00009[c] + C04877[c]	MCA2433	MCA2433	6.3.2.13	Lysine biosynthesis	0	0	1000	0		6.3.2.13
R02783	UDP-N-acetylmuramoyl-L-alanine:D-glutamate ligase(ADP-forming)	C00002[c] + C01212[c] + C00217[c] -> C00008[c] + C00009[c] + C00692[c]	MCA2431	MCA2431	6.3.2.9	D-Glutamine and D-glutamate metabolism	0	0	1000	0		6.3.2.9
R02777	dTDP-beta-L-rhamnose:NADP+ 4-oxidoreductase;	C00080[c] + C00005[c] + C00688[c] -> C00006[c] + C03319[c]	MCA1285	MCA1285	1.1.1.133	Streptomycin biosynthesis	0	0	1000	0		1.1.1.133
R02740	alpha-D-Glucose 6-phosphate ketol-isomerase	C00668[c] <=> C05345[c]	MCA1247	MCA1247	5.3.1.9	Glycolysis / Gluconeogenesis	1	-1000	1000	0		5.3.1.9
R02739	alpha-D-Glucose 6-phosphate ketol-isomerase	C00668[c] <=> C01172[c]	MCA1247	MCA1247	5.3.1.9	Glycolysis / Gluconeogenesis	1	-1000	1000	0		5.3.1.9
R02736	beta-D-glucose-6-phosphate:NADP+ 1-oxoreductase	C00006[c] + C01172[c] -> C00080[c] + C00005[c] + C01236[c]	MCA0025 or MCA2971	MCA0025,MCA2971	1.1.1.49	Pentose phosphate pathway	0	0	1000	0		1.1.1.49
R02735	LL-2,6-Diaminoheptanedioate 2-epimerase	C00666[c] <=> C00680[c]	MCA0859	MCA0859	5.1.1.7	Lysine biosynthesis	1	-1000	1000	0		5.1.1.7
R02734	N-Succinyl-LL-2,6-diaminoheptanedioate amidohydrolase	C00001[c] + C04421[c] -> C00666[c] + C00042[c]	MCA1553	MCA1553	3.5.1.18	Lysine biosynthesis	0	0	1000	0		3.5.1.18
R02722	L-serine hydro-lyase [adding 1-C-(indol-3-yl)glycerol 3-phosphate; L-tryptophan and glyceraldehyde-3-phosphate-forming]	C00065[c] + C03506[c] -> C00001[c] + C00118[c] + C00078[c]	MCA2494	MCA2494	4.2.1.20	Glycine, serine and threonine metabolism	0	0	1000	0		4.2.1.20
R02720	XTP pyrophosphohydrolase;	C00001[c] + C00700[c] -> C00013[c] + C00655[c]	MCA3023	MCA3023	3.6.1.-	Purine metabolism	0	0	1000	0		3.6.1.-
R02719	xanthosine 5'-phosphate phosphohydrolase	C00001[c] + C00655[c] -> C00009[c] + C01762[c]	MCA0448 or MCA1322 or MCA2418 or MCA2982	MCA0448,MCA1322,MCA2418,MCA2982	3.1.3.5	Purine metabolism	0	0	1000	0		3.1.3.5
R02649	ATP:N-acetyl-L-glutamate 5-phosphotransferase	C00002[c] + C00624[c] -> C00008[c] + C04133[c]	MCA2781	MCA2781	2.7.2.8	Arginine biosynthesis	0	0	1000	0		2.7.2.8
R02619	3-sulfino-L-alanine:2-oxoglutarate aminotransferase	C00026[c] + C00606[c] -> C00025[c] + C05527[c]	MCA2202	MCA2202	2.6.1.1	Cysteine and methionine metabolism	0	0	1000	0		2.6.1.1
R02568	D-fructose 1-phosphate D-glyceraldehyde-3-phosphate-lyase	C01094[c] <=> C00111[c] + C00577[c]	MCA3041 or MCA3047	MCA3041,MCA3047	4.1.2.13	Fructose and mannose metabolism	1	-1000	1000	0		4.1.2.13
R02558	(R)-Prunasin beta-D-glucohydrolase	C00001[c] + C00844[c] -> C00031[c] + C00561[c]	MCA1578	MCA1578	3.2.1.21	Cyanoamino acid metabolism	0	0	1000	0		3.2.1.21
R02550	toluene, ferredoxin:oxygen oxidoreductase;	C00007[c] + C00138[c] + C01455[c] -> C00001[c] + C00139[c] + C00556[c]	MCA0225	MCA0225	1.14.13.-	Toluene degradation	0	0	1000	0		1.14.13.-
R02539	Phenylacetate:CoA ligase	C00002[c] + C00010[c] + C07086[c] -> C00013[c] + C00020[c] + C00582[c]	MCA1132	MCA1132	6.2.1.30	Phenylalanine metabolism	0	0	1000	0		6.2.1.30
R02530	(R)-S-Lactoylglutathione methylglyoxal-lyase (isomerizing)	C03451[c] <=> C00051[c] + C00546[c]	MCA1648	MCA1648	4.4.1.5	Pyruvate metabolism	1	-1000	1000	0		4.4.1.5
R02484	deoxyuridine:orthophosphate 2-deoxy-D-ribosyltransferase;	C00009[c] + C00526[c] -> C00106[c] + C00672[c]	MCA1717	MCA1717	2.4.2.4	Pyrimidine metabolism	0	0	1000	0		2.4.2.4
R02473	(R)-Pantoate:beta-alanine ligase (AMP-forming)	C00002[c] + C00522[c] + C00099[c] -> C00013[c] + C00020[c] + C00864[c]	MCA2315	MCA2315	6.3.2.1	beta-Alanine metabolism	0	0	1000	0		6.3.2.1
R02472	(R)-Pantoate:NADP+ 2-oxidoreductase	C00006[c] + C00522[c] <=> C00080[c] + C00005[c] + C00966[c]	MCA2523	MCA2523	1.1.1.169	Pantothenate and CoA biosynthesis	1	-1000	1000	0		1.1.1.169
R02433	L-cysteate:2-oxoglutarate aminotransferase	C00026[c] + C00506[c] <=> C00025[c] + C05528[c]	MCA2202	MCA2202	2.6.1.1	Cysteine and methionine metabolism	1	-1000	1000	0		2.6.1.1
R02421		C00498[c] -> C00008[c] + C00080[c] + C00182[c]	MCA1476 or MCA2606	MCA1476,MCA2606	2.4.1.21	Starch and sucrose metabolism	0	0	1000	0		2.4.1.21
R02413	Shikimate:NADP+ 3-oxidoreductase	C00006[c] + C00493[c] <=> C00080[c] + C00005[c] + C02637[c]	MCA2794	MCA2794	1.1.1.25	Phenylalanine, tyrosine and tryptophan biosynthesis	1	-1000	1000	0		1.1.1.25
R02412	ATP:shikimate 3-phosphotransferase	C00002[c] + C00493[c] -> C00008[c] + C03175[c]	MCA0330	MCA0330	2.7.1.71	Phenylalanine, tyrosine and tryptophan biosynthesis	0	0	1000	0		2.7.1.71
R02408	L-Cystine L-Cysteine-lyase (deaminating)	C00001[c] + C00491[c] -> C00022[c] + C00014[c] + C01962[c]	MCA1021	MCA1021	4.4.1.8	Cysteine and methionine metabolism	0	0	1000	0		4.4.1.8
R02404	Itaconate:CoA ligase (ADP-forming)	C00002[c] + C00010[c] + C00490[c] -> C00008[c] + C00009[c] + C00531[c]	MCA0967 and MCA0968	MCA0967,MCA0968	6.2.1.5	C5-Branched dibasic acid metabolism	0	0	1000	0		6.2.1.5
R02401	glutarate-semialdehyde:NAD+ oxidoreductase	C00001[c] + C00003[c] + C03273[c] <=> C00080[c] + C00004[c] + C00489[c]	MCA1756	MCA1756	1.2.1.20	Lysine degradation	1	-1000	1000	0		1.2.1.20
R02340	(1S,2R)-1-C-(indol-3-yl)glycerol 3-phosphate D-glyceraldehyde-3-phosphate-lyase	C03506[c] <=> C00118[c] + C00463[c]	MCA2494	MCA2494	4.2.1.20	Phenylalanine, tyrosine and tryptophan biosynthesis	1	-1000	1000	0		4.2.1.20
R02331	ATP:dUDP phosphotransferase	C00002[c] + C01346[c] -> C00008[c] + C00460[c]	MCA2886	MCA2886	2.7.4.6	Pyrimidine metabolism	0	0	1000	0		2.7.4.6
R02328	dTTP:alpha-D-glucose-1-phosphate thymidylyltransferase	C00103[c] + C00459[c] -> C00013[c] + C00842[c]	MCA1283	MCA1283	2.7.7.24	Streptomycin biosynthesis	0	0	1000	0		2.7.7.24
R02326	ATP:dCDP phosphotransferase	C00002[c] + C00705[c] -> C00008[c] + C00458[c]	MCA2886	MCA2886	2.7.4.6	Pyrimidine metabolism	0	0	1000	0		2.7.4.6
R02325	dCTP aminohydrolase	C00001[c] + C00458[c] -> C00014[c] + C00460[c]	MCA0053	MCA0053	3.5.4.13	Pyrimidine metabolism	0	0	1000	0		3.5.4.13
R02323	nicotinamide ribonucleotide phosphohydrolase	C00001[c] + C00455[c] -> C00009[c] + C03150[c]	MCA0448 or MCA1322 or MCA2418 or MCA2982	MCA0448,MCA1322,MCA2418,MCA2982	3.1.3.5, 3.1.3.-	Nicotinate and nicotinamide metabolism	0	0	1000	0		3.1.3.5, 3.1.3.-
R02322	nicotinamide-D-ribonucleotide amidohydrolase	C00001[c] + C00455[c] <=> C00014[c] + C01185[c]	MCA0385	MCA0385	3.5.1.42	Nicotinate and nicotinamide metabolism	1	-1000	1000	0		3.5.1.42
R02301	5-Formyltetrahydrofolate cyclo-ligase (ADP-forming)	C00080[c] + C00002[c] + C03479[c] -> C00008[c] + C00009[c] + C00445[c]	MCA2773	MCA2773	6.3.3.2	One carbon pool by folate	0	0	1000	0		6.3.3.2
R02300	S-Aminomethyldihydrolipoylprotein:(6S)-tetrahydrofolate aminomethyltransferase (ammonia-forming)	C00001[c] + C00445[c] -> C03479[c]	MCA0350	MCA0350	2.1.2.10	One carbon pool by folate	0	0	1000	0		2.1.2.10
R02291	L-Aspartate-4-semialdehyde:NADP+ oxidoreductase (phosphorylating)	C00080[c] + C00005[c] + C03082[c] -> C00009[c] + C00006[c] + C00441[c]	MCA2062	MCA2062	1.2.1.11	Glycine, serine and threonine metabolism	0	0	1000	0		1.2.1.11
R02283	N2-Acetyl-L-ornithine:2-oxoglutarate aminotransferase	C00025[c] + C01250[c] -> C00026[c] + C00437[c]	MCA2079	MCA2079	2.6.1.11	Arginine biosynthesis	0	0	1000	0		2.6.1.11
R02282	N2-Acetyl-L-ornithine:L-glutamate N-acetyltransferase	C00025[c] + C00437[c] <=> C00624[c] + C00077[c]	MCA1679	MCA1679	2.3.1.35	Arginine biosynthesis	1	-1000	1000	0		2.3.1.35
R02272	(S)-4-Amino-5-oxopentanoate 4,5-aminomutase	C03741[c] -> C00430[c]	MCA0054	MCA0054	5.4.3.8	Porphyrin and chlorophyll metabolism	0	0	1000	0		5.4.3.8
R02241	acyl-CoA:1-acyl-sn-glycerol-3-phosphate 2-O-acyltransferase	C00681[c] + C00040[c] -> C00010[c] + C00416[c]	MCA0058 or MCA2052	MCA0058,MCA2052	2.3.1.51	Glycerolipid metabolism	0	0	1000	0		2.3.1.51
R02240	ATP:1,2-diacylglycerol 3-phosphotransferase	C00002[c] + C00641[c] -> C00008[c] + C00416[c]	MCA2048	MCA2048	2.7.1.107	Glycerolipid metabolism	0	0	1000	0		2.7.1.107
R02237	7,8-dihydropteroate:L-glutamate ligase (ADP-forming)	C00002[c] + C00025[c] + C00921[c] -> C00008[c] + C00009[c] + C00415[c]	MCA2492	MCA2492	6.3.2.17	Folate biosynthesis	0	0	1000	0		6.3.2.17
R02236	dihydrofolate:NADP+ oxidoreductase	C00006[c] + C00415[c] <=> C00080[c] + C00005[c] + C00504[c]	MCA2729	MCA2729	1.5.1.3	One carbon pool by folate	1	-1000	1000	0		1.5.1.3
R02235	dihydrofolate:NAD+ oxidoreductase	C00003[c] + C00415[c] <=> C00080[c] + C00004[c] + C00504[c]	MCA2729	MCA2729	1.5.1.3	One carbon pool by folate	1	-1000	1000	0		1.5.1.3
R02199	L-Isoleucine:2-oxoglutarate aminotransferase	C00025[c] + C00671[c] <=> C00026[c] + C00407[c]	MCA2344	MCA2344	2.6.1.42	Valine, leucine and isoleucine degradation	1	-1000	1000	0		2.6.1.42
R02164	succinate:quinone oxidoreductase	C15602[c] + C00042[c] -> C15603[c] + C00122[c]	MCA1542 and MCA1548 and MCA1549 and MCA1550	MCA1542,MCA1548,MCA1549,MCA1550	1.3.5.1	Citrate cycle (TCA cycle)	0	0	1000	0		1.3.5.1
R02161	Ubiquinol:ferricytochrome-c oxidoreductase	2 C00125[c] + C00390[c] <=> 2 C00080[c] + 2 C00126[c] + C00399[c]	MCA1962	MCA1962	1.10.2.2	Oxidative phosphorylation	1	-1000	1000	0		1.10.2.2
R02142	XMP:pyrophosphate phosphoribosyltransferase	C00013[c] + C00655[c] <=> C00119[c] + C00385[c]	MCA1985	MCA1985	2.4.2.8, 2.4.2.22	Purine metabolism	1	-1000	1000	0		2.4.2.8, 2.4.2.22
R02111	1,4-alpha-D-Glucan:orthophosphate alpha-D-glucosyltransferase	C00369[c] + C00009[c] -> C00103[c] + C00718[c]	MCA0067 or MCA2540	MCA0067,MCA2540	2.4.1.1	Starch and sucrose metabolism	0	0	1000	0		2.4.1.1
R02102	2'-deoxyuridine 5'-monophosphate phosphohydrolase	C00001[c] + C00365[c] -> C00009[c] + C00526[c]	MCA0448 or MCA1322 or MCA2418 or MCA2982	MCA0448,MCA1322,MCA2418,MCA2982	3.1.3.5, 3.1.3.89	Pyrimidine metabolism	0	0	1000	0		3.1.3.5, 3.1.3.89
R02101	5,10-Methylenetetrahydrofolate:dUMP C-methyltransferase	C00143[c] + C00365[c] -> C00415[c] + C00364[c]	MCA2728	MCA2728	2.1.1.45	Pyrimidine metabolism	0	0	1000	0		2.1.1.45
R02100	dUTP nucleotidohydrolase	C00001[c] + C00460[c] -> C00013[c] + C00365[c]	MCA2783	MCA2783	3.6.1.23, 3.6.1.-	Pyrimidine metabolism	0	0	1000	0		3.6.1.23, 3.6.1.-
R02098	ATP:dUMP phosphotransferase	C00002[c] + C00365[c] -> C00008[c] + C01346[c]	MCA1996	MCA1996	2.7.4.9	Pyrimidine metabolism	0	0	1000	0		2.7.4.9
R02094	ATP:dTMP phosphotransferase	C00002[c] + C00364[c] -> C00008[c] + C00363[c]	MCA1996	MCA1996	2.7.4.9	Pyrimidine metabolism	0	0	1000	0		2.7.4.9
R02093	ATP:dTDP phosphotransferase	C00002[c] + C00363[c] -> C00008[c] + C00459[c]	MCA2886	MCA2886	2.7.4.6	Pyrimidine metabolism	0	0	1000	0		2.7.4.6
R02090	ATP:dGMP phosphotransferase	C00002[c] + C00362[c] -> C00008[c] + C00361[c]	MCA2975	MCA2975	2.7.4.8	Purine metabolism	0	0	1000	0		2.7.4.8
R02088	2'-deoxyadenosine 5'-monophosphate phosphohydrolase	C00001[c] + C00360[c] <=> C00009[c] + C00559[c]	MCA0448 or MCA1322 or MCA2418 or MCA2982	MCA0448,MCA1322,MCA2418,MCA2982	3.1.3.5, 3.1.3.89	Purine metabolism	1	-1000	1000	0		3.1.3.5, 3.1.3.89
R02060	D-Glucosamine 1-phosphate 1,6-phosphomutase;	C06156[c] <=> C00352[c]	MCA1847	MCA1847	5.4.2.10	Amino sugar and nucleotide sugar metabolism	1	-1000	1000	0		5.4.2.10
R02056	S-adenosyl-L-methionine:phosphatidylethanolamine N-methyltransferase	C00019[c] + C00350[c] -> C00021[c] + C01241[c]	MCA3065	MCA3065	2.1.1.17	Glycerophospholipid metabolism	0	0	1000	0		2.1.1.17
R02055	Phsophatidyl-L-serine carboxy-lyase	C02737[c] -> C00011[c] + C00350[c]	MCA1409	MCA1409	4.1.1.65	Glycerophospholipid metabolism	0	0	1000	0		4.1.1.65
R02036	6-Phospho-D-gluconate hydro-lyase(2-dehydro-3-deoxy-6-phospho-D-gluconate-forming)	C00345[c] -> C00001[c] + C04442[c]	MCA0037	MCA0037	4.2.1.12	Pentose phosphate pathway	0	0	1000	0		4.2.1.12
R02035	6-Phospho-D-glucono-1,5-lactone lactonohydrolase	C00001[c] + C01236[c] -> C00345[c]	MCA0024 or MCA2970	MCA0024,MCA2970	3.1.1.31	Pentose phosphate pathway	0	0	1000	0		3.1.1.31
R02030	CDP-diacylglycerol:phosphatidylglycerol 3-phosphatidyltransferase	C00344[c] + C00269[c] -> C00055[c] + C05980[c]	MCA0372	MCA0372	2.7.8.41	Glycerophospholipid metabolism	0	0	1000	0		2.7.8.41
R02029	Phosphatidylglycerophosphate phosphohydrolase	C00001[c] + C03892[c] -> C00009[c] + C00344[c]	MCA1652	MCA1652	3.1.3.27	Glycerophospholipid metabolism	0	0	1000	0		3.1.3.27
R02024	2'-Deoxycytidine diphosphate:oxidized-thioredoxin 2'-oxidoreductase	C00112[c] + C00342[c] -> C00001[c] + C00705[c] + C00343[c]	(MCA1634 or MCA2543) and MCA1637	MCA1634,MCA2543,MCA1637	1.17.4.1	Pyrimidine metabolism	0	0	1000	0		1.17.4.1
R02021	adenosine 3',5'-bisphosphate,sulfite:oxidized-thioredoxin oxidoreductase (3'-phosphoadenosine-5'-phosphosulfate -forming)	C00342[c] + C00053[c] -> C00094[c] + C00343[c] + C00054[c]	MCA2468	MCA2468	1.8.4.8	Sulfur metabolism	0	0	1000	0		1.8.4.8
R02019	2'-Deoxyguanosine 5'-diphosphate:oxidized-thioredoxin 2'-oxidoreductase	C00035[c] + C00342[c] -> C00001[c] + C00361[c] + C00343[c]	(MCA1634 or MCA2543) and MCA1637	MCA1634,MCA2543,MCA1637	1.17.4.1	Purine metabolism	0	0	1000	0		1.17.4.1
R02018	2'-Deoxyuridine 5'-diphosphate:oxidized-thioredoxin 2'-oxidoreductase	C00015[c] + C00342[c] -> C00001[c] + C01346[c] + C00343[c]	(MCA1634 or MCA2543) and MCA1637	MCA1634,MCA2543,MCA1637	1.17.4.1	Pyrimidine metabolism	0	0	1000	0		1.17.4.1
R02017	2'-Deoxyadenosine 5'-diphosphate:oxidized-thioredoxin 2'-oxidoreductase	C00008[c] + C00342[c] -> C00001[c] + C00343[c] + C00206[c]	(MCA1634 or MCA2543) and MCA1637	MCA1634,MCA2543,MCA1637	1.17.4.1	Purine metabolism	0	0	1000	0		1.17.4.1
R02016	NADPH:oxidized-thioredoxin oxidoreductase	C00080[c] + C00005[c] + C00343[c] -> C00006[c] + C00342[c]	MCA1694	MCA1694	1.8.1.9	Pyrimidine metabolism	0	0	1000	0		1.8.1.9
R02003	Geranyl-diphosphate:isopentenyl-diphosphate geranyltrans-transferase	C00129[c] + C00341[c] -> C00013[c] + C00448[c]	MCA0818	MCA0818	2.5.1.10	Terpenoid backbone biosynthesis	0	0	1000	0		2.5.1.10
R01993	(S)-dihydroorotate amidohydrolase	C00001[c] + C00337[c] <=> C00438[c]	MCA2075 or MCA2332	MCA2075,MCA2332	3.5.2.3	Pyrimidine metabolism	1	-1000	1000	0		3.5.2.3
R01974	3-(indol-3-yl)pyruvate carboxy-lyase [(2-indol-3-yl)acetaldehyde-forming]	C00331[c] -> C00011[c] + C00637[c]	MCA0996	MCA0996	4.1.1.74	Tryptophan metabolism	0	0	1000	0		4.1.1.74
R01968	2'-deoxyguanosine 5'-monophosphate phosphohydrolase	C00001[c] + C00362[c] <=> C00009[c] + C00330[c]	MCA0448 or MCA1322 or MCA2418 or MCA2982	MCA0448,MCA1322,MCA2418,MCA2982	3.1.3.5, 3.1.3.89	Purine metabolism	1	-1000	1000	0		3.1.3.5, 3.1.3.89
R01954	L-Citrulline:L-aspartate ligase (AMP-forming)	C00002[c] + C00327[c] + C00049[c] -> C00013[c] + C00020[c] + C03406[c]	MCA1099	MCA1099	6.3.4.5	Arginine biosynthesis	0	0	1000	0		6.3.4.5
R01933	2-oxoadipate dehydrogenase complex	C00003[c] + C00010[c] + C00322[c] -> C00080[c] + C00011[c] + C00004[c] + C00527[c]	MCA1952	MCA1952	1.2.4.2, 1.8.1.4, 2.3.1.61	Tryptophan metabolism	0	0	1000	0		1.2.4.2, 1.8.1.4, 2.3.1.61
R01931	thiosulfate:cyanide sulfurtranserase	C00320[c] + C00177[c] -> C00094[c] + C01755[c]	MCA1555	MCA1555	2.8.1.1	Sulfur metabolism	0	0	1000	0		2.8.1.1
R01920	S-adenosylmethioninamine:putrescine 3-aminopropyltransferase	C01137[c] + C00134[c] -> C00170[c] + C00315[c]	MCA1034 or MCA2046	MCA1034,MCA2046	2.5.1.16	Cysteine and methionine metabolism	0	0	1000	0		2.5.1.16
R01900	isocitrate hydro-lyase (cis-aconitate-forming)	C00311[c] <=> C00001[c] + C00417[c]	MCA2485	MCA2485	4.2.1.3	Citrate cycle (TCA cycle)	1	-1000	1000	0		4.2.1.3
R01887	gamma-Amino-gamma-cyanobutanoate aminohydrolase	2 C00001[c] + C05715[c] -> C00014[c] + C00302[c]	MCA0381	MCA0381	3.5.5.1	Cyanoamino acid metabolism	0	0	1000	0		3.5.5.1
R01870	Orotidine-5'-phosphate:diphosphate phospho-alpha-D-ribosyl-transferase	C00013[c] + C01103[c] <=> C00119[c] + C00295[c]	MCA2740	MCA2740	2.4.2.10	Pyrimidine metabolism	1	-1000	1000	0		2.4.2.10
R01868	(S)-dihydroorotate:quinone oxidoreductase	C15602[c] + C00337[c] <=> C15603[c] + C00295[c]	MCA1242	MCA1242	1.3.5.2	Pyrimidine metabolism	1	-1000	1000	0		1.3.5.2
R01867	(S)-dihydroorotate:fumarate oxidoreductase	C00122[c] + C00337[c] <=> C00042[c] + C00295[c]	MCA0768	MCA0768	1.3.98.1	Pyrimidine metabolism	1	-1000	1000	0		1.3.98.1
R01858	dGTP:pyruvate 2-O-phosphotransferase	C00074[c] + C00361[c] -> C00022[c] + C00286[c]	MCA2597	MCA2597	2.7.1.40	Purine metabolism	0	0	1000	0		2.7.1.40
R01857	ATP:dGDP phosphotransferase	C00002[c] + C00361[c] -> C00008[c] + C00286[c]	MCA2886	MCA2886	2.7.4.6	Purine metabolism	0	0	1000	0		2.7.4.6
R01830	beta-D-Fructose 6-phosphate:D-glyceraldehyde-3-phosphate glycolaldehyde transferase	C05345[c] + C00118[c] <=> C00279[c] + C00231[c]	MCA3040 or MCA3046	MCA3040,MCA3046	2.2.1.1	Pentose phosphate pathway	1	-1000	1000	0		2.2.1.1
R01827	sedoheptulose-7-phosphate:D-glyceraldehyde-3-phosphate glyceronetransferase	C05382[c] + C00118[c] <=> C05345[c] + C00279[c]	MCA3045	MCA3045	2.2.1.2	Pentose phosphate pathway	1	-1000	1000	0		2.2.1.2
R01826	Phosphoenolpyruvate:D-erythrose-4-phosphate C-(1-carboxyvinyl)transferase (phosphate hydrolysing, 2-carboxy-2-oxoethyl-forming)	C00001[c] + C00279[c] + C00074[c] <=> C00009[c] + C04691[c]	MCA1076	MCA1076	2.5.1.54	Phenylalanine, tyrosine and tryptophan biosynthesis	1	-1000	1000	0		2.5.1.54
R01819	D-mannose-6-phosphate aldose-ketose-isomerase	C00275[c] <=> C05345[c]	MCA2033	MCA2033	5.3.1.8	Fructose and mannose metabolism	1	-1000	1000	0		5.3.1.8
R01818	D-mannose 6-phosphate 1,6-phosphomutase	C00275[c] <=> C00636[c]	MCA2782	MCA2782	5.4.2.8	Fructose and mannose metabolism	1	-1000	1000	0		5.4.2.8
R01801	CDP-diacylglycerol:sn-glycerol-3-phosphate 3-phosphatidyltransferase	C00093[c] + C00269[c] -> C00055[c] + C03892[c]	MCA1682	MCA1682	2.7.8.5	Glycerophospholipid metabolism	0	0	1000	0		2.7.8.5
R01800	CDP-diacylglycerol:L-serine 3-phosphatidyltransferase	C00065[c] + C00269[c] -> C00055[c] + C02737[c]	MCA2273	MCA2273	2.7.8.8	Glycine, serine and threonine metabolism	0	0	1000	0		2.7.8.8
R01799	CTP:phosphatidate cytidyltransferase	C00063[c] + C00416[c] -> C00013[c] + C00269[c]	MCA0572	MCA0572	2.7.7.41	Glycerophospholipid metabolism	0	0	1000	0		2.7.7.41
R01786	ATP:alpha-D-glucose 6-phosphotransferase	C00002[c] + C00267[c] <=> C00008[c] + C00668[c]	MCA0561	MCA0561	2.7.1.2	Glycolysis / Gluconeogenesis	1	-1000	1000	0		2.7.1.2
R01777	Succinyl-CoA:L-homoserine O-succinyltransferase	C00091[c] + C00263[c] -> C00010[c] + C01118[c]	MCA1876	MCA1876	2.3.1.46	Cysteine and methionine metabolism	0	0	1000	0		2.3.1.46
R01775	L-homoserine:NADP+ oxidoreductase	C00006[c] + C00263[c] <=> C00080[c] + C00005[c] + C00441[c]	MCA0597	MCA0597	1.1.1.3	Glycine, serine and threonine metabolism	1	-1000	1000	0		1.1.1.3
R01773	L-Homoserine:NAD+ oxidoreductase	C00003[c] + C00263[c] <=> C00080[c] + C00004[c] + C00441[c]	MCA0597	MCA0597	1.1.1.3	Glycine, serine and threonine metabolism	1	-1000	1000	0		1.1.1.3
R01771	ATP:L-homoserine O-phosphotransferase	C00002[c] + C00263[c] -> C00008[c] + C01102[c]			2.7.1.39	Glycine, serine and threonine metabolism	0	0	1000	0		2.7.1.39
R01736	(R)-S-Lactoylglutathione hydrolase	C00001[c] + C03451[c] -> C00051[c] + C00256[c]	MCA0343	MCA0343	3.1.2.6	Pyruvate metabolism	0	0	1000	0		3.1.2.6
R01728	Prephenate:NAD+ oxidoreductase(decarboxylating)	C00003[c] + C00254[c] <=> C00080[c] + C00011[c] + C00004[c] + C01179[c]	MCA1416	MCA1416	1.3.1.12	Phenylalanine, tyrosine and tryptophan biosynthesis	1	-1000	1000	0		1.3.1.12
R01724	5-phospho-alpha-D-ribose 1-diphosphate:nicotinate ligase (ADP, diphosphate-forming)	C00008[c] + C00009[c] + C00013[c] + C01185[c] <=> C00001[c] + C00080[c] + C00002[c] + C00119[c] + C00253[c]	MCA2760	MCA2760	6.3.4.21	Nicotinate and nicotinamide metabolism	1	-1000	1000	0		6.3.4.21
R01716	chorismate:L-glutamine aminotransferase	C00064[c] + C00251[c] -> C00025[c] + C11355[c]	MCA2870	MCA2870	2.6.1.85	Folate biosynthesis	0	0	1000	0		2.6.1.85
R01715	Chorismate pyruvatemutase	C00251[c] <=> C00254[c]	MCA1418	MCA1418	5.4.99.5	Phenylalanine, tyrosine and tryptophan biosynthesis	1	-1000	1000	0		5.4.99.5
R01714	5-O-(1-Carboxyvinyl)-3-phosphoshikimate phosphate-lyase (chorismate-forming)	C01269[c] <=> C00009[c] + C00251[c]	MCA0702	MCA0702	4.2.3.5	Phenylalanine, tyrosine and tryptophan biosynthesis	1	-1000	1000	0		4.2.3.5
R01706	hexadecanoyl-[acyl-carrier protein] hydrolase	C00001[c] + C05764[c] -> C00249[c] + C00229[c]				Fatty acid biosynthesis	0	0	1000	0
R01698	Dihydrolipoamide:NAD+ oxidoreductase	C00003[c] + C00579[c] -> C00080[c] + C00004[c] + C00248[c]	MCA3002	MCA3002	1.8.1.4	Glycolysis / Gluconeogenesis	0	0	1000	0		1.8.1.4
R01665	ATP:dCMP phosphotransferase	C00002[c] + C00239[c] -> C00008[c] + C00705[c]	MCA1414	MCA1414	2.7.4.25	Pyrimidine metabolism	0	0	1000	0		2.7.4.25
R01664	2'-deoxycytidine 5'-monophosphate phosphohydrolase	C00001[c] + C00239[c] -> C00009[c] + C00881[c]	MCA0448 or MCA1322 or MCA2418 or MCA2982	MCA0448,MCA1322,MCA2418,MCA2982	3.1.3.5, 3.1.3.89	Pyrimidine metabolism	0	0	1000	0		3.1.3.5, 3.1.3.89
R01658	Dimethylallyl-diphosphate:isopentenyl-diphosphate dimethylallyltranstransferase	C00129[c] + C00235[c] -> C00013[c] + C00341[c]	MCA0818	MCA0818	2.5.1.1	Terpenoid backbone biosynthesis	0	0	1000	0		2.5.1.1
R01655	5,10-Methenyltetrahydrofolate 5-hydrolase (decyclizing)	C00001[c] + C00445[c] <=> C00080[c] + C00234[c]			3.5.4.9	One carbon pool by folate	1	-1000	1000	0		3.5.4.9
R01654	10-Formyltetrahydrofolate:L-glutamate ligase (ADP-forming)	C00002[c] + C00025[c] + C00234[c] -> C00008[c] + C00009[c] + C05928[c]	MCA2492	MCA2492	6.3.2.17	Folate biosynthesis	0	0	1000	0		6.3.2.17
R01652		C04236[c] -> C00011[c] + C00233[c]	MCA2063	MCA2063	1.1.1.85	Valine, leucine and isoleucine biosynthesis	0	0	1000	0		1.1.1.85
R01641	sedoheptulose-7-phosphate:D-glyceraldehyde-3-phosphate glycolaldehyde transferase	C05382[c] + C00118[c] <=> C00231[c] + C00117[c]	MCA3040 or MCA3046	MCA3040,MCA3046	2.2.1.1	Calvin Cycle	1	-1000	1000	0		2.2.1.1
R01626	Malonyl-CoA:[acyl-carrier-protein] S-malonyltransferase	C00229[c] + C00083[c] <=> C00010[c] + C01209[c]	MCA2002	MCA2002	2.3.1.39, 2.3.1.-	Fatty acid biosynthesis	1	-1000	1000	0		2.3.1.39, 2.3.1.-
R01621	D-xylulose 5-phosphate D-glyceraldehyde-3-phosphate-lyase (adding phosphate; acetyl-phosphate-forming)	C00009[c] + C00231[c] -> C00001[c] + C00118[c] + C00227[c]	MCA1587	MCA1587	4.1.2.9	Pentose phosphate pathway	0	0	1000	0		4.1.2.9
R01600	ATP:beta-D-glucose 6-phosphotransferase	C00002[c] + C00221[c] -> C00008[c] + C01172[c]	MCA0561	MCA0561	2.7.1.2	Glycolysis / Gluconeogenesis	0	0	1000	0		2.7.1.2
R01582	D-Phenylalanine:2-oxoglutarate aminotransferase	C00026[c] + C02265[c] <=> C00217[c] + C00166[c]	MCA0106	MCA0106	2.6.1.21	Phenylalanine metabolism	1	-1000	1000	0		2.6.1.21
R01570	thymidine:phosphate deoxy-alpha-D-ribosyltransferase	C00009[c] + C00214[c] -> C00672[c] + C00178[c]	MCA1717	MCA1717	2.4.2.4	Pyrimidine metabolism	0	0	1000	0		2.4.2.4
R01569	thymidylate 5'-phosphohydrolase	C00001[c] + C00364[c] <=> C00009[c] + C00214[c]	MCA0448 or MCA1322 or MCA2418 or MCA2982	MCA0448,MCA1322,MCA2418,MCA2982	3.1.3.5, 3.1.3.89	Pyrimidine metabolism	1	-1000	1000	0		3.1.3.5, 3.1.3.89
R01547	ATP:dAMP phosphotransferase	C00002[c] + C00360[c] -> C00008[c] + C00206[c]	MCA2066	MCA2066	2.7.4.3	Purine metabolism	0	0	1000	0		2.7.4.3
R01530	D-arabinose-5-phosphate aldose-ketose-isomerase	C01112[c] <=> C00199[c]	MCA0746	MCA0746	5.3.1.13	Lipopolysaccharide biosynthesis	1	-1000	1000	0		5.3.1.13
R01529	D-Ribulose-5-phosphate 3-epimerase	C00199[c] <=> C00231[c]	MCA2582	MCA2582	5.1.3.1	Pentose phosphate pathway	1	-1000	1000	0		5.1.3.1
R01528	6-phospho-D-gluconate:NADP+ 2-oxidoreductase (decarboxylating)	C00006[c] + C00345[c] -> C00080[c] + C00005[c] + C00011[c] + C00199[c]	MCA1950	MCA1950	1.1.1.44	Pentose phosphate pathway	0	0	1000	0		1.1.1.44
R01518	D-phosphoglycerate 2,3-phosphomutase	C00631[c] <=> C00197[c]	MCA0753	MCA0753	5.4.2.12	Glycolysis / Gluconeogenesis	1	-1000	1000	0		5.4.2.12
R01514	ATP:(R)-glycerate 3-phosphotransferase	C00002[c] + C00258[c] <=> C00008[c] + C00197[c]	MCA1408	MCA1408	2.7.1.31	Glycine, serine and threonine metabolism	1	-1000	1000	0		2.7.1.31
R01512	ATP:3-phospho-D-glycerate 1-phosphotransferase	C00002[c] + C00197[c] <=> C00008[c] + C00236[c]	MCA2021	MCA2021	2.7.2.3	Calvin Cycle	1	-1000	1000	0		2.7.2.3
R01492	ATP:cob(I)alamin Co-beta-adenosyltransferase	C00002[c] + C00853[c] -> C00536[c] + C00194[c]	MCA1814 or MCA2291	MCA1814,MCA2291	2.5.1.17	Porphyrin and chlorophyll metabolism	0	0	1000	0		2.5.1.17
R01470	sn-Glycero-3-phosphoethanolamine glycerophosphohydrolase	C00001[c] + C01233[c] -> C00093[c] + C00189[c]	MCA1922	MCA1922	3.1.4.2, 3.1.4.46	Glycerophospholipid metabolism	0	0	1000	0		3.1.4.2, 3.1.4.46
R01466	O-phospho-L-homoserine phosphate-lyase (adding water;L-threonine-forming)	C00001[c] + C01102[c] -> C00009[c] + C00188[c]	MCA0596	MCA0596	4.2.3.1	Glycine, serine and threonine metabolism	0	0	1000	0		4.2.3.1
R01457	cholesterol:NADP+ Delta24-oxidoreductase	C00006[c] + C00187[c] <=> C00080[c] + C00005[c] + C01802[c]	MCA1404	MCA1404	1.3.1.72	Steroid biosynthesis	1	-1000	1000	0		1.3.1.72
R01421	Benzoyl phosphate phosphohydrolase	C00001[c] + C06206[c] -> C00009[c] + C00180[c]	MCA0713	MCA0713	3.6.1.7	Aminobenzoate degradation	0	0	1000	0		3.6.1.7
R01411	5-Methylcytosine aminohydrolase	C00001[c] + C02376[c] -> C00014[c] + C00178[c]	MCA1307	MCA1307	3.5.4.1	Pyrimidine metabolism	0	0	1000	0		3.5.4.1
R01401	methylthioadenosine methylthioribohydrolase	C00001[c] + C00170[c] -> C00147[c] + C03089[c]	MCA0811	MCA0811	3.2.2.9	Cysteine and methionine metabolism	0	0	1000	0		3.2.2.9
R01398	Carbamoyl-phosphate:L-ornithine carbamoyltransferase	C00077[c] + C00169[c] -> C00009[c] + C00327[c]			2.1.3.3	Arginine biosynthesis	0	0	1000	0		2.1.3.3
R01397	carbamoyl-phosphate:L-aspartate carbamoyltransferase	C00049[c] + C00169[c] -> C00009[c] + C00438[c]	MCA2333	MCA2333	2.1.3.2	Pyrimidine metabolism	0	0	1000	0		2.1.3.2
R01385	UDP-glucuronate 4-epimerase	C00167[c] <=> C00617[c]	MCA2449	MCA2449	5.1.3.6	Amino sugar and nucleotide sugar metabolism	1	-1000	1000	0		5.1.3.6
R01384	UDP-D-glucuronate carboxy-lyase (UDP-D-xylose-forming)	C00167[c] -> C00011[c] + C00190[c]	MCA1165	MCA1165	4.1.1.35	Amino sugar and nucleotide sugar metabolism	0	0	1000	0		4.1.1.35
R01373	prephenate hydro-lyase (decarboxylating; phenylpyruvate-forming)	C00254[c] <=> C00001[c] + C00011[c] + C00166[c]	MCA1418	MCA1418	4.2.1.51	Phenylalanine, tyrosine and tryptophan biosynthesis	1	-1000	1000	0		4.2.1.51
R01354	ATP:propanoate adenylyltransferase	C00002[c] + C00163[c] -> C00013[c] + C05983[c]	MCA2043	MCA2043	6.2.1.1	Propanoate metabolism	0	0	1000	0		6.2.1.1
R01353	ATP:propanoate phosphotransferase	C00002[c] + C00163[c] -> C00008[c] + C02876[c]	MCA1589	MCA1589	2.7.2.1	Propanoate metabolism	0	0	1000	0		2.7.2.1
R01334	2-Phosphoglycolate phosphohydrolase	C00001[c] + C00988[c] -> C00009[c] + C00160[c]	MCA2583	MCA2583	3.1.3.18	Glyoxylate and dicarboxylate metabolism	0	0	1000	0		3.1.3.18
R01325	citrate hydro-lyase (cis-aconitate-forming)	C00158[c] <=> C00001[c] + C00417[c]	MCA2485	MCA2485	4.2.1.3	Citrate cycle (TCA cycle)	1	-1000	1000	0		4.2.1.3
R01320	S-adenosyl-L-methionine:phosphatidyl-N-dimethylethanolamine N-methyltransferase	C00019[c] + C04308[c] -> C00021[c] + C00157[c]	MCA3065	MCA3065	2.1.1.71	Glycerophospholipid metabolism	0	0	1000	0		2.1.1.71
R01302	chorismate pyruvate-lyase (4-hydroxybenzoate-forming)	C00022[c] + C00156[c] <=> C00251[c]	MCA1335	MCA1335	4.1.3.40	Ubiquinone and other terpenoid-quinone biosynthesis	1	-1000	1000	0		4.1.3.40
R01288	O4-succinyl-L-homoserine:hydrogen sulfide S-(3-amino-3-carboxypropyl)transferase;	C01118[c] + C00283[c] -> C00155[c] + C00042[c]	MCA2488	MCA2488	2.5.1.-	Cysteine and methionine metabolism	0	0	1000	0		2.5.1.-
R01286	L-cystathionine L-homocysteine-lyase (deaminating; pyruvate-forming)	C00001[c] + C02291[c] -> C00022[c] + C00014[c] + C00155[c]	MCA1021	MCA1021	4.4.1.8	Cysteine and methionine metabolism	0	0	1000	0		4.4.1.8
R01280	Palmitate:CoA ligase (AMP-forming)	C00249[c] + C00002[c] + C00010[c] -> C00013[c] + C00020[c] + C00154[c]	MCA1006 or MCA1569	MCA1006,MCA1569	6.2.1.3	Fatty acid biosynthesis	0	0	1000	0		6.2.1.3
R01268	Nicotinamide amidohydrolase	C00001[c] + C00153[c] -> C00014[c] + C00253[c]	MCA2761	MCA2761	3.5.1.19	Nicotinate and nicotinamide metabolism	0	0	1000	0		3.5.1.19
R01256	(S)-malate:CoA ligase (ADP-forming)	C00002[c] + C00010[c] + C00149[c] -> C00008[c] + C00009[c] + C04348[c]	MCA1740 and MCA1741	MCA1740,MCA1741	6.2.1.9	Glyoxylate and dicarboxylate metabolism	0	0	1000	0		6.2.1.9
R01251	L-Proline:NADP+ 5-oxidoreductase	C00006[c] + C00148[c] <=> C00080[c] + C03912[c] + C00005[c]	MCA1535	MCA1535	1.5.1.2	Arginine and proline metabolism	1	-1000	1000	0		1.5.1.2
R01248	L-Proline:NAD+ 5-oxidoreductase	C00003[c] + C00148[c] <=> C00080[c] + C03912[c] + C00004[c]	MCA1535	MCA1535	1.5.1.2	Arginine and proline metabolism	1	-1000	1000	0		1.5.1.2
R01231	Xanthosine-5'-phosphate:L-glutamine amido-ligase (AMP-forming)	C00001[c] + C00002[c] + C00064[c] + C00655[c] -> C00013[c] + C00025[c] + C00144[c] + C00020[c]	MCA0290	MCA0290	6.3.5.2	Purine metabolism	0	0	1000	0		6.3.5.2
R01230	Xanthosine-5'-phosphate:ammonia ligase (AMP-forming)	C00002[c] + C00014[c] + C00655[c] -> C00013[c] + C00144[c] + C00020[c]	MCA0290	MCA0290	6.3.5.2	Purine metabolism	0	0	1000	0		6.3.5.2
R01229	GMP:diphosphate 5-phospho-alpha-D-ribosyltransferase	C00013[c] + C00144[c] <=> C00119[c] + C00242[c]	MCA0816 or MCA1985	MCA0816,MCA1985	2.4.2.7, 2.4.2.8, 2.4.2.22	Purine metabolism	1	-1000	1000	0		2.4.2.7, 2.4.2.8, 2.4.2.22
R01227	guanosine 5'-monophosphate phosphohydrolase	C00001[c] + C00144[c] -> C00009[c] + C00387[c]	MCA0448 or MCA1322 or MCA2418 or MCA2982	MCA0448,MCA1322,MCA2418,MCA2982	3.1.3.5	Purine metabolism	0	0	1000	0		3.1.3.5
R01226	5,10-Methylenetetrahydrofolate:3-methyl-2-oxobutanoate hydroxymethyltransferase	C00001[c] + C00143[c] + C00141[c] -> C00101[c] + C00966[c]	MCA2314	MCA2314	2.1.2.11	Pantothenate and CoA biosynthesis	0	0	1000	0		2.1.2.11
R01224	5-methyltetrahydrofolate:NADP+ oxidoreductase	C00080[c] + C00005[c] + C00143[c] -> C00006[c] + C00440[c]	MCA0137	MCA0137	1.5.1.20	One carbon pool by folate	0	0	1000	0		1.5.1.20
R01221	glycine synthase;	C00003[c] + C00037[c] + C00101[c] <=> C00080[c] + C00011[c] + C00004[c] + C00014[c] + C00143[c]	MCA0350 and MCA0348 and MCA0349 and MCA0351 and MCA3002	MCA0350,MCA0348,MCA0349,MCA0351,MCA3002	1.4.4.2, 1.8.1.4, 2.1.2.10	Glyoxylate and dicarboxylate metabolism	1	-1000	1000	0		1.4.4.2, 1.8.1.4, 2.1.2.10
R01216	2-dehydropantoate formaldehyde-lyase (3-methyl-2-oxobutanoate-forming)	C00966[c] <=> C00067[c] + C00141[c]	MCA2314	MCA2314	2.1.2.11	Pantothenate and CoA biosynthesis	1	-1000	1000	0		2.1.2.11
R01214	L-Valine:2-oxoglutarate aminotransferase	C00026[c] + C00183[c] <=> C00025[c] + C00141[c]	MCA2344	MCA2344	2.6.1.42	Valine, leucine and isoleucine degradation	1	-1000	1000	0		2.6.1.42
R01213	acetyl-CoA:3-methyl-2-oxobutanoate C-acetyltransferase (thioester-hydrolysing, carboxymethyl-forming);	C00001[c] + C00024[c] + C00141[c] -> C00010[c] + C02504[c]	MCA2275	MCA2275	2.3.3.13	Valine, leucine and isoleucine biosynthesis	0	0	1000	0		2.3.3.13
R01209	2,3-Dihydroxy-3-methylbutanoate hydro-lyase	C04039[c] -> C00001[c] + C00141[c]	MCA2082	MCA2082	4.2.1.9	Pantothenate and CoA biosynthesis	0	0	1000	0		4.2.1.9
R01196	pyruvate:ferredoxin 2-oxidoreductase (CoA-acetylating)	C00010[c] + C00022[c] + 2 C00139[c] -> 2 C00080[c] + C00011[c] + C00024[c] + 2 C00138[c]	MCA0769	MCA0769	1.2.7.1	Glycolysis / Gluconeogenesis	0	0	1000	0		1.2.7.1
R01187	1D-myo-inositol 3-phosphate phosphohydrolase	C00001[c] + C04006[c] -> C00009[c] + C00137[c]	MCA2471 or MCA2609	MCA2471,MCA2609	3.1.3.25	Streptomycin biosynthesis	0	0	1000	0		3.1.3.25
R01186	1D-myo-inositol 4-phosphate phosphohydrolase	C00001[c] + C03546[c] -> C00009[c] + C00137[c]	MCA2471 or MCA2609	MCA2471,MCA2609	3.1.3.25	Inositol phosphate metabolism	0	0	1000	0		3.1.3.25
R01185	1D-myo-inositol 1-phosphate phosphohydrolase	C00001[c] + C01177[c] -> C00009[c] + C00137[c]	MCA2471 or MCA2609	MCA2471,MCA2609	3.1.3.25	Inositol phosphate metabolism	0	0	1000	0		3.1.3.25
R01167	L-histidine carboxy-lyase (histamine-forming)	C00135[c] -> C00011[c] + C00388[c]	MCA2307	MCA2307	4.1.1.22	Histidine metabolism	0	0	1000	0		4.1.1.22
R01163	L-histidinal:NAD+ oxidoreductase	C00001[c] + C00003[c] + C01929[c] <=> C00080[c] + C00004[c] + C00135[c]	MCA1963	MCA1963	1.1.1.23	Histidine metabolism	1	-1000	1000	0		1.1.1.23
R01152	N-Carbamoylputrescine amidohydrolase	C00001[c] + C00436[c] -> C00011[c] + C00014[c] + C00134[c]	MCA1862	MCA1862	3.5.1.53	Arginine and proline metabolism	0	0	1000	0		3.5.1.53
R01150	D-alanine:D-alanine ligase (ADP-forming)	C00002[c] + 2 C00133[c] -> C00008[c] + C00009[c] + C00993[c]	MCA2426	MCA2426	6.3.2.4	D-Alanine metabolism	0	0	1000	0		6.3.2.4
R01148	D-Alanine:2-oxoglutarate aminotransferase	C00026[c] + C00133[c] <=> C00022[c] + C00217[c]	MCA0106	MCA0106	2.6.1.21	D-Alanine metabolism	1	-1000	1000	0		2.6.1.21
R01146	methanol:ferricytochrome-c oxidoreductase;	C00132[p] + 2 C18233[p] <=> 2 C00080[c] + C00067[c] + 2 C18234[p]	MCA0779 and MCA0780 and MCA0781 and MCA0782 and MCA0785 and (MCA0786 or MCA1528) and (MCA0787 or MCA1529) and (MCA0788 or MCA1530) and MCA0789	MCA0779,MCA0780,MCA0781,MCA0782,MCA0785,MCA0786,MCA1528,MCA0787,MCA1529,MCA0788,MCA1530,MCA0789	1.1.2.7	Methane metabolism	1	-1000	1000	0		1.1.2.7
R01142	Methane,NADH:oxygen oxidoreductase (hydroxylating)	C00080[c] + C00004[c] + C00007[c] + C01438[c] -> C00001[c] + C00003[c] + C00132[c]	MCA1194 and MCA1195 and MCA1198 and MCA1196 and MCA1199 and MCA1200	MCA1194,MCA1195,MCA1198,MCA1196,MCA1199,MCA1200	1.14.13.25	Methane metabolism	0	0	1000	0		1.14.13.25
R01138	dATP:pyruvate 2-O-phosphotransferase	C00022[c] + C00131[c] <=> C00074[c] + C00206[c]	MCA2597	MCA2597	2.7.1.40	Purine metabolism	1	-1000	1000	0		2.7.1.40
R01137	ATP:dADP phosphotransferase	C00002[c] + C00206[c] -> C00008[c] + C00131[c]	MCA2886	MCA2886	2.7.4.6	Purine metabolism	0	0	1000	0		2.7.4.6
R01135	IMP:L-aspartate ligase (GDP-forming)	C00044[c] + C00049[c] + C00130[c] <=> C00009[c] + C00035[c] + C03794[c]	MCA1978	MCA1978	6.3.4.4	Purine metabolism	1	-1000	1000	0		6.3.4.4
R01132	IMP:diphosphate phospho-D-ribosyltransferase	C00013[c] + C00130[c] <=> C00262[c] + C00119[c]	MCA1985	MCA1985	2.4.2.8	Purine metabolism	1	-1000	1000	0		2.4.2.8
R01130	IMP:NAD+ oxidoreductase	C00001[c] + C00003[c] + C00130[c] -> C00080[c] + C00004[c] + C00655[c]	MCA0291	MCA0291	1.1.1.205	Purine metabolism	0	0	1000	0		1.1.1.205
R01127	IMP 1,2-hydrolase (decyclizing)	C00001[c] + C00130[c] <=> C04734[c]	MCA1741	MCA1741	2.1.2.3	Purine metabolism	1	-1000	1000	0		2.1.2.3
R01126	inosine 5'-monophosphate phosphohydrolase	C00001[c] + C00130[c] -> C00009[c] + C00294[c]	MCA0448 or MCA1322 or MCA2418 or MCA2982	MCA0448,MCA1322,MCA2418,MCA2982	3.1.3.5	Purine metabolism	0	0	1000	0		3.1.3.5
R01106	nitrite:(acceptor) oxidoreductase	C00001[c] + 2 C00125[c] + C00088[c] <=> 2 C00080[c] + 2 C00126[c] + C00244[c]	MCA0590	MCA0590	1.7.99.4	Nitrogen metabolism	1	-1000	1000	0		1.7.99.4
R01090	L-Leucine:2-oxoglutarate aminotransferase	C00026[c] + C00123[c] <=> C00025[c] + C00233[c]	MCA2344	MCA2344	2.6.1.42	Valine, leucine and isoleucine degradation	1	-1000	1000	0		2.6.1.42
R01086	2-(Nomega-L-arginino)succinate arginine-lyase (fumarate-forming)	C03406[c] -> C00122[c] + C00062[c]	MCA1248	MCA1248	4.3.2.1	Arginine biosynthesis	0	0	1000	0		4.3.2.1
R01085	3-fumarylpyruvate fumarylhydrolase	C00001[c] + C02514[c] -> C00022[c] + C00122[c]	MCA0263	MCA0263	3.7.1.20	Tyrosine metabolism	0	0	1000	0		3.7.1.20
R01083	N6-(1,2-dicarboxyethyl)AMP AMP-lyase (fumarate-forming)	C03794[c] <=> C00020[c] + C00122[c]	MCA1784	MCA1784	4.3.2.2	Purine metabolism	1	-1000	1000	0		4.3.2.2
R01082	(S)-malate hydro-lyase (fumarate-forming)	C00149[c] <=> C00001[c] + C00122[c]	MCA1543	MCA1543	4.2.1.2	Citrate cycle (TCA cycle)	1	-1000	1000	0		4.2.1.2
R01078	dethiobiotin:sulfur sulfurtransferase	2 C00080[c] + 2 C00019[c] + C17023[c] + C01909[c] + 2 C05359[c] -> 2 C05198[c] + 2 C00073[c] + C00120[c]	MCA1125	MCA1125	2.8.1.6	Biotin metabolism	0	0	1000	0		2.8.1.6
R01074	biotin:CoA ligase (AMP-forming);	C00002[c] + C00120[c] -> C00013[c] + C05921[c]	MCA1781	MCA1781	6.3.4.15	Biotin metabolism	0	0	1000	0		6.3.4.15
R01073	N-(5-Phospho-D-ribosyl)anthranilate:pyrophosphate phosphoribosyl-transferase	C00013[c] + C04302[c] <=> C00119[c] + C00108[c]	MCA2586	MCA2586	2.4.2.18	Phenylalanine, tyrosine and tryptophan biosynthesis	1	-1000	1000	0		2.4.2.18
R01072	5-phosphoribosylamine:diphosphate phospho-alpha-D-ribosyltransferase (glutamate-amidating)	C00001[c] + C00064[c] + C00119[c] -> C00013[c] + C00025[c] + C03090[c]	MCA2489	MCA2489	2.4.2.14	Purine metabolism	0	0	1000	0		2.4.2.14
R01071	1-(5-phospho-D-ribosyl)-ATP:diphosphate phospho-alpha-D-ribosyl-transferase	C00013[c] + C02739[c] <=> C00002[c] + C00119[c]	MCA1964 and MCA1979	MCA1964,MCA1979	2.4.2.17	Histidine metabolism	1	-1000	1000	0		2.4.2.17
R01070	beta-D-fructose-1,6-bisphosphate D-glyceraldehyde-3-phosphate-lyase (glycerone-phosphate-forming)	C05378[c] <=> C00111[c] + C00118[c]	MCA3041 or MCA3047	MCA3041,MCA3047	4.1.2.13	Glycolysis / Gluconeogenesis	1	-1000	1000	0		4.1.2.13
R01068	D-fructose-1,6-bisphosphate D-glyceraldehyde-3-phosphate-lyase (glycerone-phosphate-forming)	C00354[c] <=> C00111[c] + C00118[c]	MCA3041 or MCA3047	MCA3041,MCA3047	4.1.2.13	Calvin Cycle	1	-1000	1000	0		4.1.2.13
R01067	D-Fructose 6-phosphate:D-glyceraldehyde-3-phosphate glycolaldehyde transferase	C00085[c] + C00118[c] <=> C00279[c] + C00231[c]	MCA3040 or MCA3046	MCA3040,MCA3046	2.2.1.1	Calvin Cycle	1	-1000	1000	0		2.2.1.1
R01061	D-glyceraldehyde-3-phosphate:NAD+ oxidoreductase (phosphorylating)	C00009[c] + C00003[c] + C00118[c] <=> C00080[c] + C00004[c] + C00236[c]	MCA2598	MCA2598	1.2.1.12	Calvin Cycle	1	-1000	1000	0		1.2.1.12
R01057	D-Ribose 1,5-phosphomutase	C00620[c] <=> C00117[c]	MCA0607 or MCA2782	MCA0607,MCA2782	5.4.2.2	Pentose phosphate pathway	1	-1000	1000	0		5.4.2.2
R01056	D-ribose-5-phosphate aldose-ketose-isomerase	C00117[c] <=> C00199[c]	MCA0043 or MCA0355	MCA0043,MCA0355	5.3.1.6	Calvin Cycle	1	-1000	1000	0		5.3.1.6
R01054	ADP-ribose ribophosphohydrolase	C00001[c] + C00301[c] -> C00020[c] + C00117[c]	MCA1477	MCA1477	3.6.1.13, 3.6.1.-	Purine metabolism	0	0	1000	0		3.6.1.13, 3.6.1.-
R01049	ATP:D-ribose-5-phosphate diphosphotransferase	C00002[c] + C00117[c] -> C00020[c] + C00119[c]	MCA1056 or MCA1716	MCA1056,MCA1716	2.7.6.1	Pentose phosphate pathway	0	0	1000	0		2.7.6.1
R01030	sn-Glycero-3-phosphocholine glycerophosphohydrolase	C00001[c] + C00670[c] -> C00093[c] + C00114[c]	MCA1922	MCA1922	3.1.4.2, 3.1.4.46	Glycerophospholipid metabolism	0	0	1000	0		3.1.4.2, 3.1.4.46
R01015	D-glyceraldehyde-3-phosphate aldose-ketose-isomerase	C00118[c] <=> C00111[c]	MCA0674	MCA0674	5.3.1.1	Glycolysis / Gluconeogenesis	1	-1000	1000	0		5.3.1.1
R01011	ATP:glycerone phosphotransferase	C00002[c] + C00184[c] -> C00008[c] + C00111[c]	MCA0039 and MCA0040	MCA0039,MCA0040	2.7.1.29	Glycerolipid metabolism	0	0	1000	0		2.7.1.29
R00996	L-threonine ammonia-lyase (2-oxobutanoate-forming)	C00188[c] -> C00109[c] + C00014[c]	MCA0354	MCA0354	4.3.1.19	Glycine, serine and threonine metabolism	0	0	1000	0		4.3.1.19
R00994	(2R,3S)-3-methylmalate:NAD+ oxidoreductase	C00003[c] + C06032[c] -> C00080[c] + C00011[c] + C00004[c] + C00109[c]	MCA2063	MCA2063	1.1.1.85	Valine, leucine and isoleucine biosynthesis	0	0	1000	0		1.1.1.85
R00986	Chorismate pyruvate-lyase (amino-accepting)	C00064[c] + C00251[c] -> C00025[c] + C00022[c] + C00108[c]	MCA2584 and MCA2585	MCA2584,MCA2585	4.1.3.27	Phenylalanine, tyrosine and tryptophan biosynthesis	0	0	1000	0		4.1.3.27
R00985	chorismate pyruvate-lyase (amino-accepting; anthranilate-forming)	C00014[c] + C00251[c] -> C00001[c] + C00022[c] + C00108[c]	MCA2584 and MCA2585	MCA2584,MCA2585	4.1.3.27	Phenylalanine, tyrosine and tryptophan biosynthesis	0	0	1000	0		4.1.3.27
R00974	Cytosine aminohydrolase	C00001[c] + C00380[c] -> C00014[c] + C00106[c]	MCA1307	MCA1307	3.5.4.1	Pyrimidine metabolism	0	0	1000	0		3.5.4.1
R00966	UMP:diphosphate phospho-alpha-D-ribosyltransferase	C00013[c] + C00105[c] <=> C00119[c] + C00106[c]	MCA2334	MCA2334	2.4.2.9	Pyrimidine metabolism	1	-1000	1000	0		2.4.2.9
R00965	orotidine-5'-phosphate carboxy-lyase (UMP-forming)	C01103[c] -> C00011[c] + C00105[c]	MCA1094	MCA1094	4.1.1.23	Pyrimidine metabolism	0	0	1000	0		4.1.1.23
R00963	uridine 5'-monophosphate phosphohydrolase	C00001[c] + C00105[c] -> C00009[c] + C00299[c]	MCA0448 or MCA1322 or MCA2418 or MCA2982	MCA0448,MCA1322,MCA2418,MCA2982	3.1.3.5	Pyrimidine metabolism	0	0	1000	0		3.1.3.5
R00959	alpha-D-Glucose 1-phosphate 1,6-phosphomutase	C00103[c] <=> C00668[c]	MCA0607 or MCA2782	MCA0607,MCA2782	5.4.2.2	Glycolysis / Gluconeogenesis	1	-1000	1000	0		5.4.2.2
R00948	ATP:alpha-D-glucose-1-phosphate adenylyltransferase	C00103[c] + C00002[c] -> C00498[c] + C00013[c]	MCA1474	MCA1474	2.7.7.27	Starch and sucrose metabolism	0	0	1000	0		2.7.7.27
R00946	5-Methyltetrahydrofolate:L-homocysteine S-methyltransferase	C00440[c] + C00155[c] -> C00073[c] + C00101[c]	MCA1545	MCA1545	2.1.1.13	Cysteine and methionine metabolism	0	0	1000	0		2.1.1.13
R00945	5,10-Methylenetetrahydrofolate:glycine hydroxymethyltransferase	C00001[c] + C00037[c] + C00143[c] <=> C00065[c] + C00101[c]	MCA1660	MCA1660	2.1.2.1	Glycine, serine and threonine metabolism	1	-1000	1000	0		2.1.2.1
R00943	Formate:tetrahydrofolate ligase (ADP-forming)	C00002[c] + C00058[c] + C00101[c] -> C00008[c] + C00009[c] + C00234[c]	MCA2219	MCA2219	6.3.4.3	One carbon pool by folate	0	0	1000	0		6.3.4.3
R00942	Tetrahydrofolate:L-glutamate gamma-ligase (ADP-forming)	C00002[c] + C00025[c] + C00101[c] -> C00008[c] + C00009[c] + C09332[c]	MCA2492	MCA2492	6.3.2.17	Folate biosynthesis	0	0	1000	0		6.3.2.17
R00941	10-formyltetrahydrofolate:NADP+ oxidoreductase	C00001[c] + C00006[c] + C00234[c] <=> C00080[c] + C00005[c] + C00011[c] + C00101[c]			1.5.1.6	One carbon pool by folate	1	-1000	1000	0		1.5.1.6
R00940	5,6,7,8-tetrahydrofolate:NADP+ oxidoreductase	2 C00080[c] + 2 C00005[c] + C00504[c] -> 2 C00006[c] + C00101[c]	MCA2729	MCA2729	1.5.1.3	One carbon pool by folate	0	0	1000	0		1.5.1.3
R00939	5,6,7,8-tetrahydrofolate:NADP+ oxidoreductase	C00006[c] + C00101[c] <=> C00080[c] + C00005[c] + C00415[c]	MCA2729	MCA2729	1.5.1.3	One carbon pool by folate	1	-1000	1000	0		1.5.1.3
R00937	5,6,7,8-tetrahydrofolate:NAD+ oxidoreductase	2 C00080[c] + 2 C00004[c] + C00504[c] -> 2 C00003[c] + C00101[c]	MCA2729	MCA2729	1.5.1.3	One carbon pool by folate	0	0	1000	0		1.5.1.3
R00936	5,6,7,8-tetrahydrofolate:NAD+ oxidoreductase	C00003[c] + C00101[c] <=> C00080[c] + C00004[c] + C00415[c]	MCA2729	MCA2729	1.5.1.3	One carbon pool by folate	1	-1000	1000	0		1.5.1.3
R00934	L-erythro-3-methylmalyl-CoA glyoxylate-lyase (propanoyl-CoA-forming)	C00048[c] + C00100[c] <=> C06027[c]	MCA1739	MCA1739	4.1.3.24	Glyoxylate and dicarboxylate metabolism	1	-1000	1000	0		4.1.3.24
R00926	Propionyladenylate:CoA propionyltransferase	C00010[c] + C05983[c] <=> C00020[c] + C00100[c]	MCA2043	MCA2043	6.2.1.1	Propanoate metabolism	1	-1000	1000	0		6.2.1.1
R00899	L-cysteinylglycine dipeptidase	C00001[c] + C01419[c] <=> C00037[c] + C00097[c]	MCA2099 or MCA0774	MCA2099,MCA0774	3.4.11.1, 3.4.11.2	Glutathione metabolism	1	-1000	1000	0		3.4.11.1, 3.4.11.2
R00897	O3-acetyl-L-serine:hydrogen-sulfide 2-amino-2-carboxyethyltransferase;	C00979[c] + C00283[c] -> C00033[c] + C00097[c]	MCA1022 or MCA1899	MCA1022,MCA1899	2.5.1.47	Cysteine and methionine metabolism	0	0	1000	0		2.5.1.47
R00896	L-cysteine:2-oxoglutarate aminotransferase	C00026[c] + C00097[c] <=> C00957[c] + C00302[c]	MCA2202	MCA2202	2.6.1.1	Cysteine and methionine metabolism	1	-1000	1000	0		2.6.1.1
R00894	L-glutamate:L-cysteine gamma-ligase (ADP-forming)	C00002[c] + C00025[c] + C00097[c] -> C00008[c] + C00009[c] + C00669[c]	MCA2467	MCA2467	6.3.2.2	Glutathione metabolism	0	0	1000	0		6.3.2.2
R00888	GDP-alpha-D-mannose 4,6-hydro-lyase (GDP-4-dehydro-alpha-D-rhamnose-forming);	C00096[c] -> C00001[c] + C01222[c]	MCA1146	MCA1146	4.2.1.47	Fructose and mannose metabolism	0	0	1000	0		4.2.1.47
R00885	GTP:alpha-D-mannose-1-phosphate guanylyltransferase	C00044[c] + C00636[c] -> C00013[c] + C00096[c]	MCA2033	MCA2033	2.7.7.13	Fructose and mannose metabolism	0	0	1000	0		2.7.7.13
R00858	hydrogen-sulfide:NADP+ oxidoreductase	3 C00001[c] + 3 C00006[c] + C00283[c] <=> 3 C00080[c] + 3 C00005[c] + C00094[c]	MCA0431 and MCA2059	MCA0431,MCA2059	1.8.1.2	Sulfur metabolism	1	-1000	1000	0		1.8.1.2
R00851	acyl-CoA:sn-glycerol-3-phosphate 1-O-acyltransferase	C00093[c] + C00040[c] -> C00010[c] + C00681[c]	MCA2004 or MCA2989	MCA2004,MCA2989	2.3.1.15	Glycerolipid metabolism	0	0	1000	0		2.3.1.15
R00847		C00116[c] + C00002[c] <=> C00008[c] + C00093[c]			2.7.1.30	Glycerolipid metabolism	1	-1000	1000	0		2.7.1.30
R00844	sn-Glycerol-3-phosphate:NADP+ 2-oxidoreductase	C00093[c] + C00006[c] <=> C00080[c] + C00111[c] + C00005[c]	MCA2538	MCA2538	1.1.1.94	Glycerophospholipid metabolism	1	-1000	1000	0		1.1.1.94
R00842	sn-Glycerol-3-phosphate:NAD+ 2-oxidoreductase	C00093[c] + C00003[c] <=> C00080[c] + C00111[c] + C00004[c]	MCA2538	MCA2538	1.1.1.94	Glycerophospholipid metabolism	1	-1000	1000	0		1.1.1.94
R00835	D-glucose-6-phosphate:NADP+ 1-oxidoreductase	C00006[c] + C00092[c] <=> C00080[c] + C00005[c] + C01236[c]	MCA0025 or MCA2971	MCA0025,MCA2971	1.1.1.49, 1.1.1.363	Pentose phosphate pathway	1	-1000	1000	0		1.1.1.49, 1.1.1.363
R00806		C00095[c] + C00029[c] <=> C00089[c] + C00015[c]			2.4.1.13	Starch and sucrose metabolism	1	-1000	1000	0		2.4.1.13
R00802	sucrose alpha-glucohydrolase	C00001[c] + C00089[c] <=> C00267[c] + C02336[c]	MCA0942	MCA0942	3.2.1.20	Galactose metabolism	1	-1000	1000	0		3.2.1.20
R00801	sucrose glucohydrolase	C00001[c] + C00089[c] -> C00095[c] + C00031[c]	MCA0942	MCA0942	3.2.1.10	Galactose metabolism	0	0	1000	0		3.2.1.10
R00787	ammonia:NAD+ oxidoreductase	3 C00080[c] + 3 C00004[c] + C00088[c] <=> 2 C00001[c] + 3 C00003[c] + C00014[c]	MCA0591 and MCA0592	MCA0591,MCA0592	1.7.1.4	Nitrogen metabolism	1	-1000	1000	0		1.7.1.4
R00782	L-cysteine hydrogen-sulfide-lyase (deaminating; pyruvate-forming)	C00001[c] + C00097[c] <=> C00022[c] + C00014[c] + C00283[c]	MCA1021	MCA1021	4.4.1.8	Cysteine and methionine metabolism	1	-1000	1000	0		4.4.1.8
R00771	D-glucose-6-phosphate aldose-ketose-isomerase	C00092[c] <=> C00085[c]	MCA1247	MCA1247	5.3.1.9	Starch and sucrose metabolism	1	-1000	1000	0		5.3.1.9
R00768	L-glutamine:D-fructose-6-phosphate isomerase (deaminating);	C00085[c] + C00064[c] -> C00025[c] + C00352[c]	MCA0015	MCA0015	2.6.1.16	Alanine, aspartate and glutamate metabolism	0	0	1000	0		2.6.1.16
R00756	ATP:D-fructose-6-phosphate 1-phosphotransferase	C00085[c] + C00002[c] -> C00008[c] + C00354[c]	MCA1251	MCA1251	2.7.1.11	Methane metabolism	0	0	1000	0		2.7.1.11
R00754	ethanol:NAD+ oxidoreductase	C00003[c] + C00469[c] <=> C00080[c] + C00004[c] + C00084[c]	MCA0775	MCA0775	1.1.1.1	Glycolysis / Gluconeogenesis	1	-1000	1000	0		1.1.1.1
R00742	acetyl-CoA:carbon-dioxide ligase (ADP-forming)	C00002[c] + C00024[c] + C00288[c] -> C00008[c] + C00009[c] + C00083[c]	MCA1045 and MCA1046 and MCA1804 and MCA2493	MCA1045,MCA1046,MCA1804,MCA2493	6.4.1.2	Fatty acid biosynthesis	0	0	1000	0		6.4.1.2
R00734	L-tyrosine:2-oxoglutarate aminotransferase	C00026[c] + C00082[c] <=> C00025[c] + C01179[c]	MCA2202 or MCA1113 or MCA1417	MCA2202,MCA1113,MCA1417	2.6.1.1, 2.6.1.9	Ubiquinone and other terpenoid-quinone biosynthesis	1	-1000	1000	0		2.6.1.1, 2.6.1.9
R00722	ATP:IDP phosphotransferase	C00002[c] + C00104[c] -> C00008[c] + C00081[c]	MCA2886	MCA2886	2.7.4.6	Purine metabolism	0	0	1000	0		2.7.4.6
R00720	Inosine 5'-triphosphate pyrophosphohydrolase	C00001[c] + C00081[c] -> C00013[c] + C00130[c]	MCA0046	MCA0046	3.6.1.8, 3.6.1.-	Purine metabolism	0	0	1000	0		3.6.1.8, 3.6.1.-
R00714	succinate-semialdehyde:NADP+ oxidoreductase	C00001[c] + C00006[c] + C00232[c] -> C00080[c] + C00005[c] + C00042[c]	MCA1756	MCA1756	1.2.1.79	Alanine, aspartate and glutamate metabolism	0	0	1000	0		1.2.1.79
R00713	succinate-semialdehyde:NAD+ oxidoreductase	C00001[c] + C00003[c] + C00232[c] -> C00080[c] + C00004[c] + C00042[c]	MCA1756	MCA1756	1.2.1.16	Alanine, aspartate and glutamate metabolism	0	0	1000	0		1.2.1.16
R00709	isocitrate:NAD+ oxidoreductase (decarboxylating)	C00003[c] + C00311[c] <=> C00080[c] + C00011[c] + C00004[c] + C00026[c]	MCA3071	MCA3071	1.1.1.41	Citrate cycle (TCA cycle)	1	-1000	1000	0		1.1.1.41
R00704	(R)-Lactate:NAD+ oxidoreductase	C00003[c] + C00256[c] <=> C00080[c] + C00004[c] + C00022[c]	MCA0182	MCA0182	1.1.1.28	Pyruvate metabolism	1	-1000	1000	0		1.1.1.28
R00702	farnesyl-diphosphate:farnesyl-diphosphate farnesyltransferase	2 C00448[c] -> C00013[c] + C03428[c]	MCA0813	MCA0813	2.5.1.21	Steroid biosynthesis	0	0	1000	0		2.5.1.21
R00694	L-Phenylalanine:2-oxoglutarate aminotransferase	C00026[c] + C00079[c] <=> C00025[c] + C00166[c]	MCA2202 or MCA1113 or MCA1417	MCA2202, MCA1113, MCA1417	2.6.1.1, 2.6.1.9	Phenylalanine metabolism	1	-1000	1000	0		2.6.1.1, 2.6.1.9
R00691	L-arogenate hydro-lyase (decarboxylating; L-phenylalanine-forming)	C00826[c] -> C00001[c] + C00011[c] + C00079[c]	MCA1418	MCA1418	4.2.1.51	Phenylalanine, tyrosine and tryptophan biosynthesis	0	0	1000	0		4.2.1.51
R00674	L-serine hydro-lyase (adding indole; L-tryptophan-forming)	C00065[c] + C00463[c] -> C00001[c] + C00078[c]	MCA2494 and MCA2495	MCA2494,MCA2495	4.2.1.20	Phenylalanine, tyrosine and tryptophan biosynthesis	0	0	1000	0		4.2.1.20
R00669	N2-Acetyl-L-ornithine amidohydrolase	C00001[c] + C00437[c] -> C00033[c] + C00077[c]	MCA2083	MCA2083	3.5.1.16	Arginine biosynthesis	0	0	1000	0		3.5.1.16
R00667	L-Ornithine:2-oxo-acid aminotransferase	C00026[c] + C00077[c] <=> C01165[c] + C00025[c]	MCA0809	MCA0809	2.6.1.13	Arginine and proline metabolism	1	-1000	1000	0		2.6.1.13
R00662	Uridine triphosphate pyrophosphohydrolase	C00001[c] + C00075[c] -> C00013[c] + C00105[c]	MCA0046	MCA0046	3.6.1.8, 3.6.1.9	Pyrimidine metabolism	0	0	1000	0		3.6.1.8, 3.6.1.9
R00660	Phosphoenolpyruvate:UDP-N-acetyl-D-glucosamine 1-carboxyvinyl-transferase	C00043[c] + C00074[c] -> C00009[c] + C04631[c]	MCA1965	MCA1965	2.5.1.7	Amino sugar and nucleotide sugar metabolism	0	0	1000	0		2.5.1.7
R00658	2-phospho-D-glycerate hydro-lyase (phosphoenolpyruvate-forming)	C00631[c] <=> C00001[c] + C00074[c]	MCA1933 or MCA2515	MCA1933,MCA2515	4.2.1.11	Glycolysis / Gluconeogenesis	1	-1000	1000	0		4.2.1.11
R00621		C00026[c] + C00068[c] -> C00011[c] + C05381[c]	MCA1952	MCA1952	1.2.4.2	Citrate cycle (TCA cycle)	0	0	1000	0		1.2.4.2
R00617	ATP:thiamin-phosphate phosphotransferase	C00002[c] + C01081[c] -> C00008[c] + C00068[c]	MCA1653	MCA1653	2.7.4.16	Thiamine metabolism	0	0	1000	0		2.7.4.16
R00588	L-Serine:glyoxylate aminotransferase	C00065[c] + C00048[c] <=> C00037[c] + C00168[c]	MCA1406	MCA1406	2.6.1.45	Glycine, serine and threonine metabolism	1	-1000	1000	0		2.6.1.45
R00586	acetyl-CoA:L-serine O-acetyltransferase	C00065[c] + C00024[c] <=> C00010[c] + C00979[c]	MCA1436 or MCA1830 or MCA2611	MCA1436,MCA1830,MCA2611	2.3.1.30	Cysteine and methionine metabolism	1	-1000	1000	0		2.3.1.30
R00585	L-Serine:pyruvate aminotransferase	C00065[c] + C00022[c] <=> C00041[c] + C00168[c]	MCA1406	MCA1406	2.6.1.51	Glycine, serine and threonine metabolism	1	-1000	1000	0		2.6.1.51
R00582	O-phospho-L-serine phosphohydrolase	C00001[c] + C01005[c] -> C00009[c] + C00065[c]	MCA1267	MCA1267	3.1.3.3	Glycine, serine and threonine metabolism	0	0	1000	0		3.1.3.3
R00578	L-aspartate:L-glutamine amido-ligase (AMP-forming)	C00001[c] + C00002[c] + C00049[c] + C00064[c] -> C00013[c] + C00025[c] + C00020[c] + C00152[c]	MCA0472 or MCA0542 or MCA2127	MCA0472,MCA0542,MCA2127	6.3.5.4	Alanine, aspartate and glutamate metabolism	0	0	1000	0		6.3.5.4
R00575	HCO3-:L-glutamine amido-ligase (ADP-forming, carbamate-phosphorylating)	C00001[c] + 2 C00002[c] + C00288[c] + C00064[c] -> 2 C00008[c] + C00009[c] + C00025[c] + C00169[c]	MCA1852 and MCA1853	MCA1852,MCA1853	6.3.5.5	Pyrimidine metabolism	0	0	1000	0		6.3.5.5
R00573	UTP:L-glutamine amido-ligase (ADP-forming)	C00001[c] + C00002[c] + C00075[c] + C00064[c] -> C00008[c] + C00009[c] + C00063[c] + C00025[c]	MCA2513	MCA2513	6.3.4.2	Pyrimidine metabolism	0	0	1000	0		6.3.4.2
R00571	UTP:ammonia ligase (ADP-forming)	C00002[c] + C00075[c] + C00014[c] -> C00008[c] + C00009[c] + C00063[c]	MCA2513	MCA2513	6.3.4.2	Pyrimidine metabolism	0	0	1000	0		6.3.4.2
R00570	ATP:CDP phosphotransferase	C00002[c] + C00112[c] -> C00008[c] + C00063[c]	MCA2886	MCA2886	2.7.4.6	Pyrimidine metabolism	0	0	1000	0		2.7.4.6
R00568	CTP aminohydrolase	C00001[c] + C00063[c] -> C00075[c] + C00014[c]	MCA0053	MCA0053	3.5.4.13	Pyrimidine metabolism	0	0	1000	0		3.5.4.13
R00566	L-arginine carboxy-lyase (agmatine-forming)	C00062[c] -> C00011[c] + C00179[c]	MCA2047	MCA2047	4.1.1.19	Arginine and proline metabolism	0	0	1000	0		4.1.1.19
R00549	ATP:riboflavin 5'-phosphotransferase	C00002[c] + C00255[c] -> C00008[c] + C00061[c]	MCA2252	MCA2252	2.7.1.26	Riboflavin metabolism	0	0	1000	0		2.7.1.26
R00548	riboflavin-5-phosphate phosphohydrolase (acid optimum)	C00001[c] + C00061[c] <=> C00009[c] + C00255[c]	MCA2221	MCA2221	3.1.3.2	Riboflavin metabolism	1	-1000	1000	0		3.1.3.2
R00529	ATP:sulfate adenylyltransferase	C00002[c] + C00059[c] -> C00013[c] + C00224[c]	MCA2628 or MCA2629	MCA2628,MCA2629	2.7.7.4	Purine metabolism	0	0	1000	0		2.7.7.4
R00528	Sulfite:ferricytochrome-c oxidoreductase	C00001[c] + 2 C00125[c] + C00094[c] <=> 2 C00080[c] + 2 C00126[c] + C00059[c]			1.8.2.1	Sulfur metabolism	1	-1000	1000	0		1.8.2.1
R00519	formate:NAD+ oxidoreductase	C00003[c] + C00058[c] <=> C00080[c] + C00011[c] + C00004[c]	(MCA1209 or MCA1392) and (MCA1393 or MCA1208) and (MCA2576 or MCA1391 or MCA1210) and MCA1389	MCA1209,MCA1392,MCA1393,MCA1208,MCA2576,MCA1391,MCA1210,MCA1389	1.2.1.2	Glyoxylate and dicarboxylate metabolism	1	-1000	1000	0		1.2.1.2
R00515	CTP diphosphohydrolase (diphosphate-forming);	C00001[c] + C00063[c] -> C00013[c] + C00055[c]	MCA0046	MCA0046	3.6.1.8, 3.6.1.9	Pyrimidine metabolism	0	0	1000	0		3.6.1.8, 3.6.1.9
R00512	ATP:CMP phosphotransferase	C00055[c] + C00002[c] -> C00008[c] + C00112[c]	MCA1414	MCA1414	2.7.4.25	Pyrimidine metabolism	0	0	1000	0		2.7.4.25
R00511	cytidine-5'-monophosphate phosphohydrolase	C00001[c] + C00055[c] -> C00009[c] + C00475[c]	MCA0448 or MCA1322 or MCA2418 or MCA2982	MCA0448,MCA1322,MCA2418,MCA2982	3.1.3.5	Pyrimidine metabolism	0	0	1000	0		3.1.3.5
R00509	ATP:adenylylsulfate 3'-phosphotransferase	C00002[c] + C00224[c] -> C00008[c] + C00053[c]	MCA2204 or MCA2628	MCA2204,MCA2628	2.7.1.25	Purine metabolism	0	0	1000	0		2.7.1.25
R00508	3'-phospho-5'-adenylyl sulfate 3'-phosphohydrolase	C00001[c] + C00053[c] -> C00009[c] + C00224[c]	MCA2983	MCA2983	3.1.3.7	Sulfur metabolism	0	0	1000	0		3.1.3.7
R00497	gamma-L-glutamyl-L-cysteine:glycine ligase (ADP-forming)	C00002[c] + C00037[c] + C00669[c] -> C00008[c] + C00009[c] + C00051[c]	MCA2338	MCA2338	6.3.2.3	Glutathione metabolism	0	0	1000	0		6.3.2.3
R00494	glutathione gamma-glutamylaminopeptidase	C00001[c] + C00051[c] <=> C00025[c] + C01419[c]	MCA2148	MCA2148	3.4.19.13	Glutathione metabolism	1	-1000	1000	0		3.4.19.13
R00489	L-aspartate 1-carboxy-lyase (beta-alanine-forming)	C00049[c] -> C00011[c] + C00099[c]	MCA2316	MCA2316	4.1.1.11	beta-Alanine metabolism	0	0	1000	0		4.1.1.11
R00483	L-aspartate:ammonia ligase (AMP-forming)	C00002[c] + C00014[c] + C00049[c] -> C00013[c] + C00020[c] + C00152[c]	MCA0472 or MCA0542 or MCA2127	MCA0472,MCA0542,MCA2127	6.3.1.1, 6.3.5.4	Alanine, aspartate and glutamate metabolism	0	0	1000	0		6.3.1.1, 6.3.5.4
R00481	L-aspartate:oxygen oxidoreductase	C00007[c] + C00049[c] -> C00027[c] + C05840[c]	MCA1472	MCA1472	1.4.3.16	Nicotinate and nicotinamide metabolism	0	0	1000	0		1.4.3.16
R00480	ATP:L-aspartate 4-phosphotransferase	C00002[c] + C00049[c] -> C00008[c] + C03082[c]	MCA0390	MCA0390	2.7.2.4	Glycine, serine and threonine metabolism	0	0	1000	0		2.7.2.4
R00475	glycolate:oxygen 2-oxidoreductase	C00007[c] + C00160[c] -> C00027[c] + C00048[c]	MCA1500 and MCA1501 and (MCA1748 or MCA1499)	MCA1500,MCA1501,MCA1748,MCA1499	1.1.3.15	Glyoxylate and dicarboxylate metabolism	0	0	1000	0		1.1.3.15
R00473	L-malyl-CoA glyoxylate-lyase (acetyl-CoA-forming)	C04348[c] <=> C00024[c] + C00048[c]	MCA1739	MCA1739	4.1.3.24	Glyoxylate and dicarboxylate metabolism	1	-1000	1000	0		4.1.3.24
R00470	4-hydroxy-2-oxoglutarate glyoxylate-lyase (pyruvate-forming)	C01127[c] <=> C00022[c] + C00048[c]	MCA0038	MCA0038	4.1.3.16	Glyoxylate and dicarboxylate metabolism	1	-1000	1000	0		4.1.3.16
R00451	meso-2,6-diaminoheptanedioate carboxy-lyase (L-lysine-forming)	C00680[c] -> C00011[c] + C00047[c]	MCA0858	MCA0858	4.1.1.20	Lysine biosynthesis	0	0	1000	0		4.1.1.20
R00430	GTP:pyruvate 2-O-phosphotransferase	C00022[c] + C00044[c] <=> C00035[c] + C00074[c]	MCA2597	MCA2597	2.7.1.40	Purine metabolism	1	-1000	1000	0		2.7.1.40
R00429	ATP:GTP 3'-diphosphotransferase	C00002[c] + C00044[c] -> C00020[c] + C04494[c]	MCA1920	MCA1920	2.7.6.5	Purine metabolism	0	0	1000	0		2.7.6.5
R00428	GTP 8,9-hydrolase	C00001[c] + C00044[c] -> C05922[c]	MCA1670 or MCA2318	MCA1670,MCA2318	3.5.4.16	Folate biosynthesis	0	0	1000	0		3.5.4.16
R00426	GTP diphosphohydrolase (diphosphate-forming);	C00001[c] + C00044[c] <=> C00013[c] + C00144[c]	MCA0046	MCA0046	3.6.1.8, 3.6.1.-	Purine metabolism	1	-1000	1000	0		3.6.1.8, 3.6.1.-
R00425	GTP 7,8-8,9-dihydrolase (diphosphate-forming)	3 C00001[c] + C00044[c] -> C00013[c] + C00058[c] + C01304[c]	MCA1656	MCA1656	3.5.4.25	Riboflavin metabolism	0	0	1000	0		3.5.4.25
R00424	GTP 7,8-8,9-dihydrolase	C00001[c] + C00044[c] -> C04895[c] + C00058[c]	MCA1670 or MCA2318	MCA1670,MCA2318	3.5.4.16	Folate biosynthesis	0	0	1000	0		3.5.4.16
R00418	UDP-N-acetyl-D-glucosamine 4-epimerase	C00043[c] -> C00203[c]	MCA0612 or MCA2451	MCA0612,MCA2451	5.1.3.2	Amino sugar and nucleotide sugar metabolism	0	0	1000	0		5.1.3.2
R00416	UTP:N-acetyl-alpha-D-glucosamine-1-phosphate uridylyltransferase	C00075[c] + C04501[c] -> C00013[c] + C00043[c]	MCA0014	MCA0014	2.7.7.23	Amino sugar and nucleotide sugar metabolism	0	0	1000	0		2.7.7.23
R00405	Succinate:CoA ligase (ADP-forming)	C00002[c] + C00010[c] + C00042[c] -> C00008[c] + C00009[c] + C00091[c]	MCA0967 and MCA0968	MCA0967,MCA0968	6.2.1.5	Citrate cycle (TCA cycle)	0	0	1000	0		6.2.1.5
R00401	alanine racemase	C00041[c] <=> C00133[c]	MCA1734	MCA1734	5.1.1.1	D-Alanine metabolism	1	-1000	1000	0		5.1.1.1
R00396	L-alanine:NAD+ oxidoreductase (deaminating)	C00001[c] + C00003[c] + C00041[c] <=> C00080[c] + C00004[c] + C00022[c] + C00014[c]	MCA0563	MCA0563	1.4.1.1	Alanine, aspartate and glutamate metabolism	1	-1000	1000	0		1.4.1.1
R00372	Glycine:2-oxoglutarate aminotransferase	C00037[c] + C00026[c] <=> C00025[c] + C00048[c]	MCA1406	MCA1406	2.6.1.44	Glycine, serine and threonine metabolism	1	-1000	1000	0		2.6.1.44
R00369	L-Alanine:glyoxylate aminotransferase	C00041[c] + C00048[c] -> C00037[c] + C00022[c]	MCA1406	MCA1406	2.6.1.44	Alanine, aspartate and glutamate metabolism	0	0	1000	0		2.6.1.44
R00357	L-Aspartic acid:oxygen oxidoreductase (deaminating)	C00001[c] + C00007[c] + C00049[c] -> C00014[c] + C00027[c] + C00036[c]	MCA1472	MCA1472	1.4.3.16	Alanine, aspartate and glutamate metabolism	0	0	1000	0		1.4.3.16
R00355	L-Aspartate:2-oxoglutarate aminotransferase	C00026[c] + C00049[c] <=> C00025[c] + C00036[c]	MCA2202	MCA2202	2.6.1.1	Arginine biosynthesis	1	-1000	1000	0		2.6.1.1
R00351	acetyl-CoA:oxaloacetate C-acetyltransferase (thioester-hydrolysing)	C00010[c] + C00158[c] <=> C00001[c] + C00024[c] + C00036[c]	MCA0847	MCA0847	2.3.3.16	Citrate cycle (TCA cycle)	1	-1000	1000	0		2.3.3.16
R00342	(S)-malate:NAD+ oxidoreductase	C00003[c] + C00149[c] <=> C00080[c] + C00004[c] + C00036[c]	MCA0610	MCA0610	1.1.1.37	Citrate cycle (TCA cycle)	1	-1000	1000	0		1.1.1.37
R00336	guanosine-3',5'-bis(diphosphate) 3'-diphosphohydrolase	C00001[c] + C01228[c] <=> C00013[c] + C00035[c]	MCA2023	MCA2023	3.1.7.2	Purine metabolism	1	-1000	1000	0		3.1.7.2
R00332	ATP:GMP phosphotransferase	C00002[c] + C00144[c] -> C00008[c] + C00035[c]	MCA2975	MCA2975	2.7.4.8	Purine metabolism	0	0	1000	0		2.7.4.8
R00330	ATP:GDP phosphotransferase	C00002[c] + C00035[c] -> C00008[c] + C00044[c]	MCA2886	MCA2886	2.7.4.6	Purine metabolism	0	0	1000	0		2.7.4.6
R00317	Acetyl phosphate phosphohydrolase	C00001[c] + C00227[c] -> C00009[c] + C00033[c]	MCA0713	MCA0713	3.6.1.7	Pyruvate metabolism	0	0	1000	0		3.6.1.7
R00316	ATP:acetate adenylyltransferase	C00002[c] + C00033[c] -> C00013[c] + C05993[c]	MCA2043	MCA2043	6.2.1.1	Pyruvate metabolism	0	0	1000	0		6.2.1.1
R00315	ATP:acetate phosphotransferase	C00008[c] + C00227[c] -> C00002[c] + C00033[c]	MCA1589	MCA1589	2.7.2.1	Taurine and hypotaurine metabolism	0	0	1000	0		2.7.2.1
R00310	protoheme ferro-lyase (protoporphyrin-forming)	C14818[c] + C02191[c] -> 2 C00080[c] + C00032[c]	MCA1671	MCA1671	4.99.1.1	Porphyrin and chlorophyll metabolism	0	0	1000	0		4.99.1.1
R00299	ATP:D-glucose 6-phosphotransferase	C00002[c] + C00031[c] -> C00008[c] + C00092[c]	MCA0561	MCA0561	2.7.1.2	Starch and sucrose metabolism	0	0	1000	0		2.7.1.2
R00294	nitrous-oxide:ferricytochrome-c oxidoreductase	2 C00080[c] + 2 C00126[c] + 2 C00533[c] -> C00001[c] + 2 C00125[c] + C00887[c]	MCA2400 and MCA2401	MCA2400,MCA2401	1.7.2.5	Nitrogen metabolism	0	0	1000	0		1.7.2.5
R00291	UDP-glucose 4-epimerase;	C00029[c] <=> C00052[c]	MCA0612 or MCA2451	MCA0612,MCA2451	5.1.3.2	Galactose metabolism	1	-1000	1000	0		5.1.3.2
R00289	UTP:alpha-D-glucose-1-phosphate uridylyltransferase	C00103[c] + C00075[c] -> C00013[c] + C00029[c]	MCA2203	MCA2203	2.7.7.9	Pentose and glucuronate interconversions	0	0	1000	0		2.7.7.9
R00287	UDP-glucose glucophosphohydrolase	C00001[c] + C00029[c] -> C00103[c] + C00105[c]	MCA0046	MCA0046	3.6.1.8, 3.6.1.9	Pyrimidine metabolism	0	0	1000	0		3.6.1.8, 3.6.1.9
R00286	UDP-glucose:NAD+ 6-oxidoreductase	C00001[c] + 2 C00003[c] + C00029[c] <=> 2 C00080[c] + 2 C00004[c] + C00167[c]	MCA2487	MCA2487	1.1.1.22	Pentose and glucuronate interconversions	1	-1000	1000	0		1.1.1.22
R00274	glutathione:hydrogen-peroxide oxidoreductase	C00027[c] + 2 C00051[c] -> 2 C00001[c] + C00127[c]	MCA0841	MCA0841	1.11.1.9	Glutathione metabolism	0	0	1000	0		1.11.1.9
R00271	acetyl-CoA:2-oxoglutarate C-acetyltransferase (thioester-hydrolysing, carboxymethyl forming)	C00001[c] + C00024[c] + C00026[c] -> C00010[c] + C01251[c]	MCA0214	MCA0214	2.3.3.14	Lysine biosynthesis	0	0	1000	0		2.3.3.14
R00260	glutamate racemase	C00025[c] <=> C00217[c]	MCA1276	MCA1276	5.1.1.3	D-Glutamine and D-glutamate metabolism	1	-1000	1000	0		5.1.1.3
R00259	acetyl-CoA:L-glutamate N-acetyltransferase	C00024[c] + C00025[c] -> C00010[c] + C00624[c]	MCA1679 and MCA2084	MCA1679,MCA2084	2.3.1.1	Arginine biosynthesis	0	0	1000	0		2.3.1.1
R00257	Deamido-NAD+:L-glutamine amido-ligase (AMP-forming)	C00001[c] + C00002[c] + C00064[c] + C00857[c] -> C00013[c] + C00003[c] + C00025[c] + C00020[c]	MCA0969	MCA0969	6.3.5.1	Nicotinate and nicotinamide metabolism	0	0	1000	0		6.3.5.1
R00256	L-glutamine amidohydrolase	C00001[c] + C00064[c] -> C00025[c] + C00014[c]	MCA0472 or MCA0542 or MCA2127	MCA0472,MCA0542,MCA2127	1.4.1.13, 1.4.7.1	Arginine biosynthesis	0	0	1000	0		1.4.1.13, 1.4.7.1
R00253	L-Glutamate:ammonia ligase (ADP-forming)	C00002[c] + C00025[c] + C00014[c] -> C00008[c] + C00009[c] + C00064[c]	MCA1677	MCA1677	6.3.1.2	Arginine biosynthesis	0	0	1000	0		6.3.1.2
R00248	L-Glutamate:NADP+ oxidoreductase (deaminating)	C00001[c] + C00006[c] + C00025[c] <=> C00080[c] + C00005[c] + C00026[c] + C00014[c]	MCA1030	MCA1030	1.4.1.3, 1.4.1.13	Arginine biosynthesis	1	-1000	1000	0		1.4.1.3, 1.4.1.13
R00243	L-glutamate:NAD+ oxidoreductase (deaminating)	C00001[c] + C00003[c] + C00025[c] <=> C00080[c] + C00004[c] + C00026[c] + C00014[c]	MCA1684	MCA1684	1.4.1.2, 1.4.1.3	Arginine biosynthesis	1	-1000	1000	0		1.4.1.2, 1.4.1.3
R00239	ATP:L-glutamate 5-phosphotransferase	C00002[c] + C00025[c] -> C00008[c] + C03287[c]	MCA2249	MCA2249	2.7.2.11	Arginine and proline metabolism	0	0	1000	0		2.7.2.11
R00236	acetyl adenylate:CoA acetyltransferase	C00010[c] + C05993[c] <=> C00024[c] + C00020[c]	MCA2043	MCA2043	6.2.1.1	Pyruvate metabolism	1	-1000	1000	0		6.2.1.1
R00235	Acetate:CoA ligase (AMP-forming)	C00002[c] + C00010[c] + C00033[c] -> C00013[c] + C00024[c] + C00020[c]	MCA2043	MCA2043	6.2.1.1	Glycolysis / Gluconeogenesis	0	0	1000	0		6.2.1.1
R00226	pyruvate:pyruvate acetaldehydetransferase (decarboxylating);	2 C00022[c] <=> C00011[c] + C06010[c]	(MCA1837 or MCA2270) and MCA2271	MCA1837,MCA2270,MCA2271	2.2.1.6	Valine, leucine and isoleucine biosynthesis	1	-1000	1000	0		2.2.1.6
R00220	L-serine ammonia-lyase	C00065[c] <=> C00022[c] + C00014[c]	MCA0354	MCA0354	4.3.1.19	Glycine, serine and threonine metabolism	1	-1000	1000	0		4.3.1.19
R00217	oxaloacetate carboxy-lyase (pyruvate-forming)	C00036[c] -> C00011[c] + C00022[c]	MCA2479 and MCA2480 and MCA2481	MCA2479,MCA2480,MCA2481	1.1.1.38, 4.1.1.3	Pyruvate metabolism	0	0	1000	0		1.1.1.38, 4.1.1.3
R00214	(S)-malate:NAD+ oxidoreductase (decarboxylating)	C00003[c] + C00149[c] <=> C00080[c] + C00011[c] + C00004[c] + C00022[c]	MCA1836	MCA1836	1.1.1.38	Pyruvate metabolism	1	-1000	1000	0		1.1.1.38
R00209	pyruvate:NAD+ 2-oxidoreductase (CoA-acetylating);	C00003[c] + C00010[c] + C00022[c] <=> C00080[c] + C00011[c] + C00004[c] + C00024[c]	MCA3000 and MCA3002 and MCA3001	MCA3000,MCA3002,MCA3001	1.2.4.1, 1.8.1.4, 2.3.1.12	Metabolic pathways	1	-1000	1000	0		1.2.4.1, 1.8.1.4, 2.3.1.12
R00206	ATP:pyruvate,phosphate phosphotransferase	C00009[c] + C00002[c] + C00022[c] -> C00013[c] + C00020[c] + C00074[c]	MCA3020	MCA3020	2.7.9.1	Pyruvate metabolism	0	0	1000	0		2.7.9.1
R00200	ATP:pyruvate 2-O-phosphotransferase	C00002[c] + C00022[c] -> C00008[c] + C00074[c]	MCA2597	MCA2597	2.7.1.40	Glycolysis / Gluconeogenesis	0	0	1000	0		2.7.1.40
R00194	S-Adenosyl-L-homocysteine homocysteinylribohydrolase	C00001[c] + C00021[c] -> C00147[c] + C03539[c]	MCA0811	MCA0811	3.2.2.9	Cysteine and methionine metabolism	0	0	1000	0		3.2.2.9
R00192	S-Adenosyl-L-homocysteine hydrolase	C00001[c] + C00021[c] -> C00155[c] + C00212[c]	MCA0138	MCA0138	3.3.1.1	Cysteine and methionine metabolism	0	0	1000	0		3.3.1.1
R00190	AMP:diphosphate phospho-D-ribosyltransferase	C00013[c] + C00020[c] <=> C00119[c] + C00147[c]	MCA0816	MCA0816	2.4.2.7, 2.4.2.8	Purine metabolism	1	-1000	1000	0		2.4.2.7, 2.4.2.8
R00185	ATP:adenosine 5'-phosphotransferase	C00002[c] + C00212[c] -> C00008[c] + C00020[c]	MCA0047	MCA0047	2.7.1.20	Purine metabolism	0	0	1000	0		2.7.1.20
R00183	adenosine 5'-monophosphate phosphohydrolase	C00001[c] + C00020[c] -> C00009[c] + C00212[c]	MCA0448 or MCA1322 or MCA2418 or MCA2982	MCA0448,MCA1322,MCA2418,MCA2982	3.1.3.5	Purine metabolism	0	0	1000	0		3.1.3.5
R00178	S-adenosyl-L-methionine carboxy-lyase [(5-deoxy-5-adenosyl)(3-aminopropyl)methylsulfonium-forming]	C00080[c] + C00019[c] -> C00011[c] + C01137[c]	MCA1749	MCA1749	4.1.1.50	Cysteine and methionine metabolism	0	0	1000	0		4.1.1.50
R00177	ATP:L-methionine S-adenosyltransferase	C00001[c] + C00002[c] + C00073[c] -> C00009[c] + C00013[c] + C00019[c]	MCA0139 or MCA0450	MCA0139,MCA0450	2.5.1.6	Cysteine and methionine metabolism	0	0	1000	0		2.5.1.6
R00161	ATP:FMN adenylyltransferase	C00002[c] + C00061[c] -> C00013[c] + C00016[c]	MCA2252	MCA2252	2.7.7.2	Riboflavin metabolism	0	0	1000	0		2.7.7.2
R00158	ATP:UMP phosphotransferase	C00002[c] + C00105[c] -> C00008[c] + C00015[c]	MCA1414 or MCA0569	MCA1414,MCA0569	2.7.4.22	Pyrimidine metabolism	0	0	1000	0		2.7.4.22
R00156	ATP:UDP phosphotransferase	C00002[c] + C00015[c] -> C00008[c] + C00075[c]	MCA2886	MCA2886	2.7.4.6	Pyrimidine metabolism	0	0	1000	0		2.7.4.6
R00149	Carbon-dioxide:ammonia ligase (ADP-forming,carbamate-phosphorylating)	C00001[c] + C00011[c] + 2 C00002[c] + C00014[c] -> 2 C00008[c] + C00009[c] + C00169[c]			6.3.4.16	Arginine biosynthesis	0	0	1000	0		6.3.4.16
R00148	ammonia,ubiquinol:oxygen oxidoreductase;	C00007[c] + C00014[c] + C00390[c] -> C00001[c] + C00192[c] + C00399[c]	(MCA1796 or MCA2853) and (MCA1797 or MCA2854) and (MCA1798 or MCA2855 or MCA0295)	MCA1796,MCA2853,MCA1797,MCA2854,MCA1798,MCA2855,MCA0295	1.14.99.39	Nitrogen metabolism	0	0	1000	0		1.14.99.39
R00139	ATP:2'-deoxy-5-hydroxymethylcytidine-5'-diphosphate phosphotransferase	C00002[c] + C11038[c] -> C00008[c] + C11039[c]	MCA2886	MCA2886	2.7.4.6	Pyrimidine metabolism	0	0	1000	0		2.7.4.6
R00137	ATP:nicotinamide-nucleotide adenylyltransferase	C00002[c] + C00455[c] -> C00013[c] + C00003[c]	MCA1879	MCA1879	2.7.7.1, 2.7.7.18	Nicotinate and nicotinamide metabolism	0	0	1000	0		2.7.7.1, 2.7.7.18
R00132	carbonate hydro-lyase (carbon-dioxide-forming);	C01353[c] -> C00001[c] + C00011[c]	MCA0910 or MCA1080 or MCA1442 or MCA1665	MCA0910,MCA1080,MCA1442,MCA1665	4.2.1.1	Nitrogen metabolism	0	0	1000	0		4.2.1.1
R00130	ATP:dephospho-CoA 3'-phosphotransferase	C00002[c] + C00882[c] -> C00008[c] + C00010[c]	MCA2093	MCA2093	2.7.1.24	Pantothenate and CoA biosynthesis	0	0	1000	0		2.7.1.24
R00127	ATP:AMP phosphotransferase	C00002[c] + C00020[c] -> 2 C00008[c]	MCA2066	MCA2066	2.7.4.3	Purine metabolism	0	0	1000	0		2.7.4.3
R00125	P1,P4-bis(5'-adenosyl)-tetraphosphate nucleotidebisphosphohydrolase	C00001[c] + C01260[c] -> 2 C00008[c]	MCA0159	MCA0159	3.6.1.41	Purine metabolism	0	0	1000	0		3.6.1.41
R00114	L-Glutamate:NADP+ oxidoreductase (transaminating)	C00080[c] + C00005[c] + C00026[c] + C00064[c] -> C00006[c] + 2 C00025[c]	MCA2039 and MCA2040	MCA2039,MCA2040	1.4.1.13	Alanine, aspartate and glutamate metabolism	0	0	1000	0		1.4.1.13
R00112	NADPH:NAD+ oxidoreductase	C00005[c] + C00003[c] <=> C00006[c] + C00004[c]	MCA2767 and MCA2768	MCA2767,MCA2768	1.6.1.2	Nicotinate and nicotinamide metabolism	1	-1000	1000	0		1.6.1.2
R00104	ATP:NAD+ 2'-phosphotransferase	C00003[c] + C00002[c] -> C00008[c] + C00006[c]	MCA1859	MCA1859	2.7.1.23	Nicotinate and nicotinamide metabolism	0	0	1000	0		2.7.1.23
R00093	L-glutamate:NAD+ oxidoreductase (transaminating)	C00003[c] + 2 C00025[c] -> C00080[c] + C00004[c] + C00026[c] + C00064[c]	MCA2039 and MCA2040	MCA2039,MCA2040	1.4.1.14	Alanine, aspartate and glutamate metabolism	0	0	1000	0		1.4.1.14
R00087	ATP diphosphohydrolase (diphosphate-forming);	C00001[c] + C00002[c] -> C00013[c] + C00020[c]	MCA0046	MCA0046	3.6.1.8, 3.6.1.9	Purine metabolism	0	0	1000	0		3.6.1.8, 3.6.1.9
R00086	ATP phosphohydrolase	C00001[c] + C00002[c] -> C00008[c] + C00009[c]	MCA0046	MCA0046	3.6.1.3, 3.6.1.8, 3.6.1.15	Purine metabolism	0	0	1000	0		3.6.1.3, 3.6.1.8, 3.6.1.15
R00084	porphobilinogen:(4-[2-carboxyethyl]-3-[carboxymethyl]pyrrol-2-yl)methyltransferase (hydrolysing);	C00001[c] + 4 C00931[c] -> 4 C00014[c] + C01024[c]	MCA3060	MCA3060	2.5.1.61	Porphyrin and chlorophyll metabolism	0	0	1000	0		2.5.1.61
R00082	Ferrocytochrome c2:oxygen oxidoreductase	C00007[c] + 4 C01000[c] -> 2 C00001[c] + 4 C00997[c]	(MCA0880 or MCA2396) and (MCA2397 or MCA0879) and MCA0883	MCA0880,MCA2396,MCA2397,MCA0879,MCA0883	1.9.3.1	Oxidative phosphorylation	0	0	1000	0		1.9.3.1
R00078	Fe(II):oxygen oxidoreductase;	4 C00080[c] + C00007[c] + 4 C14818[c] -> 2 C00001[c] + 4 C14819[c]	MCA0762 or MCA1369	MCA0762,MCA1369	1.16.3.1	Porphyrin and chlorophyll metabolism	0	0	1000	0		1.16.3.1
R00066	6,7-Dimethyl-8-(1-D-ribityl)lumazine:6,7-dimethyl-8-(1-D-ribityl)lumazine 2,3-butanediyltransferase	2 C04332[c] -> C04732[c] + C00255[c]	MCA1657 or MCA1865	MCA1657,MCA1865	2.5.1.9	Riboflavin metabolism	0	0	1000	0		2.5.1.9
R00036	5-aminolevulinate hydro-lyase (adding 5-aminolevulinate and cyclizing; porphobilinogen-forming)	2 C00430[c] -> 2 C00001[c] + C00931[c]	MCA2793	MCA2793	4.2.1.24	Porphyrin and chlorophyll metabolism	0	0	1000	0		4.2.1.24
R00028	maltose glucohydrolase	C00001[c] + C00208[c] <=> 2 C00267[c]	MCA0942	MCA0942	3.2.1.20	Starch and sucrose metabolism	1	-1000	1000	0		3.2.1.20
R00026	cellobiose glucohydrolase	C00001[c] + C00185[c] -> 2 C00221[c]	MCA1578	MCA1578	3.2.1.21	Cyanoamino acid metabolism	0	0	1000	0		3.2.1.21
R00022	chitobiose N-acetylglucosaminohydrolase	C00001[c] + C01674[c] -> 2 C00140[c]	MCA1984	MCA1984	3.2.1.52	Amino sugar and nucleotide sugar metabolism	0	0	1000	0		3.2.1.52
R00014	pyruvate:thiamin diphosphate acetaldehydetransferase (decarboxylating)	C00022[c] + C00068[c] -> C00011[c] + C05125[c]	MCA3000	MCA3000	1.2.4.1, 2.2.1.6	Glycolysis / Gluconeogenesis	0	0	1000	0		1.2.4.1, 2.2.1.6
R00006	pyruvate:pyruvate acetaldehydetransferase (decarboxylating);	2 C00022[c] -> C00011[c] + C00900[c]	(MCA1837 or MCA2270) and MCA2271	MCA1837,MCA2270,MCA2271	2.2.1.6	Pantothenate and CoA biosynthesis	0	0	1000	0		2.2.1.6
R00004	diphosphate phosphohydrolase;	C00001[c] + C00013[c] <=> 2 C00009[c]	MCA0112 or MCA1188 or MCA1252	MCA0112,MCA1188,MCA1252	3.6.1.1	Oxidative phosphorylation	1	-1000	1000	0		3.6.1.1
R_formylTHMPT_formate		C00001[c] + C01274[c] -> C00080[c] + C01217[c] + C00058[c]				Methane metabolism	0	0	1000	0
NADH_DH_ubi	Cytochrome C Oxidase Complex	4 C00080[c] + C00004[c] + C00399[c] -> C00003[c] + C00390[c] + 3 C00080[p]	MCA1918	MCA1918		Oxidative phosphorylation	0	0	1000	0
Maintenance_ATP	ATPase Maintenance Reaction	C00001[c] + C00002[c] -> C00008[c] + C00009[c] + C00080[c]		MCA0006, MCA0007,MCA0008,MCA0009,MCA0010 MCA0011,MCA0012,MCA0013,MCA1556,MCA1557,MCA2699, MCA2700,MCA2701,MCA2707,MCA2708,MCA3021		Oxidative phosphorylation	0	8.35	8.35	0
Cytochrome_c_oxidase	Cytochrome C Oxidase Complex	2 C00080[c] + 0.5 C00007[c] + C00390[c] -> C00001[c] + C00399[c] + 2 C00080[p]		MCA0879, MCA0880, MCA0883, MCA2396, MCA2397		Oxidative phosphorylation	0	0	1000	0
Biomass_reaction	Biomass Reaction	59.81 C00001[c] + 0.0604 C00063[c] + 0.0236 C08362[c] + 0.00080136 C00005[c] + 0.00080136 C00006[c] + 0.0045 CPG161161[c] + 0.072 C06424[c] + 0.0022 CPG161140[c] + 0.0075 C00249[c] + 0.0083 CPG160161[c] + 0.27727 C00065[c] + 0.0385 CPE161161[c] + 0.0087 CPE161140[c] + 0.0416 CPE160161[c] + 0.0001763 C00019[c] + 0.003 CPC161161[c] + 0.0031 CPC161140[c] + 0.003 CPC160161[c] + 0.0024041 C00085[c] + …					0	0	1000	1
ATPSynth	ATP Synthase	C00008[c] + C00009[c] + 4 C00080[p] -> C00001[c] + 3 C00080[c] + C00002[c]		MCA0006, MCA0007,MCA0008,MCA0009,MCA0010 MCA0011,MCA0012,MCA0013,MCA1556,MCA1557,MCA2699, MCA2700,MCA2701,MCA2707,MCA2708,MCA3021		Oxidative phosphorylation	0	0	1000	0
ATPase	ATPase	C00001[c] + C00002[c] -> C00008[c] + C00009[c] + C00080[c]		MCA0006, MCA0007,MCA0008,MCA0009,MCA0010 MCA0011,MCA0012,MCA0013,MCA1556,MCA1557,MCA2699, MCA2700,MCA2701,MCA2707,MCA2708,MCA3021		Oxidative phosphorylation	0	0	1000	0
R08159		C00001[c] + C05761[c] <=> C06424[c] + C00229[c]				Fatty acid biosynthesis	1	-1000	1000	0
R03370		2 C00080[c] + C00007[c] + 2 C00138[c] + C04088[c] <=> 2 C00001[c] + 2 C00139[c] + C01203[c]				Fatty acid biosynthesis	1	-1000	1000	0
R02814		C00001[c] + C01203[c] <=> C00712[c] + C00229[c]				Fatty acid biosynthesis	1	-1000	1000	0
R00258		C00041[c] + C00026[c] -> C00022[c] + C00025[c]			2.6.1.2	Arginine biosynthesis	0	0	1000	0		2.6.1.2
R00485		C00152[c] + C00001[c] -> C00049[c] + C00014[c]				Alanine, aspartate and glutamate metabolism	0	0	1000	0
R00576		C00064[c] + C00022[c] -> C00940[c] + C00041[c]			2.6.1.15	Alanine, aspartate and glutamate metabolism	0	0	1000	0		2.6.1.15
R01215		C00183[c] + C00022[c] <=> C00141[c] + C00041[c]			2.6.1.66	Valine, leucine and isoleucine biosynthesis	1	-1000	1000	0		2.6.1.66
R00345	phosphate:oxaloacetate carboxy-lyase (adding phosphate;phosphoenolpyruvate-forming);	C00001[c] + C00011[c] + C00074[c] -> C00009[c] + C00036[c]			4.1.1.31	Pyruvate metabolism	0	0	1000	0		4.1.1.31
EX_Pyr	Exchange Reaction	C00022[e] <=>				Exchange Reactions	1	0	1000	0
EX_Pi	Exchange Reaction	C00009[e] <=>				Exchange Reactions	1	-1000	1000	0
EX_O2	Exchange Reaction	C00007[e] <=>				Exchange Reactions	1	-1000	1000	0
EX_nitrite	Exchange Reaction	C00088[e] <=>				Exchange Reactions	1	-1000	0	0
EX_nitrate	Exchange Reaction	C00244[e] <=>				Exchange Reactions	1	0	0	0
EX_NH3	Exchange Reaction	C00014[e] <=>				Exchange Reactions	1	0	0	0
EX_N2	Exchange Reaction	C00697[e] <=>				Exchange Reactions	1	0	1000	0
EX_Lact	Exchange Reaction	C00256[e] <=>				Exchange Reactions	1	0	1000	0
EX_Heme	Exchange Reaction	C00032[e] <=>				Exchange Reactions	1	-1000	1000	0
EX_H2O	Exchange Reaction	C00001[e] <=>				Exchange Reactions	1	-1000	1000	0
EX_H	Exchange Reaction	C00080[c] <=>				Exchange Reactions	1	-1000	1000	0
EX_Formate	Exchange Reaction	C00058[e] <=>				Exchange Reactions	1	0	1000	0
EX_EtOH	Exchange Reaction	C00469[e] <=>				Exchange Reactions	1	0	1000	0
EX_CO2	Exchange Reaction	C00011[e] <=>				Exchange Reactions	1	0	1000	0
EX_CH4	Exchange Reaction	C01438[e] <=>				Exchange Reactions	1	0	1000	0
EX_C00305	Exchange Reaction	C00305[e] <=>				Exchange Reactions	1	-1000	1000	0
EX_C00175	Exchange Reaction	C00175[e] <=>				Exchange Reactions	1	-1000	1000	0
EX_C00076	Exchange Reaction	C00076[e] <=>				Exchange Reactions	1	-1000	1000	0
EX_C00070	Exchange Reaction	C00070[e] <=>				Exchange Reactions	1	-1000	1000	0
EX_C00023	Exchange Reaction	C00023[e] <=>				Exchange Reactions	1	-1000	1000	0
EX_Ac	Exchange Reaction	C00033[e] <=>				Exchange Reactions	1	0	1000	0
EX_sulfate	Exchange Reaction	C00059[e] <=>				Exchange Reactions	1	-1000	1000	0
EX_Suc	Exchange Reaction	C00042[e] <=>				Exchange Reactions	1	0	1000	0
CCL160161_tx	Transport Reaction	1.0 CCL160161[e] <=> 1.0 CCL160161[c]				Transport Reactions	1	-1000	1000	0
CCL161140_tx	Transport Reaction	1.0 CCL161140[e] <=> 1.0 CCL161140[c]				Transport Reactions	1	-1000	1000	0
CCL161161_tx	Transport Reaction	1.0 CCL161161[e] <=> 1.0 CCL161161[c]				Transport Reactions	1	-1000	1000	0
CPC160161_tx	Transport Reaction	1.0 CPC160161[e] <=> 1.0 CPC160161[c]				Transport Reactions	1	-1000	1000	0
CPC161140_tx	Transport Reaction	1.0 CPC161140[e] <=> 1.0 CPC161140[c]				Transport Reactions	1	-1000	1000	0
CPC161161_tx	Transport Reaction	1.0 CPC161161[e] <=> 1.0 CPC161161[c]				Transport Reactions	1	-1000	1000	0
CPE160161_tx	Transport Reaction	1.0 CPE160161[e] <=> 1.0 CPE160161[c]				Transport Reactions	1	-1000	1000	0
CPE161140_tx	Transport Reaction	1.0 CPE161140[e] <=> 1.0 CPE161140[c]				Transport Reactions	1	-1000	1000	0
CPE161161_tx	Transport Reaction	1.0 CPE161161[e] <=> 1.0 CPE161161[c]				Transport Reactions	1	-1000	1000	0
CPG160161_tx	Transport Reaction	1.0 CPG160161[e] <=> 1.0 CPG160161[c]				Transport Reactions	1	-1000	1000	0
CPG161140_tx	Transport Reaction	1.0 CPG161140[e] <=> 1.0 CPG161140[c]				Transport Reactions	1	-1000	1000	0
CPG161161_tx	Transport Reaction	1.0 CPG161161[e] <=> 1.0 CPG161161[c]				Transport Reactions	1	-1000	1000	0
lipooligosaccharides_tx	Transport Reaction	1.0 C06706[e] + 1.0 C00002[c] + 1.0 C00001[c] <=> 1.0 C00008[c] + 1.0 C00009[c] + 1.0 C00080[c] + 1.0 C06706[c]				Transport Reactions	1	-1000	1000	0
lps_tx	Transport Reaction	1.0 C06025[e] + 1.0 C00002[c] + 1.0 C00001[c] <=> 1.0 C00008[c] + 1.0 C00009[c] + 1.0 C00080[c] + 1.0 C06025[c]				Transport Reactions	1	-1000	1000	0
putresine_tx	Transport Reaction	1.0 C00134[e] <=> 1.0 C00134[c]				Transport Reactions	1	-1000	1000	0
spermidine_tx	Transport Reaction	1.0 C00315[e] <=> 1.0 C00315[c]				Transport Reactions	1	-1000	1000	0
Urea_tx	Transport Reaction	1.0 C00086[e] + 1.0 C00002[c] + 1.0 C00001[c] <=> 1.0 C00008[c] + 1.0 C00009[c] + 1.0 C00080[c] + 1.0 C00086[c]				Transport Reactions	1	-1000	1000	0
Formate_tx_pc	Transport Reaction	1.0 C00058[c] <=> 1.0 C00058[p]				Transport Reactions	1	-1000	1000	0
Formate_tx_ep	Transport Reaction	1.0 C00058[p] <=> 1.0 C00058[e]				Transport Reactions	1	-1000	1000	0
Pyr_tx_pc	Transport Reaction	C00022[c] <=> C00022[p]				Transport Reactions	1	-1000	1000	0
Pyr_tx_ep	Transport Reaction	C00022[p] <=> C00022[e]				Transport Reactions	1	-1000	1000	0
Pi_tx_pc	Transport Reaction	C00009[c] <=> C00009[p]				Transport Reactions	1	-1000	1000	0
Pi_tx_ec	Transport Reaction	C00009[p] <=> C00009[e]				Transport Reactions	1	-1000	1000	0
O2_tx_pc	Transport Reaction	C00007[c] <=> C00007[p]				Transport Reactions	1	-1000	1000	0
O2_tx_ep	Transport Reaction	C00007[p] <=> C00007[e]				Transport Reactions	1	-1000	1000	0
nitrite_pc	Transport Reaction	C00088[c] <=> C00088[p]				Transport Reactions	1	-1000	1000	0
nitrite_ep	Transport Reaction	C00088[p] <=> C00088[e]				Transport Reactions	1	-1000	1000	0
nitrate_pc	Transport Reaction	C00244[c] <=> C00244[p]				Transport Reactions	1	-1000	1000	0
nitrate_ep	Transport Reaction	C00244[p] <=> C00244[e]				Transport Reactions	1	-1000	1000	0
NH3_tx_pc	Transport Reaction	C00014[c] <=> C00014[p]				Transport Reactions	1	-1000	1000	0
NH3_tx_ep	Transport Reaction	C00014[p] <=> C00014[e]				Transport Reactions	1	-1000	1000	0
N2_tx_pc	Transport Reaction	C00697[c] <=> C00697[p]				Transport Reactions	1	-1000	1000	0
N2_tx_ep	Transport Reaction	C00697[p] <=> C00697[e]				Transport Reactions	1	-1000	1000	0
Lact_tx_pc	Transport Reaction	C00256[c] <=> C00256[p]				Transport Reactions	1	-1000	1000	0
Lact_tx_ep	Transport Reaction	C00256[p] <=> C00256[e]				Transport Reactions	1	-1000	1000	0
Heme_tx_pc	Transport Reaction	C00032[c] <=> C00032[p]				Transport Reactions	1	-1000	1000	0
Heme_tx_ep	Transport Reaction	C00032[p] <=> C00032[e]				Transport Reactions	1	-1000	1000	0
H2O_tx_pc	Transport Reaction	C00001[c] <=> C00001[p]				Transport Reactions	1	-1000	1000	0
H2O_tx_ep	Transport Reaction	C00001[p] <=> C00001[e]				Transport Reactions	1	-1000	1000	0
EtOH_tx_pc	Transport Reaction	C00469[c] <=> C00469[p]				Transport Reactions	1	-1000	1000	0
EtOH_tx_ep	Transport Reaction	C00469[p] <=> C00469[e]				Transport Reactions	1	-1000	1000	0
CO2_tx_pc	Transport Reaction	C00011[c] <=> C00011[p]				Transport Reactions	1	-1000	1000	0
CO2_tx_ep	Transport Reaction	C00011[p] <=> C00011[e]				Transport Reactions	1	-1000	1000	0
CH4_tx_pc	Transport Reaction	C01438[c] <=> C01438[p]				Transport Reactions	1	-1000	1000	0
CH4_tx_ep	Transport Reaction	C01438[p] <=> C01438[e]				Transport Reactions	1	-1000	1000	0
C00305_tx_pc	Transport Reaction	C00305[c] <=> C00305[p]				Transport Reactions	1	-1000	1000	0
C00305_tx_ep	Transport Reaction	C00305[p] <=> C00305[e]				Transport Reactions	1	-1000	1000	0
C00175_tx_pc	Transport Reaction	C00175[c] <=> C00175[p]				Transport Reactions	1	-1000	1000	0
C00175_tx_ep	Transport Reaction	C00175[p] <=> C00175[e]				Transport Reactions	1	-1000	1000	0
C00076_tx_pc	Transport Reaction	C00076[c] <=> C00076[p]				Transport Reactions	1	-1000	1000	0
C00076_tx_ep	Transport Reaction	C00076[p] <=> C00076[e]				Transport Reactions	1	-1000	1000	0
C00070_tx_pc	Transport Reaction	C00070[c] <=> C00070[p]				Transport Reactions	1	-1000	1000	0
C00070_tx_ep	Transport Reaction	C00070[p] <=> C00070[e]				Transport Reactions	1	-1000	1000	0
C00023_tx_pc	Transport Reaction	C00023[c] <=> C00023[p]				Transport Reactions	1	-1000	1000	0
C00023_tx_ep	Transport Reaction	C00023[p] <=> C00023[e]				Transport Reactions	1	-1000	1000	0
Ac_tx_pc	Transport Reaction	C00033[c] <=> C00033[p]				Transport Reactions	1	-1000	1000	0
Ac_tx_ep	Transport Reaction	C00033[p] <=> C00033[e]				Transport Reactions	1	-1000	1000	0
sulfate_tx_pc	Transport Reaction	C00059[c] <=> C00059[p]				Transport Reactions	1	-1000	1000	0
sulfate_tx_ep	Transport Reaction	C00059[p] <=> C00059[e]				Transport Reactions	1	-1000	1000	0
Suc_tx_pc	Transport Reaction	C00042[c] <=> C00042[p]				Transport Reactions	1	-1000	1000	0
Suc_tx_ep	Transport Reaction	C00042[p] <=> C00042[e]				Transport Reactions	1	-1000	1000	0
EX_CCL160161	Exchange Reaction	1.0 CCL160161[e] <=>				Exchange Reactions	1	0	1000	0
EX_CCL161140	Exchange Reaction	1.0 CCL161140[e] <=>				Exchange Reactions	1	0	1000	0
EX_CCL161161	Exchange Reaction	1.0 CCL161161[e] <=>				Exchange Reactions	1	0	1000	0
EX_CPC160161	Exchange Reaction	1.0 CPC160161[e] <=>				Exchange Reactions	1	0	1000	0
EX_CPC161140	Exchange Reaction	1.0 CPC161140[e] <=>				Exchange Reactions	1	0	1000	0
EX_CPC161161	Exchange Reaction	1.0 CPC161161[e] <=>				Exchange Reactions	1	0	1000	0
EX_CPE160161	Exchange Reaction	1.0 CPE160161[e] <=>				Exchange Reactions	1	0	1000	0
EX_CPE161140	Exchange Reaction	1.0 CPE161140[e] <=>				Exchange Reactions	1	0	1000	0
EX_CPE161161	Exchange Reaction	1.0 CPE161161[e] <=>				Exchange Reactions	1	0	1000	0
EX_CPG160161	Exchange Reaction	1.0 CPG160161[e] <=>				Exchange Reactions	1	0	1000	0
EX_CPG161140	Exchange Reaction	1.0 CPG161140[e] <=>				Exchange Reactions	1	0	1000	0
EX_CPG161161	Exchange Reaction	1.0 CPG161161[e] <=>				Exchange Reactions	1	0	1000	0
EX_lipooligosaccharides	Exchange Reaction	1.0 C06706[e] <=>				Exchange Reactions	1	0	1000	0
EX_lps	Exchange Reaction	1.0 C06025[e] <=>				Exchange Reactions	1	0	1000	0
EX_putresine	Exchange Reaction	1.0 C00134[e] <=>				Exchange Reactions	1	0	1000	0
EX_spermidine	Exchange Reaction	1.0 C00315[e] <=>				Exchange Reactions	1	0	1000	0
EX_Urea	Exchange Reaction	1.0 C00086[e] <=>				Exchange Reactions	1	0	1000	0
alanine_tx	Transport Reaction	1.0 C00041[e] + 1.0 C00002[c] + 1.0 C00001[c] <=> 1.0 C00008[c] + 1.0 C00009[c] + 1.0 C00080[c] + 1.0 C00041[c]				Transport Reactions	1	-1000	1000	0
Aspargine_tx	Transport Reaction	1.0 C00152[e] + 1.0 C00002[c] + 1.0 C00001[c] <=> 1.0 C00008[c] + 1.0 C00009[c] + 1.0 C00080[c] + 1.0 C00152[c]				Transport Reactions	1	-1000	1000	0
Aspartate_tx	Transport Reaction	1.0 C00049[e] + 1.0 C00002[c] + 1.0 C00001[c] <=> 1.0 C00008[c] + 1.0 C00009[c] + 1.0 C00080[c] + 1.0 C00049[c]				Transport Reactions	1	-1000	1000	0
Cysteine_tx	Transport Reaction	1.0 C00097[e] + 1.0 C00002[c] + 1.0 C00001[c] <=> 1.0 C00008[c] + 1.0 C00009[c] + 1.0 C00080[c] + 1.0 C00097[c]				Transport Reactions	1	-1000	1000	0
Glutamate_tx	Transport Reaction	1.0 C00025[e] + 1.0 C00002[c] + 1.0 C00001[c] <=> 1.0 C00008[c] + 1.0 C00009[c] + 1.0 C00080[c] + 1.0 C00025[c]				Transport Reactions	1	-1000	1000	0
Glutamine_tx	Transport Reaction	1.0 C00064[e] + 1.0 C00002[c] + 1.0 C00001[c] <=> 1.0 C00008[c] + 1.0 C00009[c] + 1.0 C00080[c] + 1.0 C00064[c]				Transport Reactions	1	-1000	1000	0
Valine_tx	Transport Reaction	1.0 C00183[e] + 1.0 C00002[c] + 1.0 C00001[c] <=> 1.0 C00008[c] + 1.0 C00009[c] + 1.0 C00080[c] + 1.0 C00183[c]				Transport Reactions	1	-1000	1000	0
mercaptopyruvate_tx	Transport Reaction	C00957[c] <=> C00957[e]				Transport Reactions	1	-1000	1000	0
EX_mercaptopyruvate	Exchange Reaction	C00957[e] <=>				Exchange Reactions	1	0	1000	0
methyloxobutanoicacid_tx	Transport Reaction	C00141[c] <=> C00141[e]				Transport Reactions	1	-1000	1000	0
EX_methyloxobutanoicacid	Exchange Reaction	C00141[e] <=>				Exchange Reactions	1	0	1000	0
OAA_tx	Transport Reaction	C00036[c] <=> C00036[e]				Transport Reactions	1	-1000	1000	0
EX_OAA	Exchange Reaction	C00036[e] <=>				Exchange Reactions	1	0	1000	0
oxoglutarate_tx	Transport Reaction	C00940[c] <=> C00940[e]				Transport Reactions	1	-1000	1000	0
EX_oxoglutarate	Exchange Reaction	C00940[e] <=>				Exchange Reactions	1	0	1000	0
EX_alanine	Exchange Reaction	1.0 C00041[e] <=>				Exchange Reactions	1	0	1000	0
EX_Aspargine	Exchange Reaction	1.0 C00152[e] <=>				Exchange Reactions	1	0	1000	0
EX_Aspartate	Exchange Reaction	1.0 C00049[e] <=>				Exchange Reactions	1	0	1000	0
EX_Cysteine	Exchange Reaction	1.0 C00097[e] <=>				Exchange Reactions	1	0	1000	0
EX_Glutamate	Exchange Reaction	1.0 C00025[e] <=>				Exchange Reactions	1	0	1000	0
EX_Glutamine	Exchange Reaction	1.0 C00064[e] <=>				Exchange Reactions	1	0	1000	0
EX_Valine	Exchange Reaction	1.0 C00183[e] <=>				Exchange Reactions	1	0	1000	0
EX_methanol	Exchange Reaction	1.0 C00132[e] <=>				Exchange Reactions	1	0	1000	0
methanol_tx	Transport Reaction	1.0 C00132[e] <=> 1.0 C00132[c]				Exchange Reactions	1	0	1000	0
EX_formaldehyde	Transport Reaction	1.0 C00067[e] <=>				Exchange Reactions	1	0	1000	0
formaldehyde_tx	Transport Reaction	1.0 C00067[e] <=> 1.0 C00067[c]				Exchange Reactions	1	-1000	1000	0
ubiquinol_tx_pc	Transport Reaction	C00390[p] <=> C00390[c]				Exchange Reactions	1	-1000	1000	0
ubiquinone_tx_pc	Transport Reaction	C00399[p] <=> C00399[c]				Exchange Reactions	1	-1000	1000	0
ferricytochrome_tx_pc	Transport Reaction	1.0 C18233[p] <=> 1.0 C18233[c]				Exchange Reactions	1	-1000	1000	0
ferrochrome_tx_pc	Transport Reaction	1.0 C18234[p] <=> 1.0 C18234[c]				Exchange Reactions	1	-1000	1000	0
formaldehyde_tx_pc	Transport Reaction	1.0 C00067[p] <=> 1.0 C00067[c]				Exchange Reactions	1	-1000	1000	0
methanol_tx_cp	Transport Reaction	1.0 C00132[c] <=> 1.0 C00132[p]				Exchange Reactions	1	-1000	1000	0
R02164_ub	succinate:quinone oxidoreductase	C00399[c] + C00042[c] -> C00390[c] + C00122[c]	MCA1542 and MCA1548 and MCA1549 and MCA1550	MCA1542,MCA1548,MCA1549,MCA1550	1.3.5.1	Citrate cycle (TCA cycle)	0	0	1000	0		1.3.5.1
