# Supplementary material for: Genome-scale metabolic reconstruction and metabolic versatility of an obligate methanotroph Methylococcus capsulatus str. Bath
Source: PeerJ. 2019 Jun 14;7:e6685. doi: 10.7717/peerj.6685 (PMC6613435; doi:10.7717/peerj.6685)
Supplement: Supplemental Information 5 [file peerj-07-6685-s005.xlsx]

## Sheet: Essential Genes
Gene ID	Gene Name	Subsystem	System
MCA0014	bifunctional N-acetylglucosamine-1-phosphate	Amino sugar and nucleotide sugar metabolism	Carbohydrate metabolism
MCA0015	glutamine--fructose-6-phosphate	Alanine, aspartate and glutamate metabolism	Amino acid metabolism
MCA0021	phosphoribosylaminoimidazolesuccinocarboxamide	Purine metabolism	Nucleotide metabolism
MCA0047	sugar kinase	Purine metabolism	Nucleotide metabolism
MCA0066	phosphopantetheine adenylyltransferase	Pantothenate and CoA biosynthesis	Metabolism of vitamins
MCA0137	methylenetetrahydrofolate reductase [NAD(P)H]	One carbon pool by folate	Metabolism of cofactors
MCA0138	adenosylhomocysteinase	Cysteine and methionine metabolism	Amino acid metabolism
MCA0290	GMP synthase (glutamine-hydrolyzing)	Purine metabolism	Nucleotide metabolism
MCA0291	IMP dehydrogenase	Purine metabolism	Nucleotide metabolism
MCA0330	shikimate kinase	Phenylalanine, tyrosine and tryptophan biosynthesis	Amino acid metabolism
MCA0331	3-dehydroquinate synthase	Phenylalanine, tyrosine and tryptophan biosynthesis	Amino acid metabolism
MCA0354	PLP-dependent threonine dehydratase	Glycine, serine and threonine metabolism,Histidine metabolism	Amino acid metabolism
MCA0361	paraquat-inducible protein A	Purine metabolism	Nucleotide metabolism
MCA0373	phosphoribosylformylglycinamidine cyclo-ligase	Purine metabolism	Nucleotide metabolism
MCA0376	quinolinate synthetase	Nicotinate and nicotinamide metabolism	Metabolism of vitamins
MCA0390	aspartate kinase	Glycine, serine and threonine metabolism	Amino acid metabolism
MCA0400	lipid-A-disaccharide synthase	Lipopolysaccharide biosynthesis	Glycan biosynthesis and metabolism
MCA0431	sulfite reductase [NADPH] flavoprotein,	Sulfur metabolism	Energy metabolism
MCA0561	glucokinase	Glycolysis / Gluconeogenesis,Starch and sucrose metabolism	Carbohydrate metabolism
MCA0571	di-trans,poly-cis-decaprenylcistransferase	Terpenoid backbone biosynthesis	Metabolism of terpenoids and polyketides
MCA0573	1-deoxy-D-xylulose-5-phosphate reductoisomerase	Terpenoid backbone biosynthesis	Metabolism of terpenoids and polyketides
MCA0591	nitrite reductase (NAD(P)H) small subunit	Nitrogen metabolism	Energy metabolism
MCA0592	nitrite reductase large subunit	Nitrogen metabolism	Energy metabolism
MCA0596	threonine synthase	Glycine, serine and threonine metabolism,Vitamin B6 metabolism	Amino acid metabolism,Metabolism of vitamins
MCA0597	homoserine dehydrogenase	Glycine, serine and threonine metabolism	Amino acid metabolism
MCA0633	tetraacyldisaccharide 4'-kinase	Lipopolysaccharide biosynthesis	Glycan biosynthesis and metabolism
MCA0635	3-deoxy-manno-octulosonate cytidylyltransferase	Lipopolysaccharide biosynthesis	Glycan biosynthesis and metabolism
MCA0671	4-hydroxy-tetrahydrodipicolinate synthase	Monobactam biosynthesis	Biosynthesis of other secondary metabolites
MCA0673	phosphoribosylformylglycinamidine synthase	Purine metabolism	Nucleotide metabolism
MCA0702	chorismate synthase	Phenylalanine, tyrosine and tryptophan biosynthesis	Amino acid metabolism
MCA0745	3-deoxy-D-manno-octulosonate 8-phosphate	Lipopolysaccharide biosynthesis	Glycan biosynthesis and metabolism
MCA0746	D-arabinose 5-phosphate isomerase	Lipopolysaccharide biosynthesis	Glycan biosynthesis and metabolism
MCA0768	diguanylate cyclase	Pyrimidine metabolism	Nucleotide metabolism
MCA0769	pyruvate:ferredoxin (flavodoxin) oxidoreductase	Glycolysis / Gluconeogenesis	Carbohydrate metabolism
MCA0775	alcohol dehydrogenase	Chloroalkane and chloroalkene degradation,Glycolysis / Gluconeogenesis,Naphthalene degradation,Tyrosine metabolism	Xenobiotics biodegradation and metabolism,Carbohydrate metabolism,Amino acid metabolism
MCA0779	methanol oxidation system protein MoxJ	Chloroalkane and chloroalkene degradation,Glycolysis / Gluconeogenesis,Methane metabolism	Xenobiotics biodegradation and metabolism,Carbohydrate metabolism,Energy metabolism
MCA0780	MxaJ protein	Methane metabolism	Energy metabolism
MCA0781	cytochrome c(L), periplasmic	Methane metabolism	Energy metabolism
MCA0782	methanol dehydrogenase	Chloroalkane and chloroalkene degradation,Glycolysis / Gluconeogenesis,Methane metabolism	Xenobiotics biodegradation and metabolism,Carbohydrate metabolism,Energy metabolism
MCA0785	hypothetical protein	Methane metabolism	Energy metabolism
MCA0789	IS5/IS1182 family transposase	Methane metabolism	Energy metabolism
MCA0813	phytoene synthase	Steroid biosynthesis	Lipid metabolism
MCA0817	1-deoxy-D-xylulose-5-phosphate synthase	Thiamine metabolism	Metabolism of vitamins
MCA0818	(2E,6E)-farnesyl diphosphate synthase	Terpenoid backbone biosynthesis	Metabolism of terpenoids and polyketides
MCA0847	citrate (Si)-synthase	Citrate cycle (TCA cycle)	Carbohydrate metabolism
MCA0858	diaminopimelate decarboxylase	Lysine biosynthesis	Amino acid metabolism
MCA0859	diaminopimelate epimerase	Lysine biosynthesis	Amino acid metabolism
MCA0942	alpha-amylase	Galactose metabolism,Metabolic pathways,Starch and sucrose metabolism	Carbohydrate metabolism,Others
MCA1044	3-dehydroquinate dehydratase	Phenylalanine, tyrosine and tryptophan biosynthesis	Amino acid metabolism
MCA1045	acetyl-CoA carboxylase biotin carboxyl carrier	Fatty acid biosynthesis	Lipid metabolism
MCA1046	acetyl-CoA carboxylase biotin carboxylase	Fatty acid biosynthesis	Lipid metabolism
MCA1055	4-diphosphocytidyl-2C-methyl-D-erythritol	Terpenoid backbone biosynthesis	Metabolism of terpenoids and polyketides
MCA1076	phospho-2-dehydro-3-deoxyheptonate aldolase	Phenylalanine, tyrosine and tryptophan biosynthesis	Amino acid metabolism
MCA1094	hypothetical protein	Pyrimidine metabolism	Nucleotide metabolism
MCA1099	argininosuccinate synthase	Arginine biosynthesis	Amino acid metabolism
MCA1247	glucose-6-phosphate isomerase	Glycolysis / Gluconeogenesis,Starch and sucrose metabolism	Carbohydrate metabolism
MCA1248	argininosuccinate lyase	Arginine biosynthesis	Amino acid metabolism
MCA1263	enoyl-ACP reductase	Biotin metabolism,Fatty acid biosynthesis	Metabolism of vitamins,Lipid metabolism
MCA1294	UDP-N-acetylmuramoyl-tripeptide--D-alanyl-D-	Lysine biosynthesis,Peptidoglycan biosynthesis	Amino acid metabolism,Glycan biosynthesis and metabolism
MCA1318	UDP-2,3-diacylglucosamine diphosphatase	Lipopolysaccharide biosynthesis	Glycan biosynthesis and metabolism
MCA1404	delta(24)-sterol reductase	Steroid biosynthesis	Lipid metabolism
MCA1408	hypothetical protein	Glycine, serine and threonine metabolism	Amino acid metabolism
MCA1414	cytidylate kinase	Pyrimidine metabolism	Nucleotide metabolism
MCA1415	3-phosphoshikimate 1-carboxyvinyltransferase	Phenylalanine, tyrosine and tryptophan biosynthesis	Amino acid metabolism
MCA1416	prephenate dehydrogenase	Phenylalanine, tyrosine and tryptophan biosynthesis	Amino acid metabolism
MCA1418	chorismate mutase	Phenylalanine, tyrosine and tryptophan biosynthesis	Amino acid metabolism
MCA1474	glucose-1-phosphate adenylyltransferase	Starch and sucrose metabolism	Carbohydrate metabolism
MCA1490	2,3,4,5-tetrahydropyridine-2,6-dicarboxylate	Lysine biosynthesis	Amino acid metabolism
MCA1491	succinyldiaminopimelate transaminase	Lysine biosynthesis	Amino acid metabolism
MCA1535	pyrroline-5-carboxylate reductase	Arginine and proline metabolism	Amino acid metabolism
MCA1543	class II fumarate hydratase	Citrate cycle (TCA cycle)	Carbohydrate metabolism
MCA1545	methionine synthase	Cysteine and methionine metabolism,Selenocompound metabolism	Amino acid metabolism,Metabolism of other amino acids
MCA1553	succinyl-diaminopimelate desuccinylase	Lysine biosynthesis	Amino acid metabolism
MCA1637	ribonucleotide-diphosphate reductase subunit	Purine metabolism,Pyrimidine metabolism	Nucleotide metabolism
MCA1655	6,7-dimethyl-8-ribityllumazine synthase	Riboflavin metabolism	Metabolism of vitamins
MCA1656	bifunctional	Riboflavin metabolism	Metabolism of vitamins
MCA1658	riboflavin biosynthesis protein RibD	Riboflavin metabolism	Metabolism of vitamins
MCA1694	thioredoxin-disulfide reductase	Pyrimidine metabolism,Selenocompound metabolism	Nucleotide metabolism,Metabolism of other amino acids
MCA1741	succinate--CoA ligase subunit alpha	Glyoxylate and dicarboxylate metabolism,Purine metabolism	Carbohydrate metabolism,Nucleotide metabolism
MCA1747	bifunctional	Purine metabolism	Nucleotide metabolism
MCA1780	type III pantothenate kinase	Pantothenate and CoA biosynthesis	Metabolism of vitamins
MCA1784	adenylosuccinate lyase	Purine metabolism	Nucleotide metabolism
MCA1804	acetyl-CoA carboxylase carboxyl transferase	Fatty acid biosynthesis	Lipid metabolism
MCA1815	4-hydroxy-3-methylbut-2-enyl diphosphate	Terpenoid backbone biosynthesis	Metabolism of terpenoids and polyketides
MCA1847	phosphoglucosamine mutase	Amino sugar and nucleotide sugar metabolism	Carbohydrate metabolism
MCA1854	4-hydroxy-tetrahydrodipicolinate reductase	Monobactam biosynthesis	Biosynthesis of other secondary metabolites
MCA1859	NAD(+) kinase	Nicotinate and nicotinamide metabolism	Metabolism of vitamins
MCA1876	ATPase	Cysteine and methionine metabolism	Amino acid metabolism
MCA1879	nicotinate-nicotinamide nucleotide	Nicotinate and nicotinamide metabolism	Metabolism of vitamins
MCA1963	histidinol dehydrogenase	Histidine metabolism	Amino acid metabolism
MCA1964	ATP phosphoribosyltransferase	Histidine metabolism	Amino acid metabolism
MCA1965	UDP-N-acetylglucosamine	Amino sugar and nucleotide sugar metabolism	Carbohydrate metabolism
MCA1978	adenylosuccinate synthetase	Purine metabolism	Nucleotide metabolism
MCA1979	ATP phosphoribosyltransferase regulatory	Histidine metabolism	Amino acid metabolism
MCA1996	thymidylate kinase	Pyrimidine metabolism	Nucleotide metabolism
MCA2002	malonyl CoA-acyl carrier protein transacylase	Fatty acid biosynthesis	Lipid metabolism
MCA2003	3-oxoacyl-ACP synthase III	Fatty acid biosynthesis	Lipid metabolism
MCA2009	phosphoribosylglycinamide formyltransferase 2	One carbon pool by folate,Purine metabolism	Metabolism of cofactors,Nucleotide metabolism
MCA2034	3-deoxy-D-manno-octulosonic acid transferase	Lipopolysaccharide biosynthesis	Glycan biosynthesis and metabolism
MCA2059	sulfite reductase	Sulfur metabolism	Energy metabolism
MCA2062	aspartate-semialdehyde dehydrogenase	Glycine, serine and threonine metabolism	Amino acid metabolism
MCA2063	3-isopropylmalate dehydrogenase	Valine, leucine and isoleucine biosynthesis	Amino acid metabolism
MCA2064	3-isopropylmalate dehydratase small subunit	Valine, leucine and isoleucine biosynthesis	Amino acid metabolism
MCA2065	3-isopropylmalate dehydratase large subunit	Valine, leucine and isoleucine biosynthesis	Amino acid metabolism
MCA2066	adenylate kinase	Purine metabolism	Nucleotide metabolism
MCA2082	dihydroxy-acid dehydratase	Pantothenate and CoA biosynthesis,Valine, leucine and isoleucine biosynthesis	Metabolism of vitamins,Amino acid metabolism
MCA2093	dephospho-CoA kinase	Pantothenate and CoA biosynthesis	Metabolism of vitamins
MCA2202	aspartate aminotransferase	Arginine and proline metabolism,Arginine biosynthesis,Cysteine and methionine metabolism,Ubiquinone and other terpenoid-quinone biosynthesis	Amino acid metabolism,Metabolism of cofactors
MCA2252	bifunctional riboflavin kinase/FMN	Riboflavin metabolism	Metabolism of vitamins
MCA2271	acetolactate synthase small subunit	Pantothenate and CoA biosynthesis,Valine, leucine and isoleucine biosynthesis	Metabolism of vitamins,Amino acid metabolism
MCA2272	ketol-acid reductoisomerase	Pantothenate and CoA biosynthesis,Valine, leucine and isoleucine biosynthesis	Metabolism of vitamins,Amino acid metabolism
MCA2275	2-isopropylmalate synthase	Valine, leucine and isoleucine biosynthesis	Amino acid metabolism
MCA2314	3-methyl-2-oxobutanoate	Pantothenate and CoA biosynthesis	Metabolism of vitamins
MCA2315	pantoate--beta-alanine ligase	beta-Alanine metabolism	Metabolism of other amino acids
MCA2316	aspartate 1-decarboxylase	beta-Alanine metabolism	Metabolism of other amino acids
MCA2333	aspartate carbamoyltransferase	Pyrimidine metabolism	Nucleotide metabolism
MCA2344	branched chain amino acid aminotransferase	Cysteine and methionine metabolism,Valine, leucine and isoleucine degradation	Amino acid metabolism
MCA2422	UDP-3-O-[3-hydroxymyristoyl] N-acetylglucosamine	Lipopolysaccharide biosynthesis	Glycan biosynthesis and metabolism
MCA2426	D-alanine--D-alanine ligase	D-Alanine metabolism	Metabolism of other amino acids
MCA2427	UDP-N-acetylenolpyruvoylglucosamine reductase	Amino sugar and nucleotide sugar metabolism	Carbohydrate metabolism
MCA2428	UDP-N-acetylmuramate--L-alanine ligase	D-Glutamine and D-glutamate metabolism	Metabolism of other amino acids
MCA2429	undecaprenyldiphospho-muramoylpentapeptide	Peptidoglycan biosynthesis	Glycan biosynthesis and metabolism
MCA2431	UDP-N-acetylmuramoyl-L-alanine--D-glutamate	D-Glutamine and D-glutamate metabolism	Metabolism of other amino acids
MCA2432	phospho-N-acetylmuramoyl-pentapeptide-	Peptidoglycan biosynthesis	Glycan biosynthesis and metabolism
MCA2433	UDP-N-acetylmuramoyl-L-alanyl-D-glutamate--2,	Lysine biosynthesis	Amino acid metabolism
MCA2483	4-hydroxy-3-methylbut-2-en-1-yl diphosphate	Terpenoid backbone biosynthesis	Metabolism of terpenoids and polyketides
MCA2485	aconitate hydratase B	Citrate cycle (TCA cycle),Propanoate metabolism	Carbohydrate metabolism
MCA2488	O-succinylhomoserine sulfhydrylase	Cysteine and methionine metabolism	Amino acid metabolism
MCA2489	amidophosphoribosyltransferase	Purine metabolism	Nucleotide metabolism
MCA2493	acetyl-CoA carboxylase carboxyl transferase	Fatty acid biosynthesis	Lipid metabolism
MCA2494	tryptophan synthase subunit alpha	Glycine, serine and threonine metabolism,Phenylalanine, tyrosine and tryptophan biosynthesis	Amino acid metabolism
MCA2496	N-(5'-phosphoribosyl)anthranilate isomerase	Phenylalanine, tyrosine and tryptophan biosynthesis	Amino acid metabolism
MCA2513	CTP synthetase	Pyrimidine metabolism	Nucleotide metabolism
MCA2514	2-dehydro-3-deoxyphosphooctonate aldolase	Lipopolysaccharide biosynthesis	Glycan biosynthesis and metabolism
MCA2517	2-C-methyl-D-erythritol 4-phosphate	Terpenoid backbone biosynthesis	Metabolism of terpenoids and polyketides
MCA2518	2-C-methyl-D-erythritol 2,4-cyclodiphosphate	Terpenoid backbone biosynthesis	Metabolism of terpenoids and polyketides
MCA2523	hypothetical protein	Pantothenate and CoA biosynthesis	Metabolism of vitamins
MCA2529	5-(carboxyamino)imidazole ribonucleotide	Purine metabolism	Nucleotide metabolism
MCA2530	5-(carboxyamino)imidazole ribonucleotide mutase	Purine metabolism	Nucleotide metabolism
MCA2538	NAD(P)H-dependent glycerol-3-phosphate	Glycerophospholipid metabolism	Lipid metabolism
MCA2582	ribulose-phosphate 3-epimerase	Pentose phosphate pathway	Carbohydrate metabolism
MCA2584	anthranilate synthase component I	Phenylalanine, tyrosine and tryptophan biosynthesis	Amino acid metabolism
MCA2585	glutamine amidotransferase	Phenylalanine, tyrosine and tryptophan biosynthesis	Amino acid metabolism
MCA2586	anthranilate phosphoribosyltransferase	Phenylalanine, tyrosine and tryptophan biosynthesis	Amino acid metabolism
MCA2587	indole-3-glycerol-phosphate synthase	Phenylalanine, tyrosine and tryptophan biosynthesis	Amino acid metabolism
MCA2588	UDP-3-O-(3-hydroxymyristoyl)glucosamine	Lipopolysaccharide biosynthesis	Glycan biosynthesis and metabolism
MCA2711	cytochrome P450	Steroid biosynthesis	Lipid metabolism
MCA2728	thymidylate synthase	Pyrimidine metabolism	Nucleotide metabolism
MCA2729	diacylglycerol kinase	One carbon pool by folate	Metabolism of cofactors
MCA2740	orotate phosphoribosyltransferase	Pyrimidine metabolism	Nucleotide metabolism
MCA2783	deoxyuridine 5'-triphosphate	Pyrimidine metabolism	Nucleotide metabolism
MCA2784	hypothetical protein	Pantothenate and CoA biosynthesis	Metabolism of vitamins
MCA2794	shikimate dehydrogenase (NADP+)	Phenylalanine, tyrosine and tryptophan biosynthesis	Amino acid metabolism
MCA2800	phosphoribosyl-ATP pyrophosphatase	Histidine metabolism	Amino acid metabolism
MCA2801	phosphoribosyl-AMP cyclohydrolase	Histidine metabolism	Amino acid metabolism
MCA2802	imidazole glycerol phosphate synthase cyclase	Histidine metabolism	Amino acid metabolism
MCA2804	imidazole glycerol phosphate synthase subunit	Histidine metabolism	Amino acid metabolism
MCA2886	nucleoside-diphosphate kinase	Purine metabolism,Pyrimidine metabolism	Nucleotide metabolism
MCA3045	transaldolase	Pentose phosphate pathway	Carbohydrate metabolism
MCA3071	isocitrate dehydrogenase	Citrate cycle (TCA cycle)	Carbohydrate metabolism
MCA3101	nicotinate-nucleotide diphosphorylase	Nicotinate and nicotinamide metabolism	Metabolism of vitamins
