# Supplementary material for: Genome-scale metabolic reconstruction and metabolic versatility of an obligate methanotroph Methylococcus capsulatus str. Bath
Source: PeerJ. 2019 Jun 14;7:e6685. doi: 10.7717/peerj.6685 (PMC6613435; doi:10.7717/peerj.6685)
Supplement: Supplemental Information 6 [file peerj-07-6685-s006.xlsx]

## Sheet: Lethal Gene Pairs
Gene 1 ID	Gene 1 Name	Gene 1 Subsystem	Gene 1 System	Gene 2 ID	Gene 2 Name	Gene 2 Subsystem	Gene 2 System
MCA0024	6-phosphogluconolactonase	Pentose phosphate pathway	Carbohydrate metabolism	MCA2970	6-phosphogluconolactonase	Pentose phosphate pathway	Carbohydrate metabolism
MCA0025	glucose-6-phosphate dehydrogenase	Pentose phosphate pathway	Carbohydrate metabolism	MCA2971	glucose-6-phosphate dehydrogenase	Pentose phosphate pathway	Carbohydrate metabolism
MCA0037	phosphogluconate dehydratase	Pentose phosphate pathway	Carbohydrate metabolism	MCA0038	ketohydroxyglutarate aldolase	Glyoxylate and dicarboxylate metabolism	Carbohydrate metabolism
MCA0043	ribose 5-phosphate isomerase B	Fructose and mannose metabolism	Carbohydrate metabolism	MCA0355	ribose-5-phosphate isomerase	Fructose and mannose metabolism	Carbohydrate metabolism
MCA0046	nucleoside triphosphate pyrophosphohydrolase	Purine metabolism	Nucleotide metabolism	MCA2975	guanylate kinase	Purine metabolism	Nucleotide metabolism
MCA0106	cytochrome c550	Arginine and proline metabolism	Amino acid metabolism	MCA1276	glutamate racemase	D-Glutamine and D-glutamate metabolism	Metabolism of other amino acids
MCA0106	cytochrome c550	Arginine and proline metabolism	Amino acid metabolism	MCA1734	alanine racemase	D-Alanine metabolism	Metabolism of other amino acids
MCA0139	S-adenosylmethionine synthase	Cysteine and methionine metabolism	Amino acid metabolism	MCA0450	methionine adenosyltransferase	Cysteine and methionine metabolism	Amino acid metabolism
MCA0348	glycine dehydrogenase	Glycine, serine and threonine metabolism	Amino acid metabolism	MCA1660	serine hydroxymethyltransferase	Glycine, serine and threonine metabolism	Amino acid metabolism
MCA0349	glycine dehydrogenase	Glycine, serine and threonine metabolism	Amino acid metabolism	MCA1660	serine hydroxymethyltransferase	Glycine, serine and threonine metabolism	Amino acid metabolism
MCA0350	aminomethyltransferase	Glycine, serine and threonine metabolism	Amino acid metabolism	MCA1660	serine hydroxymethyltransferase	Glycine, serine and threonine metabolism	Amino acid metabolism
MCA0351	carboxymuconolactone decarboxylase	Glyoxylate and dicarboxylate metabolism	Carbohydrate metabolism	MCA1660	serine hydroxymethyltransferase	Glycine, serine and threonine metabolism	Amino acid metabolism
MCA0385	competence damage-inducible protein A	Nicotinate and nicotinamide metabolism	Metabolism of vitamins	MCA0969	NAD+ synthase	Nicotinate and nicotinamide metabolism	Metabolism of vitamins
MCA0397	acyl-[acyl-carrier-protein]--UDP-N-	Lipopolysaccharide biosynthesis	Glycan biosynthesis and metabolism	MCA2444	acyl-[acyl-carrier-protein]--UDP-N-	Lipopolysaccharide biosynthesis	Glycan biosynthesis and metabolism
MCA0607	alpha-D-glucose phosphate-specific	Glycolysis / Gluconeogenesis	Carbohydrate metabolism	MCA2782	phosphoglucomutase	Fructose and mannose metabolism	Carbohydrate metabolism
MCA0666	undecaprenyl-diphosphatase	Peptidoglycan biosynthesis	Glycan biosynthesis and metabolism	MCA2985	phosphatase PAP2 family protein	Peptidoglycan biosynthesis	Glycan biosynthesis and metabolism
MCA0674	triose-phosphate isomerase	Glycolysis / Gluconeogenesis	Carbohydrate metabolism	MCA0753	phosphoglycerate mutase	Glycolysis / Gluconeogenesis	Carbohydrate metabolism
MCA0674	triose-phosphate isomerase	Glycolysis / Gluconeogenesis	Carbohydrate metabolism	MCA1251	6-phosphofructokinase	Galactose metabolism	Carbohydrate metabolism
MCA0674	triose-phosphate isomerase	Glycolysis / Gluconeogenesis	Carbohydrate metabolism	MCA2021	phosphoglycerate kinase	Glycolysis / Gluconeogenesis	Carbohydrate metabolism
MCA0674	triose-phosphate isomerase	Glycolysis / Gluconeogenesis	Carbohydrate metabolism	MCA2598	hypothetical protein	Glycolysis / Gluconeogenesis	Carbohydrate metabolism
MCA0700	N-acetyl-gamma-glutamyl-phosphate reductase	Arginine biosynthesis	Amino acid metabolism	MCA0809	aspartate aminotransferase family protein	Arginine and proline metabolism	Amino acid metabolism
MCA0700	N-acetyl-gamma-glutamyl-phosphate reductase	Arginine biosynthesis	Amino acid metabolism	MCA1880	gamma-glutamyl-phosphate reductase	Arginine and proline metabolism	Amino acid metabolism
MCA0700	N-acetyl-gamma-glutamyl-phosphate reductase	Arginine biosynthesis	Amino acid metabolism	MCA2249	glutamate 5-kinase	Arginine and proline metabolism	Amino acid metabolism
MCA0753	phosphoglycerate mutase	Glycolysis / Gluconeogenesis	Carbohydrate metabolism	MCA1251	6-phosphofructokinase	Galactose metabolism	Carbohydrate metabolism
MCA0753	phosphoglycerate mutase	Glycolysis / Gluconeogenesis	Carbohydrate metabolism	MCA2021	phosphoglycerate kinase	Glycolysis / Gluconeogenesis	Carbohydrate metabolism
MCA0753	phosphoglycerate mutase	Glycolysis / Gluconeogenesis	Carbohydrate metabolism	MCA2598	hypothetical protein	Glycolysis / Gluconeogenesis	Carbohydrate metabolism
MCA0786	VWA domain-containing protein	Methane metabolism	Energy metabolism	MCA1528	MxaC protein	Methane metabolism	Energy metabolism
MCA0787	hypothetical protein	Methane metabolism	Energy metabolism	MCA1529	MxaK protein	Methane metabolism	Energy metabolism
MCA0788	MxaL protein	Methane metabolism	Energy metabolism	MCA1530	MxaL protein	Methane metabolism	Energy metabolism
MCA0809	aspartate aminotransferase family protein	Arginine and proline metabolism	Amino acid metabolism	MCA1679	bifunctional glutamate	Arginine biosynthesis	Amino acid metabolism
MCA0809	aspartate aminotransferase family protein	Arginine and proline metabolism	Amino acid metabolism	MCA1880	gamma-glutamyl-phosphate reductase	Arginine and proline metabolism	Amino acid metabolism
MCA0809	aspartate aminotransferase family protein	Arginine and proline metabolism	Amino acid metabolism	MCA2079	aspartate aminotransferase family protein	Arginine biosynthesis	Amino acid metabolism
MCA0809	aspartate aminotransferase family protein	Arginine and proline metabolism	Amino acid metabolism	MCA2249	glutamate 5-kinase	Arginine and proline metabolism	Amino acid metabolism
MCA0809	aspartate aminotransferase family protein	Arginine and proline metabolism	Amino acid metabolism	MCA2781	acetylglutamate kinase	Arginine biosynthesis	Amino acid metabolism
MCA0927	3-ketoacyl-ACP reductase	Biotin metabolism	Metabolism of vitamins	MCA2001	beta-ketoacyl-ACP reductase	Biotin metabolism	Metabolism of vitamins
MCA0956	hydroxylamine reductase	Nitrogen metabolism	Energy metabolism	MCA1962	ubiquinol-cytochrome c reductase iron-sulfur	Oxidative Phosphorylation	Energy metabolism
MCA0967	succinate--CoA ligase subunit beta	C5-Branched dibasic acid metabolism	Carbohydrate metabolism	MCA1952	2-oxoglutarate dehydrogenase subunit E1	Citrate cycle (TCA cycle)	Carbohydrate metabolism
MCA0967	succinate--CoA ligase subunit beta	C5-Branched dibasic acid metabolism	Carbohydrate metabolism	MCA1953	dihydrolipoamide succinyltransferase	Citrate cycle (TCA cycle)	Carbohydrate metabolism
MCA0967	succinate--CoA ligase subunit beta	C5-Branched dibasic acid metabolism	Carbohydrate metabolism	MCA3002	dihydrolipoyl dehydrogenase	Glyoxylate and dicarboxylate metabolism	Carbohydrate metabolism
MCA0968	succinyl-CoA synthetase subunit alpha	C5-Branched dibasic acid metabolism	Carbohydrate metabolism	MCA1952	2-oxoglutarate dehydrogenase subunit E1	Citrate cycle (TCA cycle)	Carbohydrate metabolism
MCA0968	succinyl-CoA synthetase subunit alpha	C5-Branched dibasic acid metabolism	Carbohydrate metabolism	MCA1953	dihydrolipoamide succinyltransferase	Citrate cycle (TCA cycle)	Carbohydrate metabolism
MCA0968	succinyl-CoA synthetase subunit alpha	C5-Branched dibasic acid metabolism	Carbohydrate metabolism	MCA3002	dihydrolipoyl dehydrogenase	Glyoxylate and dicarboxylate metabolism	Carbohydrate metabolism
MCA1056	ribose-phosphate pyrophosphokinase	Pentose phosphate pathway	Carbohydrate metabolism	MCA1716	phosphoribosylpyrophosphate synthetase	Pentose phosphate pathway	Carbohydrate metabolism
MCA1113	hypothetical protein	Histidine metabolism	Amino acid metabolism	MCA1417	histidinol-phosphate aminotransferase	Histidine metabolism	Amino acid metabolism
MCA1242	dihydroorotate dehydrogenase (quinone)	Pyrimidine metabolism	Nucleotide metabolism	MCA1589	acetate kinase	Propanoate metabolism	Carbohydrate metabolism
MCA1251	6-phosphofructokinase	Galactose metabolism	Carbohydrate metabolism	MCA2021	phosphoglycerate kinase	Glycolysis / Gluconeogenesis	Carbohydrate metabolism
MCA1251	6-phosphofructokinase	Galactose metabolism	Carbohydrate metabolism	MCA2598	hypothetical protein	Glycolysis / Gluconeogenesis	Carbohydrate metabolism
MCA1276	glutamate racemase	D-Glutamine and D-glutamate metabolism	Metabolism of other amino acids	MCA1734	alanine racemase	D-Alanine metabolism	Metabolism of other amino acids
MCA1406	serine--glyoxylate aminotransferase	Alanine, aspartate and glutamate metabolism	Amino acid metabolism	MCA1660	serine hydroxymethyltransferase	Glycine, serine and threonine metabolism	Amino acid metabolism
MCA1476	glycogen synthase	Starch and sucrose metabolism	Carbohydrate metabolism	MCA2606	glycogen synthase	Starch and sucrose metabolism	Carbohydrate metabolism
MCA1542	succinate dehydrogenase iron-sulfur subunit	Citrate cycle (TCA cycle)	Carbohydrate metabolism	MCA1589	acetate kinase	Propanoate metabolism	Carbohydrate metabolism
MCA1548	succinate dehydrogenase, cytochrome b556	Citrate cycle (TCA cycle)	Carbohydrate metabolism	MCA1589	acetate kinase	Propanoate metabolism	Carbohydrate metabolism
MCA1549	succinate dehydrogenase, hydrophobic membrane	Citrate cycle (TCA cycle)	Carbohydrate metabolism	MCA1589	acetate kinase	Propanoate metabolism	Carbohydrate metabolism
MCA1550	succinate dehydrogenase flavoprotein subunit	Citrate cycle (TCA cycle)	Carbohydrate metabolism	MCA1589	acetate kinase	Propanoate metabolism	Carbohydrate metabolism
MCA1587	phosphoketolase	Pentose phosphate pathway	Carbohydrate metabolism	MCA3002	dihydrolipoyl dehydrogenase	Glyoxylate and dicarboxylate metabolism	Carbohydrate metabolism
MCA1634	ribonucleoside-diphosphate reductase subunit	Purine metabolism	Nucleotide metabolism	MCA2543	ribonucleotide reductase	Purine metabolism	Nucleotide metabolism
MCA1657	riboflavin synthase	Riboflavin metabolism	Metabolism of vitamins	MCA1865	hypothetical protein	Riboflavin metabolism	Metabolism of vitamins
MCA1660	serine hydroxymethyltransferase	Glycine, serine and threonine metabolism	Amino acid metabolism	MCA1739	CoA ester lyase	Glyoxylate and dicarboxylate metabolism	Carbohydrate metabolism
MCA1660	serine hydroxymethyltransferase	Glycine, serine and threonine metabolism	Amino acid metabolism	MCA1740	succinate--CoA ligase subunit beta	Glyoxylate and dicarboxylate metabolism	Carbohydrate metabolism
MCA1660	serine hydroxymethyltransferase	Glycine, serine and threonine metabolism	Amino acid metabolism	MCA3002	dihydrolipoyl dehydrogenase	Glyoxylate and dicarboxylate metabolism	Carbohydrate metabolism
MCA1677	glutamine synthetase	Arginine biosynthesis	Amino acid metabolism	MCA2039	glutamate synthase subunit alpha	Alanine, aspartate and glutamate metabolism	Amino acid metabolism
MCA1677	glutamine synthetase	Arginine biosynthesis	Amino acid metabolism	MCA2040	dihydropyrimidine dehydrogenase subunit A	Alanine, aspartate and glutamate metabolism	Amino acid metabolism
MCA1679	bifunctional glutamate	Arginine biosynthesis	Amino acid metabolism	MCA1880	gamma-glutamyl-phosphate reductase	Arginine and proline metabolism	Amino acid metabolism
MCA1679	bifunctional glutamate	Arginine biosynthesis	Amino acid metabolism	MCA2249	glutamate 5-kinase	Arginine and proline metabolism	Amino acid metabolism
MCA1837	acetolactate synthase AlsS	Pantothenate and CoA biosynthesis	Metabolism of vitamins	MCA2270	acetolactate synthase, large subunit,	Pantothenate and CoA biosynthesis	Metabolism of vitamins
MCA1880	gamma-glutamyl-phosphate reductase	Arginine and proline metabolism	Amino acid metabolism	MCA2079	aspartate aminotransferase family protein	Arginine biosynthesis	Amino acid metabolism
MCA1880	gamma-glutamyl-phosphate reductase	Arginine and proline metabolism	Amino acid metabolism	MCA2781	acetylglutamate kinase	Arginine biosynthesis	Amino acid metabolism
MCA2043	acetyl-coenzyme A synthetase	Glycolysis / Gluconeogenesis	Carbohydrate metabolism	MCA3002	dihydrolipoyl dehydrogenase	Glyoxylate and dicarboxylate metabolism	Carbohydrate metabolism
MCA2075	dihydroorotase	Pyrimidine metabolism	Nucleotide metabolism	MCA2332	dihydroorotase	Pyrimidine metabolism	Nucleotide metabolism
MCA2079	aspartate aminotransferase family protein	Arginine biosynthesis	Amino acid metabolism	MCA2249	glutamate 5-kinase	Arginine and proline metabolism	Amino acid metabolism
MCA2148	gamma-glutamyltransferase	Cyanoamino acid metabolism	Metabolism of other amino acids	MCA2338	glutathione synthase	Cysteine and methionine metabolism	Amino acid metabolism
MCA2148	gamma-glutamyltransferase	Cyanoamino acid metabolism	Metabolism of other amino acids	MCA2467	glutamate--cysteine ligase	Cysteine and methionine metabolism	Amino acid metabolism
MCA2249	glutamate 5-kinase	Arginine and proline metabolism	Amino acid metabolism	MCA2781	acetylglutamate kinase	Arginine biosynthesis	Amino acid metabolism
MCA2445	beta-hydroxyacyl-ACP dehydratase	Biotin metabolism	Metabolism of vitamins	MCA2878	beta-hydroxydecanoyl-ACP dehydratase	Fatty acid biosynthesis	Lipid metabolism
MCA2803	1-(5-phosphoribosyl)-5-((5-	Histidine metabolism	Amino acid metabolism	MCA2867	HisA/HisF family protein	Histidine metabolism	Amino acid metabolism
MCA3040	transketolase	Carbon fixation in photosynthetic organisms	Others	MCA3046	transketolase	Carbon fixation in photosynthetic organisms	Others
