# Supplementary material for: Genome-scale metabolic reconstruction and metabolic versatility of an obligate methanotroph Methylococcus capsulatus str. Bath
Source: PeerJ. 2019 Jun 14;7:e6685. doi: 10.7717/peerj.6685 (PMC6613435; doi:10.7717/peerj.6685)
Supplement: Supplemental Information 7 [file peerj-07-6685-s007.xlsx]

## Sheet: Reaction SubSets
Reation Abbreviation	Reaction Full Name	Sub System
Set # :1	Set # :1	Set # :1
Rspont2	Spontanous Reaction	Spontanous
R10147	L-aspartate-4-semialdehyde hydro-lyase [adding pyruvate and cyclizing; (2S,4S)-4-hydroxy-2,3,4,5-tetrahydrodipicolinate-forming]	Monobactam biosynthesis
R08648	pyruvate:2-oxobutanoate acetaldehydetransferase (decarboxylating)	Valine, leucine and isoleucine biosynthesis
R08210	dimethylallyl diphosphate:ferredoxin oxidoreductase	Terpenoid backbone biosynthesis
R07499		Steroid biosynthesis
R07405	5-carboxyamino-1-(5-phospho-D-ribosyl)imidazole carboxymutase	Purine metabolism
R07404	5-amino-1-(5-phospho-D-ribosyl)imidazole:carbon-dioxide ligase (ADP-forming)	Purine metabolism
R07281	D-ribulose 5-phosphate formate-lyase (L-3,4-dihydroxybutan-2-one 4-phosphate-forming)	Riboflavin metabolism
R07280	5-amino-6-(5-phospho-D-ribitylamino)uracil phosphohydrolase	Riboflavin metabolism
R06447	(2E,6E)-farnesyl-diphosphate:isopentenyl-diphosphate cistransferase (adding 8 isopentenyl units)	Terpenoid backbone biosynthesis
R05884	isopentenyl-diphosphate:ferredoxin oxidoreductase	Terpenoid backbone biosynthesis
R05705	FMNH2:NAD+ oxidoreductase	Riboflavin metabolism
R05688	1-Deoxy-D-xylulose-5-phosphate isomeroreductase	Terpenoid backbone biosynthesis
R05640	Lanosterol,NADPH:oxygen oxidoreductase (14-methyl cleaving)	Steroid biosynthesis
R05639	4,4-dimethyl-5a-cholesta-8,24-dien-3b-ol:NADP+ D14-oxidoreductase	Steroid biosynthesis
R05637	2-Phospho-4-(cytidine 5'-diphospho)-2-C-methyl-D-erythritol CMP-lyase (cyclizing)	Terpenoid backbone biosynthesis
R05636	1-Deoxy-D-xylulose-5-phosphate pyruvate-lyase (carboxylating)	Thiamine metabolism
R05634	ATP:4-(Cytidine 5'-diphospho)-2-C-methyl-D-erythritol 2-phosphotransferase	Terpenoid backbone biosynthesis
R05633	CTP: 2-C-Methyl-D-erythritol 4-phosphate cytidylyltransferase	Terpenoid backbone biosynthesis
R05630	UDP-N-acetylmuramoyl-L-alanyl-gamma-D-glutamyl-meso-2,6-diaminopimeloyl-D-alanyl-D-alanine:undecaprenyl-phosphate phospho-N-acetylmuramoyl-pentapeptide-transferase	Peptidoglycan biosynthesis
R05627	undecaprenyl-diphosphate phosphohydrolase	Peptidoglycan biosynthesis
R05070	(R)-2,3-Dihydroxy-3-methylpentanoate hydro-lyase	Valine, leucine and isoleucine biosynthesis
R05069	(S)-2-Aceto-2-hydroxybutanoate:NADP+ oxidoreductase (isomerizing)	Valine, leucine and isoleucine biosynthesis
R05068	(R)-2,3-Dihydroxy-3-methylpentanoate:NADP+ oxidoreductase (isomerizing)	Valine, leucine and isoleucine biosynthesis
R05032	UDP-N-acetyl-D-glucosamine:undecaprenyl-diphospho-N-acetylmuramoyl-L-alanyl-gamma-D-glutamyl-meso-2,6-diaminopimeloyl-D-alanyl-D-alanine 4-beta-N-acetylglucosaminlytransferase	Peptidoglycan biosynthesis
R04640	N-(5'-phospho-D-ribosylformimino)-5-amino-1- (5''-phospho-D-ribosyl)-4-imidazolecarboxamide ketol-isomerase;	Histidine metabolism
R04617	UDP-N-acetylmuramoyl-L-alanyl-D-glutamyl-meso-2,6-diaminoheptanedioate:D-alanyl-D-alanine ligase(ADP-forming)	Lysine biosynthesis
R04591	1-(5-Phosphoribosyl)-5-amino-4-carboxyimidazole:L-aspartate ligase (ADP-forming)	Purine metabolism
R04560	10-Formyltetrahydrofolate:5'-phosphoribosyl-5-amino-4-imidazolecarboxamide formyltransferase	Purine metabolism
R04559	1-(5'-Phosphoribosyl)-5-amino-4-(N-succinocarboxamide)-imidazole AMP-lyase	Purine metabolism
R04558		Histidine metabolism
R04475	N-Succinyl-L-2,6-diaminoheptanedioate:2-oxoglutarate amino-transferase	Lysine biosynthesis
R04463	5'-Phosphoribosylformylglycinamide:L-glutamine amido-ligase (ADP-forming)	Purine metabolism
R04457	5-amino-6-(D-ribitylamino)uracil butanedionetransferase	Riboflavin metabolism
R04426	(2R,3S)-3-isopropylmalate:NAD+ oxidoreductase	Valine, leucine and isoleucine biosynthesis
R04365	Succinyl-CoA:2,3,4,5-tetrahydropyridine-2,6-dicarboxylate N-succinyltransferase	Lysine biosynthesis
R04292	glycerone phosphate:iminosuccinate alkyltransferase (cyclizing)	Nicotinate and nicotinamide metabolism
R04208	2-(Formamido)-N1-(5-phosphoribosyl)acetamidine cyclo-ligase (ADP-forming)	Purine metabolism
R04144	5-Phospho-D-ribosylamine:glycine ligase (ADP-forming)	Purine metabolism
R04037	1-(5-phospho-D-ribosyl)-AMP 1,6-hydrolase	Histidine metabolism
R04035	Phosphoribosyl-ATP pyrophosphohydrolase	Histidine metabolism
R04001	3-Isopropylmalate hydro-lyase	Valine, leucine and isoleucine biosynthesis
R03968	2-Isopropylmalate hydro-lyase	Valine, leucine and isoleucine biosynthesis
R03509	N-(5-Phospho-beta-D-ribosyl)anthranilate ketol-isomerase	Phenylalanine, tyrosine and tryptophan biosynthesis
R03508	1-(2-Carboxyphenylamino)-1-deoxy-D-ribulose-5-phosphate carboxy-lyase(cyclizing)	Phenylalanine, tyrosine and tryptophan biosynthesis
R03460	Phosphoenolpyruvate:3-phosphoshikimate 5-O-(1-carboxyvinyl)-transferase	Phenylalanine, tyrosine and tryptophan biosynthesis
R03459	2,5-Diamino-6-hydroxy-4-(5-phosphoribosylamino)-pyrimidine 2-aminohydrolase	Riboflavin metabolism
R03458	5-amino-6-(5-phosphoribitylamino)uracil:NADP+ 1'-oxidoreductase	Riboflavin metabolism
R03457	D-erythro-1-(Imidazol-4-yl)glycerol 3-phosphate hydro-lyase	Histidine metabolism
R03348	Nicotinate-nucleotide:pyrophosphate phosphoribosyltransferase (carboxylating)	Nicotinate and nicotinamide metabolism
R03269	N-[(R)-4'-Phosphopantothenoyl]-L-cysteine carboxy-lyase	Pantothenate and CoA biosynthesis
R03243	5-Amino-2-oxopentanoate:2-oxoglutarate aminotransferase	Histidine metabolism
R03199	(S)-2,3-Epoxysqualene mutase (cyclizing, lanosterol-forming)	Steroid biosynthesis
R03193	UDP-N-acetylmuramate:L-alanine ligase (ADP-forming)	D-Glutamine and D-glutamate metabolism
R03084	3-Dehydroquinate hydro-lyase	Phenylalanine, tyrosine and tryptophan biosynthesis
R03083	2-Dehydro-3-deoxy-D-arabino-heptonate 7-phosphate phosphate-lyase (cyclyzing)	Phenylalanine, tyrosine and tryptophan biosynthesis
R03035	ATP:pantetheine-4'-phosphate adenylyltransferase	Pantothenate and CoA biosynthesis
R03018	ATP:pantothenate 4'-phosphotransferase	Pantothenate and CoA biosynthesis
R03013	L-histidinol-phosphate phosphohydrolase	Histidine metabolism
R03012	L-Histidinol:NAD+ oxidoreductase	Histidine metabolism
R02874	squalene,NADPH-hemoprotein:oxygen oxidoreductase (2,3-epoxidizing)	Steroid biosynthesis
R02872	presqualene-diphosphate diphosphate-lyase (reducing, squalene-forming)	Steroid biosynthesis
R02788	UDP-N-acetylmuramoyl-L-alanyl-D-glutamate:(L)-meso-2,6-diaminoheptanedioate gamma-ligase (ADP-forming);	Lysine biosynthesis
R02783	UDP-N-acetylmuramoyl-L-alanine:D-glutamate ligase(ADP-forming)	D-Glutamine and D-glutamate metabolism
R02735	LL-2,6-Diaminoheptanedioate 2-epimerase	Lysine biosynthesis
R02734	N-Succinyl-LL-2,6-diaminoheptanedioate amidohydrolase	Lysine biosynthesis
R02473	(R)-Pantoate:beta-alanine ligase (AMP-forming)	beta-Alanine metabolism
R02472	(R)-Pantoate:NADP+ 2-oxidoreductase	Pantothenate and CoA biosynthesis
R02421		Starch and sucrose metabolism
R02413	Shikimate:NADP+ 3-oxidoreductase	Phenylalanine, tyrosine and tryptophan biosynthesis
R02412	ATP:shikimate 3-phosphotransferase	Phenylalanine, tyrosine and tryptophan biosynthesis
R02291	L-Aspartate-4-semialdehyde:NADP+ oxidoreductase (phosphorylating)	Glycine, serine and threonine metabolism
R02199	L-Isoleucine:2-oxoglutarate aminotransferase	Valine, leucine and isoleucine degradation
R02101	5,10-Methylenetetrahydrofolate:dUMP C-methyltransferase	Pyrimidine metabolism
R02094	ATP:dTMP phosphotransferase	Pyrimidine metabolism
R02093	ATP:dTDP phosphotransferase	Pyrimidine metabolism
R02019	2'-Deoxyguanosine 5'-diphosphate:oxidized-thioredoxin 2'-oxidoreductase	Purine metabolism
R02017	2'-Deoxyadenosine 5'-diphosphate:oxidized-thioredoxin 2'-oxidoreductase	Purine metabolism
R02016	NADPH:oxidized-thioredoxin oxidoreductase	Pyrimidine metabolism
R02003	Geranyl-diphosphate:isopentenyl-diphosphate geranyltrans-transferase	Terpenoid backbone biosynthesis
R01993	(S)-dihydroorotate amidohydrolase	Pyrimidine metabolism
R01954	L-Citrulline:L-aspartate ligase (AMP-forming)	Arginine biosynthesis
R01870	Orotidine-5'-phosphate:diphosphate phospho-alpha-D-ribosyl-transferase	Pyrimidine metabolism
R01826	Phosphoenolpyruvate:D-erythrose-4-phosphate C-(1-carboxyvinyl)transferase (phosphate hydrolysing, 2-carboxy-2-oxoethyl-forming)	Phenylalanine, tyrosine and tryptophan biosynthesis
R01786	ATP:alpha-D-glucose 6-phosphotransferase	Glycolysis / Gluconeogenesis
R01777	Succinyl-CoA:L-homoserine O-succinyltransferase	Cysteine and methionine metabolism
R01771	ATP:L-homoserine O-phosphotransferase	Glycine, serine and threonine metabolism
R01728	Prephenate:NAD+ oxidoreductase(decarboxylating)	Phenylalanine, tyrosine and tryptophan biosynthesis
R01715	Chorismate pyruvatemutase	Phenylalanine, tyrosine and tryptophan biosynthesis
R01714	5-O-(1-Carboxyvinyl)-3-phosphoshikimate phosphate-lyase (chorismate-forming)	Phenylalanine, tyrosine and tryptophan biosynthesis
R01658	Dimethylallyl-diphosphate:isopentenyl-diphosphate dimethylallyltranstransferase	Terpenoid backbone biosynthesis
R01652		Valine, leucine and isoleucine biosynthesis
R01514	ATP:(R)-glycerate 3-phosphotransferase	Glycine, serine and threonine metabolism
R01466	O-phospho-L-homoserine phosphate-lyase (adding water;L-threonine-forming)	Glycine, serine and threonine metabolism
R01398	Carbamoyl-phosphate:L-ornithine carbamoyltransferase	Arginine biosynthesis
R01397	carbamoyl-phosphate:L-aspartate carbamoyltransferase	Pyrimidine metabolism
R01373	prephenate hydro-lyase (decarboxylating; phenylpyruvate-forming)	Phenylalanine, tyrosine and tryptophan biosynthesis
R01288	O4-succinyl-L-homoserine:hydrogen sulfide S-(3-amino-3-carboxypropyl)transferase;	Cysteine and methionine metabolism
R01213	acetyl-CoA:3-methyl-2-oxobutanoate C-acetyltransferase (thioester-hydrolysing, carboxymethyl-forming);	Valine, leucine and isoleucine biosynthesis
R01163	L-histidinal:NAD+ oxidoreductase	Histidine metabolism
R01150	D-alanine:D-alanine ligase (ADP-forming)	D-Alanine metabolism
R01135	IMP:L-aspartate ligase (GDP-forming)	Purine metabolism
R01130	IMP:NAD+ oxidoreductase	Purine metabolism
R01127	IMP 1,2-hydrolase (decyclizing)	Purine metabolism
R01090	L-Leucine:2-oxoglutarate aminotransferase	Valine, leucine and isoleucine degradation
R01086	2-(Nomega-L-arginino)succinate arginine-lyase (fumarate-forming)	Arginine biosynthesis
R01083	N6-(1,2-dicarboxyethyl)AMP AMP-lyase (fumarate-forming)	Purine metabolism
R01082	(S)-malate hydro-lyase (fumarate-forming)	Citrate cycle (TCA cycle)
R01073	N-(5-Phospho-D-ribosyl)anthranilate:pyrophosphate phosphoribosyl-transferase	Phenylalanine, tyrosine and tryptophan biosynthesis
R01072	5-phosphoribosylamine:diphosphate phospho-alpha-D-ribosyltransferase (glutamate-amidating)	Purine metabolism
R01071	1-(5-phospho-D-ribosyl)-ATP:diphosphate phospho-alpha-D-ribosyl-transferase	Histidine metabolism
R01049	ATP:D-ribose-5-phosphate diphosphotransferase	Pentose phosphate pathway
R00996	L-threonine ammonia-lyase (2-oxobutanoate-forming)	Glycine, serine and threonine metabolism
R00965	orotidine-5'-phosphate carboxy-lyase (UMP-forming)	Pyrimidine metabolism
R00734	L-tyrosine:2-oxoglutarate aminotransferase	Ubiquinone and other terpenoid-quinone biosynthesis
R00702	farnesyl-diphosphate:farnesyl-diphosphate farnesyltransferase	Steroid biosynthesis
R00694	L-Phenylalanine:2-oxoglutarate aminotransferase	Phenylalanine metabolism
R00660	Phosphoenolpyruvate:UDP-N-acetyl-D-glucosamine 1-carboxyvinyl-transferase	Amino sugar and nucleotide sugar metabolism
R00489	L-aspartate 1-carboxy-lyase (beta-alanine-forming)	beta-Alanine metabolism
R00480	ATP:L-aspartate 4-phosphotransferase	Glycine, serine and threonine metabolism
R00451	meso-2,6-diaminoheptanedioate carboxy-lyase (L-lysine-forming)	Lysine biosynthesis
R00425	GTP 7,8-8,9-dihydrolase (diphosphate-forming)	Riboflavin metabolism
R00161	ATP:FMN adenylyltransferase	Riboflavin metabolism
R00130	ATP:dephospho-CoA 3'-phosphotransferase	Pantothenate and CoA biosynthesis
R00104	ATP:NAD+ 2'-phosphotransferase	Nicotinate and nicotinamide metabolism
R00066	6,7-Dimethyl-8-(1-D-ribityl)lumazine:6,7-dimethyl-8-(1-D-ribityl)lumazine 2,3-butanediyltransferase	Riboflavin metabolism
R00028	maltose glucohydrolase	Starch and sucrose metabolism
Biomass_reaction	Biomass Reaction	Exchange
EX_Heme	Exchange Reaction	Exchange Reactions
EX_C00305	Exchange Reaction	Exchange Reactions
EX_C00175	Exchange Reaction	Exchange Reactions
EX_C00076	Exchange Reaction	Exchange Reactions
EX_C00070	Exchange Reaction	Exchange Reactions
EX_C00023	Exchange Reaction	Exchange Reactions
Heme_tx_pc	Transport Reaction	Transport Reactions
Heme_tx_ep	Transport Reaction	Transport Reactions
C00305_tx_pc	Transport Reaction	Transport Reactions
C00305_tx_ep	Transport Reaction	Transport Reactions
C00175_tx_pc	Transport Reaction	Transport Reactions
C00175_tx_ep	Transport Reaction	Transport Reactions
C00076_tx_pc	Transport Reaction	Transport Reactions
C00076_tx_ep	Transport Reaction	Transport Reactions
C00070_tx_pc	Transport Reaction	Transport Reactions
C00070_tx_ep	Transport Reaction	Transport Reactions
C00023_tx_pc	Transport Reaction	Transport Reactions
C00023_tx_ep	Transport Reaction	Transport Reactions
Set # :2	Set # :2	Set # :2
R10707	acetyl-CoA:malonyl-[acyl-carrier protein] C-acetyltransferase (decarboxylating)	Fatty acid biosynthesis
R04965	(3R)-3-Hydroxybutanoyl-[acyl-carrier-protein] hydro-lyase	Fatty acid biosynthesis
R04964	(3R)-3-Hydroxydodecanoyl-[acyl-carrier-protein]:NADP+ oxidoreductase	Fatty acid biosynthesis
R04963	Decanoyl-[acyl-carrier protein]:malonyl-[acyl-carrier-protein] C-acyltransferase (decarboxylating)	Fatty acid biosynthesis
R04960	Octanoyl-[acyl-carrier protein]:malonyl-[acyl-carrier-protein] C-acyltransferase (decarboxylating)	Fatty acid biosynthesis
R04957	hexanoyl-[acyl-carrier protein]:malonyl-[acyl-carrier-protein] C-acyltransferase (decarboxylating)	Fatty acid biosynthesis
R04954	(3R)-3-Hydroxybutanoyl-[acyl-carrier-protein] hydro-lyase	Fatty acid biosynthesis
R04953	(3R)-3-Hydroxyhexanoyl-[acyl-carrier-protein]:NADP+ oxidoreductase	Fatty acid biosynthesis
R04952	butyryl-[acyl-carrier protein]:malonyl-[acyl-carrier-protein] C-acyltransferase (decarboxylating)	Fatty acid biosynthesis
R04726	dodecanoyl-[acyl-carrier-protein]:malonyl-[acyl-carrier-protein] C-acyltransferase (decarboxylating)	Fatty acid biosynthesis
R04566	(3R)-3-Hydroxytetradecanoyl-[acyl-carrier-protein]:NADP+ oxidoreductase	Fatty acid biosynthesis
R04537	(3R)-3-Hydroxybutanoyl-[acyl-carrier-protein] hydro-lyase;	Fatty acid biosynthesis
R04536	(3R)-3-Hydroxyoctanoyl-[acyl-carrier-protein]:NADP+ oxidoreductase	Fatty acid biosynthesis
R04535	(3R)-3-Hydroxybutanoyl-[acyl-carrier-protein] hydro-lyase	Fatty acid biosynthesis
R04534	(3R)-3-Hydroxydecanoyl-[acyl-carrier-protein]:NADP+ oxidoreductase	Fatty acid biosynthesis
R04533	(3R)-3-Hydroxybutanoyl-[acyl-carrier protein]:NADP+ oxidoreductase	Fatty acid biosynthesis
R04428	(3R)-3-Hydroxybutanoyl-[acyl-carrier-protein] hydro-lyase	Fatty acid biosynthesis
Set # :3	Set # :3	Set # :3
R05074	CMP-3-deoxy-D-manno-oct-2-ulosonate:(KDO)-lipid IVA 3-deoxy-D-manno-oct-2-ulosonate transferase	Lipopolysaccharide biosynthesis
R04658	CMP-3-deoxy-D-manno-oct-2-ulosonate:lipid IVA 3-deoxy-D-manno-oct-2-ulosonate transferase	Lipopolysaccharide biosynthesis
R04657	ATP:2,3,2',3'-tetrakis(3-hydroxytetradecanoyl)-D-glucosaminyl-beta-D-1,6-glucosaminyl-alpha-phosphate 4-O'-phosphotransferase	Lipopolysaccharide biosynthesis
R04606	UDP-2,3-bis(3-hydroxytetradecanoyl)glucosamine:2,3-bis-(3-hydroxytetradecanoyl)-alpha-D-glucosaminyl-1-phosphate 2,3-bis(3-hydroxytetradecanoyl)-glucosaminyltransferase	Lipopolysaccharide biosynthesis
R04587	UDP-3-O-[(3R)-3-hydroxymyristoyl]-N-acetylglucosamine amidohydrolase	Lipopolysaccharide biosynthesis
R04567	(R)-3-Hydroxytetradecanoly-[acyl-carrier-protein]:UDP-N-acetyl-glucosamine 3-O-(3-hydroxytetradecanoyl)transferase	Lipopolysaccharide biosynthesis
R04550	(3R)-3-hydroxymyristoyl-[acyl-carrier protein]:UDP-3-O-[(3R)-3-hydroxymyristoyl]-alpha-D-glucosamine N-acetyltransferase	Lipopolysaccharide biosynthesis
R04549	UDP-2,3-bis[(3R)-3-hydroxymyristoyl]-alpha-D-glucosamine 2,3-bis[(3R)-3-hydroxymyristoyl]-beta-D-glucosaminyl 1-phosphate phosphohydrolase	Lipopolysaccharide biosynthesis
R03351	CTP:3-deoxy-D-manno-octulosonate cytidylyltransferase	Lipopolysaccharide biosynthesis
R03350	3-Deoxy-D-manno-octulosonate-8-phosphate 8-phosphohydrolase	Lipopolysaccharide biosynthesis
R03254	phosphoenolpyruvate:D-arabinose-5-phosphate C-(1-carboxyvinyl)transferase (phosphate-hydrolysing, 2-carboxy-2-oxoethyl-forming);	Lipopolysaccharide biosynthesis
R01530	D-arabinose-5-phosphate aldose-ketose-isomerase	Lipopolysaccharide biosynthesis
Set # :4	Set # :4	Set # :4
R09518	methane,quinol:oxygen oxidoreductase	Methane metabolism
R01142	Methane,NADH:oxygen oxidoreductase (hydroxylating)	Methane metabolism
CH4_tx_pc	Transport Reaction	Transport Reactions
ubiquinol_tx_pc	Transport Reaction	Exchange Reactions
ubiquinone_tx_pc	Transport Reaction	Exchange Reactions
methanol_tx_cp	Transport Reaction	Exchange Reactions
Set # :5	Set # :5	Set # :5
R00858	hydrogen-sulfide:NADP+ oxidoreductase	Sulfur metabolism
R00528	Sulfite:ferricytochrome-c oxidoreductase	Sulfur metabolism
EX_sulfate	Exchange Reaction	Exchange Reactions
sulfate_tx_pc	Transport Reaction	Transport Reactions
sulfate_tx_ep	Transport Reaction	Transport Reactions
Set # :6	Set # :6	Set # :6
R00704	(R)-Lactate:NAD+ oxidoreductase	Pyruvate metabolism
EX_Lact	Exchange Reaction	Exchange Reactions
Lact_tx_pc	Transport Reaction	Transport Reactions
Lact_tx_ep	Transport Reaction	Transport Reactions
Set # :7	Set # :7	Set # :7
R00899	L-cysteinylglycine dipeptidase	Glutathione metabolism
R00894	L-glutamate:L-cysteine gamma-ligase (ADP-forming)	Glutathione metabolism
R00497	gamma-L-glutamyl-L-cysteine:glycine ligase (ADP-forming)	Glutathione metabolism
R00494	glutathione gamma-glutamylaminopeptidase	Glutathione metabolism
Set # :8	Set # :8	Set # :8
R01518	D-phosphoglycerate 2,3-phosphomutase	Glycolysis / Gluconeogenesis
R01512	ATP:3-phospho-D-glycerate 1-phosphotransferase	Glycolysis / Gluconeogenesis
R01061	D-glyceraldehyde-3-phosphate:NAD+ oxidoreductase (phosphorylating)	Glycolysis / Gluconeogenesis
R00658	2-phospho-D-glycerate hydro-lyase (phosphoenolpyruvate-forming)	Glycolysis / Gluconeogenesis
Set # :9	Set # :9	Set # :9
R01900	isocitrate hydro-lyase (cis-aconitate-forming)	Citrate cycle (TCA cycle)
R01325	citrate hydro-lyase (cis-aconitate-forming)	Citrate cycle (TCA cycle)
R00709	isocitrate:NAD+ oxidoreductase (decarboxylating)	Citrate cycle (TCA cycle)
R00351	acetyl-CoA:oxaloacetate C-acetyltransferase (thioester-hydrolysing)	Citrate cycle (TCA cycle)
Set # :10	Set # :10	Set # :10
R04968	Tetradecanoyl-[acyl-carrier protein]:malonyl-[acyl-carrier-protein] C-acyltransferase (decarboxylating)	Fatty acid biosynthesis
R04544	(3R)-3-hydroxypalmitoyl-[acyl-carrier-protein] hydro-lyase	Fatty acid biosynthesis
R04543	(3R)-3-Hydroxypalmitoyl-[acyl-carrier-protein]:NADP+ oxidoreductase	Fatty acid biosynthesis
R01706	hexadecanoyl-[acyl-carrier protein] hydrolase	Fatty acid biosynthesis
Set # :11	Set # :11	Set # :11
R05071	(S)-2-Acetolactate methylmutase	Valine, leucine and isoleucine biosynthesis
R04441	(R)-2,3-Dihydroxy-3-methylbutanoate hydro-lyase	Valine, leucine and isoleucine biosynthesis
R04440	(R)-2,3-Dihydroxy-3-methylbutanoate:NADP+ oxidoreductase (isomerizing)	Valine, leucine and isoleucine biosynthesis
R00226	pyruvate:pyruvate acetaldehydetransferase (decarboxylating);	Valine, leucine and isoleucine biosynthesis
Set # :12	Set # :12	Set # :12
R05332	Acetyl-CoA:D-glucosamine-1-phosphate N-acetyltransferase	Amino sugar and nucleotide sugar metabolism
R02060	D-Glucosamine 1-phosphate 1,6-phosphomutase;	Amino sugar and nucleotide sugar metabolism
R00768	L-glutamine:D-fructose-6-phosphate isomerase (deaminating);	Alanine, aspartate and glutamate metabolism
R00416	UTP:N-acetyl-alpha-D-glucosamine-1-phosphate uridylyltransferase	Amino sugar and nucleotide sugar metabolism
Set # :13	Set # :13	Set # :13
EX_Suc	Exchange Reaction	Exchange Reactions
Suc_tx_pc	Transport Reaction	Transport Reactions
Suc_tx_ep	Transport Reaction	Transport Reactions
Set # :14	Set # :14	Set # :14
EX_Ac	Exchange Reaction	Exchange Reactions
Ac_tx_pc	Transport Reaction	Transport Reactions
Ac_tx_ep	Transport Reaction	Transport Reactions
Set # :15	Set # :15	Set # :15
EX_CO2	Exchange Reaction	Exchange Reactions
CO2_tx_pc	Transport Reaction	Transport Reactions
CO2_tx_ep	Transport Reaction	Transport Reactions
Set # :16	Set # :16	Set # :16
EX_Formate	Exchange Reaction	Exchange Reactions
Formate_tx_pc	Transport Reaction	Transport Reactions
Formate_tx_ep	Transport Reaction	Transport Reactions
Set # :17	Set # :17	Set # :17
EX_H2O	Exchange Reaction	Exchange Reactions
H2O_tx_pc	Transport Reaction	Transport Reactions
H2O_tx_ep	Transport Reaction	Transport Reactions
Set # :18	Set # :18	Set # :18
EX_nitrite	Exchange Reaction	Exchange Reactions
nitrite_pc	Transport Reaction	Transport Reactions
nitrite_ep	Transport Reaction	Transport Reactions
Set # :19	Set # :19	Set # :19
EX_Pi	Exchange Reaction	Exchange Reactions
Pi_tx_pc	Transport Reaction	Transport Reactions
Pi_tx_ec	Transport Reaction	Transport Reactions
Set # :20	Set # :20	Set # :20
EX_Pyr	Exchange Reaction	Exchange Reactions
Pyr_tx_pc	Transport Reaction	Transport Reactions
Pyr_tx_ep	Transport Reaction	Transport Reactions
Set # :21	Set # :21	Set # :21
R00576		Alanine, aspartate and glutamate metabolism
oxoglutarate_tx	Transport Reaction	Transport Reactions
EX_oxoglutarate	Exchange Reaction	Exchange Reactions
Set # :22	Set # :22	Set # :22
R01148	D-Alanine:2-oxoglutarate aminotransferase	D-Alanine metabolism
R00401	alanine racemase	D-Alanine metabolism
R00260	glutamate racemase	D-Glutamine and D-glutamate metabolism
Set # :23	Set # :23	Set # :23
R02164	succinate:quinone oxidoreductase	Citrate cycle (TCA cycle)
R01868	(S)-dihydroorotate:quinone oxidoreductase	Pyrimidine metabolism
R01867	(S)-dihydroorotate:fumarate oxidoreductase	Pyrimidine metabolism
Set # :24	Set # :24	Set # :24
R03051	2,3-Dihydroxy-3-methylbutanoate:NADP+ oxidoreductase (isomerizing)	Pantothenate and CoA biosynthesis
R01209	2,3-Dihydroxy-3-methylbutanoate hydro-lyase	Pantothenate and CoA biosynthesis
R00006	pyruvate:pyruvate acetaldehydetransferase (decarboxylating);	Pantothenate and CoA biosynthesis
Set # :25	Set # :25	Set # :25
R03409	guanosine 3'-diphosphate 5'-triphosphate 5'-phosphohydrolase	Purine metabolism
R00429	ATP:GTP 3'-diphosphotransferase	Purine metabolism
R00336	guanosine-3',5'-bis(diphosphate) 3'-diphosphohydrolase	Purine metabolism
Set # :26	Set # :26	Set # :26
R03443	N-acetyl-L-glutamate-5-semialdehyde:NADP+ 5-oxidoreductase (phosphrylating)	Arginine biosynthesis
R02649	ATP:N-acetyl-L-glutamate 5-phosphotransferase	Arginine biosynthesis
R02283	N2-Acetyl-L-ornithine:2-oxoglutarate aminotransferase	Arginine biosynthesis
Set # :27	Set # :27	Set # :27
EX_formaldehyde	Transport Reaction	Exchange Reactions
formaldehyde_tx	Transport Reaction	Exchange Reactions
Set # :28	Set # :28	Set # :28
OAA_tx	Transport Reaction	Transport Reactions
EX_OAA	Exchange Reaction	Exchange Reactions
Set # :29	Set # :29	Set # :29
methyloxobutanoicacid_tx	Transport Reaction	Transport Reactions
EX_methyloxobutanoicacid	Exchange Reaction	Exchange Reactions
Set # :30	Set # :30	Set # :30
Valine_tx	Transport Reaction	Transport Reactions
EX_Valine	Exchange Reaction	Exchange Reactions
Set # :31	Set # :31	Set # :31
Glutamine_tx	Transport Reaction	Transport Reactions
EX_Glutamine	Exchange Reaction	Exchange Reactions
Set # :32	Set # :32	Set # :32
Glutamate_tx	Transport Reaction	Transport Reactions
EX_Glutamate	Exchange Reaction	Exchange Reactions
Set # :33	Set # :33	Set # :33
Cysteine_tx	Transport Reaction	Transport Reactions
EX_Cysteine	Exchange Reaction	Exchange Reactions
Set # :34	Set # :34	Set # :34
Aspartate_tx	Transport Reaction	Transport Reactions
EX_Aspartate	Exchange Reaction	Exchange Reactions
Set # :35	Set # :35	Set # :35
Aspargine_tx	Transport Reaction	Transport Reactions
EX_Aspargine	Exchange Reaction	Exchange Reactions
Set # :36	Set # :36	Set # :36
alanine_tx	Transport Reaction	Transport Reactions
EX_alanine	Exchange Reaction	Exchange Reactions
Set # :37	Set # :37	Set # :37
lps_tx	Transport Reaction	Transport Reactions
EX_lps	Exchange Reaction	Exchange Reactions
Set # :38	Set # :38	Set # :38
CPG161161_tx	Transport Reaction	Transport Reactions
EX_CPG161161	Exchange Reaction	Exchange Reactions
Set # :39	Set # :39	Set # :39
CPG161140_tx	Transport Reaction	Transport Reactions
EX_CPG161140	Exchange Reaction	Exchange Reactions
Set # :40	Set # :40	Set # :40
CPG160161_tx	Transport Reaction	Transport Reactions
EX_CPG160161	Exchange Reaction	Exchange Reactions
Set # :41	Set # :41	Set # :41
CPE161161_tx	Transport Reaction	Transport Reactions
EX_CPE161161	Exchange Reaction	Exchange Reactions
Set # :42	Set # :42	Set # :42
CPE161140_tx	Transport Reaction	Transport Reactions
EX_CPE161140	Exchange Reaction	Exchange Reactions
Set # :43	Set # :43	Set # :43
CPE160161_tx	Transport Reaction	Transport Reactions
EX_CPE160161	Exchange Reaction	Exchange Reactions
Set # :44	Set # :44	Set # :44
CPC161161_tx	Transport Reaction	Transport Reactions
EX_CPC161161	Exchange Reaction	Exchange Reactions
Set # :45	Set # :45	Set # :45
CPC161140_tx	Transport Reaction	Transport Reactions
EX_CPC161140	Exchange Reaction	Exchange Reactions
Set # :46	Set # :46	Set # :46
CPC160161_tx	Transport Reaction	Transport Reactions
EX_CPC160161	Exchange Reaction	Exchange Reactions
Set # :47	Set # :47	Set # :47
CCL161161_tx	Transport Reaction	Transport Reactions
EX_CCL161161	Exchange Reaction	Exchange Reactions
Set # :48	Set # :48	Set # :48
CCL161140_tx	Transport Reaction	Transport Reactions
EX_CCL161140	Exchange Reaction	Exchange Reactions
Set # :49	Set # :49	Set # :49
CCL160161_tx	Transport Reaction	Transport Reactions
EX_CCL160161	Exchange Reaction	Exchange Reactions
Set # :50	Set # :50	Set # :50
EX_O2	Exchange Reaction	Exchange Reactions
O2_tx_ep	Transport Reaction	Transport Reactions
Set # :51	Set # :51	Set # :51
R00192	S-Adenosyl-L-homocysteine hydrolase	Cysteine and methionine metabolism
R00177	ATP:L-methionine S-adenosyltransferase	Cysteine and methionine metabolism
Set # :52	Set # :52	Set # :52
R00316	ATP:acetate adenylyltransferase	Pyruvate metabolism
R00236	acetyl adenylate:CoA acetyltransferase	Pyruvate metabolism
Set # :53	Set # :53	Set # :53
R00509	ATP:adenylylsulfate 3'-phosphotransferase	Purine metabolism
R00508	3'-phospho-5'-adenylyl sulfate 3'-phosphohydrolase	Sulfur metabolism
Set # :54	Set # :54	Set # :54
R00549	ATP:riboflavin 5'-phosphotransferase	Riboflavin metabolism
R00548	riboflavin-5-phosphate phosphohydrolase (acid optimum)	Riboflavin metabolism
Set # :55	Set # :55	Set # :55
R00588	L-Serine:glyoxylate aminotransferase	Glycine, serine and threonine metabolism
R00585	L-Serine:pyruvate aminotransferase	Glycine, serine and threonine metabolism
Set # :56	Set # :56	Set # :56
R00669	N2-Acetyl-L-ornithine amidohydrolase	Arginine biosynthesis
R00259	acetyl-CoA:L-glutamate N-acetyltransferase	Arginine biosynthesis
Set # :57	Set # :57	Set # :57
R00801	sucrose glucohydrolase	Galactose metabolism
R00299	ATP:D-glucose 6-phosphotransferase	Starch and sucrose metabolism
Set # :58	Set # :58	Set # :58
R00844	sn-Glycerol-3-phosphate:NADP+ 2-oxidoreductase	Glycerophospholipid metabolism
R00842	sn-Glycerol-3-phosphate:NAD+ 2-oxidoreductase	Glycerophospholipid metabolism
Set # :59	Set # :59	Set # :59
R00897	O3-acetyl-L-serine:hydrogen-sulfide 2-amino-2-carboxyethyltransferase;	Cysteine and methionine metabolism
R00586	acetyl-CoA:L-serine O-acetyltransferase	Cysteine and methionine metabolism
Set # :60	Set # :60	Set # :60
R01068	D-fructose-1,6-bisphosphate D-glyceraldehyde-3-phosphate-lyase (glycerone-phosphate-forming)	Methane metabolism
R00756	ATP:D-fructose-6-phosphate 1-phosphotransferase	Methane metabolism
Set # :61	Set # :61	Set # :61
R01138	dATP:pyruvate 2-O-phosphotransferase	Purine metabolism
R01137	ATP:dADP phosphotransferase	Purine metabolism
Set # :62	Set # :62	Set # :62
R01214	L-Valine:2-oxoglutarate aminotransferase	Valine, leucine and isoleucine degradation
R01215		Valine, leucine and isoleucine biosynthesis
Set # :63	Set # :63	Set # :63
R01226	5,10-Methylenetetrahydrofolate:3-methyl-2-oxobutanoate hydroxymethyltransferase	Pantothenate and CoA biosynthesis
R01216	2-dehydropantoate formaldehyde-lyase (3-methyl-2-oxobutanoate-forming)	Pantothenate and CoA biosynthesis
Set # :64	Set # :64	Set # :64
R01251	L-Proline:NADP+ 5-oxidoreductase	Arginine and proline metabolism
R01248	L-Proline:NAD+ 5-oxidoreductase	Arginine and proline metabolism
Set # :65	Set # :65	Set # :65
R01256	(S)-malate:CoA ligase (ADP-forming)	Glyoxylate and dicarboxylate metabolism
R00473	L-malyl-CoA glyoxylate-lyase (acetyl-CoA-forming)	Glyoxylate and dicarboxylate metabolism
Set # :66	Set # :66	Set # :66
R01626	Malonyl-CoA:[acyl-carrier-protein] S-malonyltransferase	Fatty acid biosynthesis
R00742	acetyl-CoA:carbon-dioxide ligase (ADP-forming)	Fatty acid biosynthesis
Set # :67	Set # :67	Set # :67
R01775	L-homoserine:NADP+ oxidoreductase	Glycine, serine and threonine metabolism
R01773	L-Homoserine:NAD+ oxidoreductase	Glycine, serine and threonine metabolism
Set # :68	Set # :68	Set # :68
R02301	5-Formyltetrahydrofolate cyclo-ligase (ADP-forming)	One carbon pool by folate
R02300	S-Aminomethyldihydrolipoylprotein:(6S)-tetrahydrofolate aminomethyltransferase (ammonia-forming)	One carbon pool by folate
Set # :69	Set # :69	Set # :69
R02322	nicotinamide-D-ribonucleotide amidohydrolase	Nicotinate and nicotinamide metabolism
R00137	ATP:nicotinamide-nucleotide adenylyltransferase	Nicotinate and nicotinamide metabolism
Set # :70	Set # :70	Set # :70
R02326	ATP:dCDP phosphotransferase	Pyrimidine metabolism
R02024	2'-Deoxycytidine diphosphate:oxidized-thioredoxin 2'-oxidoreductase	Pyrimidine metabolism
Set # :71	Set # :71	Set # :71
R02340	(1S,2R)-1-C-(indol-3-yl)glycerol 3-phosphate D-glyceraldehyde-3-phosphate-lyase	Phenylalanine, tyrosine and tryptophan biosynthesis
R00674	L-serine hydro-lyase (adding indole; L-tryptophan-forming)	Phenylalanine, tyrosine and tryptophan biosynthesis
Set # :72	Set # :72	Set # :72
R03005	ATP:nicotinamide-nucleotide adenylyltransferase	Nicotinate and nicotinamide metabolism
R00257	Deamido-NAD+:L-glutamine amido-ligase (AMP-forming)	Nicotinate and nicotinamide metabolism
Set # :73	Set # :73	Set # :73
R03239	ITP:D-tagatose 6-phosphate 1-phosphotransferase	Galactose metabolism
R00722	ATP:IDP phosphotransferase	Purine metabolism
Set # :74	Set # :74	Set # :74
R03313	L-glutamate-5-semialdehyde:NADP+ 5-oxidoreductase (phosphorylating)	Arginine and proline metabolism
R00239	ATP:L-glutamate 5-phosphotransferase	Arginine and proline metabolism
Set # :75	Set # :75	Set # :75
R04326		One carbon pool by folate
R01655	5,10-Methenyltetrahydrofolate 5-hydrolase (decyclizing)	One carbon pool by folate
Set # :76	Set # :76	Set # :76
R04430	butyryl-[acp]:NADP+ trans-2-oxidoreductase	Fatty acid biosynthesis
R04429	butyryl-[acp]:NAD+ trans-2-oxidoreductase	Fatty acid biosynthesis
Set # :77	Set # :77	Set # :77
R04725	dodecanoyl-[acp]:NADP+ trans-2-oxidoreductase	Fatty acid biosynthesis
R04724	dodecanoyl-[acp]:NAD+ trans-2-oxidoreductase	Fatty acid biosynthesis
Set # :78	Set # :78	Set # :78
R04779	ATP:D-fructose-6-phosphate 1-phosphotransferase	Glycolysis / Gluconeogenesis
R01070	beta-D-fructose-1,6-bisphosphate D-glyceraldehyde-3-phosphate-lyase (glycerone-phosphate-forming)	Glycolysis / Gluconeogenesis
Set # :79	Set # :79	Set # :79
R04956	hexanoyl-[acp]:NADP+ trans-2-oxidoreductase	Fatty acid biosynthesis
R04955	hexanoyl-[acp]:NAD+ trans-2-oxidoreductase	Fatty acid biosynthesis
Set # :80	Set # :80	Set # :80
R04959	octanoyl-[acp]:NADP+ trans-2-oxidoreductase	Fatty acid biosynthesis
R04958	octanoyl-[acp]:NAD+ trans-2-oxidoreductase	Fatty acid biosynthesis
Set # :81	Set # :81	Set # :81
R04962	decanoyl-[acp]:NADP+ trans-2-oxidoreductase	Fatty acid biosynthesis
R04961	decanoyl-[acp]:NAD+ trans-2-oxidoreductase	Fatty acid biosynthesis
Set # :82	Set # :82	Set # :82
R04967	tetradecanoyl-[acp]:NADP+ trans-2-oxidoreductase	Fatty acid biosynthesis
R04966	tetradecanoyl-[acp]:NAD+ trans-2-oxidoreductase	Fatty acid biosynthesis
Set # :83	Set # :83	Set # :83
R04970	hexadecanoyl-[acp]:NADP+ trans-2-oxidoreductase	Fatty acid biosynthesis
R04969	hexadecanoyl-[acp]:NAD+ trans-2-oxidoreductase	Fatty acid biosynthesis
Set # :84	Set # :84	Set # :84
R05605	2-dehydro-3-deoxy-6-phospho-D-gluconate D-glyceraldehyde-3-phosphate-lyase (pyruvate-forming)	Pentose phosphate pathway
R02036	6-Phospho-D-gluconate hydro-lyase(2-dehydro-3-deoxy-6-phospho-D-gluconate-forming)	Pentose phosphate pathway
Set # :85	Set # :85	Set # :85
R08059		Methane metabolism
R03464	5,10-Methenyltetrahydromethanopterin 10-hydrolase (decyclizing)	Methane metabolism
Set # :86	Set # :86	Set # :86
R10164	hydroxylamine:ferricytochrome-c oxidoreductase	Nitrogen metabolism
R00148	ammonia,ubiquinol:oxygen oxidoreductase;	Nitrogen metabolism
Set # :87	Set # :87	Set # :87
R10866	pyruvate:flavodoxin 2-oxidoreductase (CoA-acetylating)	Pyruvate metabolism
R10859	(E)-4-hydroxy-3-methylbut-2-en-1-yl-diphosphate:oxidized flavodoxin oxidoreductase	Terpenoid backbone biosynthesis
Set # :88	Set # :88	Set # :88
Starch_synthesis	Starch Synthesis Reaction	Starch and sucrose metabolism
Starch_degredation	Starch Degredation Reaction	Starch and sucrose metabolism

## Sheet: Summary
No. of Sets	No. of Reactions	Major Pathways
Co-set 1	146	Biomass Precursor
Co-set 2	17	Fatty Acid Synthesis
Co-set 3	12	LPS Biosynthesis
Co-set 4	6	Methane Metabolism
Co-set 5	5	Sulfur Metabolism
Co-set 6 - 12	4	Multiple Pathways
Co-set 13-26	3	Multiple Pathways
Co-set 27-88	2	Multiple Pathways
